# Supplementary material for: Exploiting Natural Variation in Crown Root Traits via Genome-Wide Association Studies in Maize
Source: Research Square preprint supplement (doi:10.21203/rs.3.rs-136918/v1), 2021-01-05
Supplement: Supplementary file 1 [file 0fa016bb4536e546dbb9f255.xlsx]

## Sheet: Title page
	Exploiting natural variation in crown root traits via genome-wide association studies in maize
	Houmiao Wang1#, Xiao Tang1#, Xiaoyi Yang2, Yingying Fan3, Yang Xu3, Pengcheng Li2, Chenwu Xu1* and Zefeng Yang1*
	1Jiangsu Key Laboratory of Crop Genetics and Physiology/ Key Laboratory of Plant Functional Genomics of the Ministry of Education/ Jiangsu Key Laboratory of Crop Genomics and Molecular Breeding, Yangzhou 225009, China
	2Jiangsu Co-Innovation Center for Modern Production Technology of Grain Crops, Yangzhou University, Yangzhou 225009, China
	3Joint International Research Laboratory of Agriculture and Agri-Product Safety of Ministry of Education of China, Yangzhou University
	*Corresponding authors: cwxu@yzu.edu.cn; zfyang@yzu.edu.cn
	Tel: 86-0514-87979358; Fax: 86-0514-879968
	#These authors have contributed equally to this work

## Sheet: Table S1
Table S1. Significant SNPs associated with crown root traits detected by GWAS
Env	Trait	Method	SNP	Chr	Pos	Effect	LOD	-LOG10(P)
2015SY	CRN	FASTmrMLM	SNP_1_5680658	1	5680658	-0.4099	5.4196
2016SY	CRA	FASTmrMLM	SNP_1_14347684	1	14347684	-0.543	5.2377
2016SY	CRA	FASTmrMLM	SNP_1_20278532	1	20278532	0.5001	5.3926
2016SY	CRN	FASTmrMLM	SNP_1_20346877	1	20346877	-0.5868	9.8487
2016SY	CRD	FASTmrMLM	SNP_1_37853195	1	37853195	0.0542	7.3297
2015SY	CRA	FASTmrMLM	SNP_1_38546338	1	38546338	0.8615	3.3381
2016SY	CRA	FASTmrEMMA	SNP_1_41601319	1	41601319	-1.866	7.804
2016SY	CRA	FASTmrMLM	SNP_1_45113031	1	45113031	-0.4963	4.7135
2017SY	CRN	FASTmrMLM	SNP_1_49374399	1	49374399	0.5338	12.3782
Mean	CRA	FASTmrMLM	SNP_1_49386674	1	49386674	0.791	4.1408
2016SY	CRD	FASTmrMLM	SNP_1_52631817	1	52631817	0.0896	4.4332
2016SY	CRA	FASTmrEMMA	SNP_1_56897538	1	56897538	1.7032	4.0586
2016SY	CRA	FASTmrMLM	SNP_1_56897538	1	56897538	0.8555	6.959
Mean	CRN	FASTmrMLM	SNP_1_58987751	1	58987751	-0.1929	3.7538
2017SY	CRN	FASTmrMLM	SNP_1_59031038	1	59031038	-0.2952	3.2485
Mean_CRA	CRA	FarmCPU	1:59370381	1	59370381	-2.13178		9.81016
2016SY	CRA	FarmCPU	1:59370539	1	59370539	-1.43054		6.94753
2017SY	CRN	FASTmrMLM	SNP_1_73741723	1	73741723	-0.3186	4.2733
Mean	CRA	FASTmrMLM	SNP_1_77436707	1	77436707	-0.5615	3.0564
Mean	CRA	FASTmrMLM	SNP_1_91497038	1	91497038	0.5719	4.3143
2016SY	CRN	FASTmrMLM	SNP_1_96003261	1	96003261	-0.2191	3.8534
2017SY	CRD	FASTmrMLM	SNP_1_98352220	1	98352220	0.1311	6.2255
2017SY	CRD	FASTmrMLM	SNP_1_103711817	1	103711817	-0.258	8.016
Mean	CRD	FASTmrMLM	SNP_1_103711817	1	103711817	-0.1133	4.5401
2017SY	CRD	FASTmrMLM	SNP_1_118621868	1	118621868	0.2689	9.5894
2016SY	CRN	FarmCPU	1:118969980	1	118969980	-0.339065		7.55703
2015SY	CRN	FASTmrMLM	SNP_1_147811089	1	147811089	0.5482	3.3749
2016SY	CRD	FASTmrEMMA	SNP_1_160052502	1	160052502	-0.1973	4.1471
2015SY	CRD	FASTmrEMMA	SNP_1_160107745	1	160107745	0.2058	3.3145
2015SY	CRD	FASTmrEMMA	SNP_1_177406418	1	177406418	0.2707	3.1379
2015SY	CRD	FASTmrMLM	SNP_1_177406418	1	177406418	0.1144	4.9231
Mean	CRA	FASTmrMLM	SNP_1_187222914	1	187222914	1.0552	5.4906
2016SY	CRD	FASTmrMLM	SNP_1_188688209	1	188688209	-0.0823	4.8494
2017SY	CRA	FASTmrMLM	SNP_1_202961895	1	202961895	-1.3912	7.5759
Mean	CRA	FarmCPU	1:226062685	1	226062685	-1.02631		5.78018
Mean	CRD	FASTmrEMMA	SNP_1_227741904	1	227741904	-0.1763	4.5242
Mean	CRD	FASTmrMLM	SNP_1_227741904	1	227741904	-0.0651	3.5521
Mean	CRN	FASTmrEMMA	SNP_1_229139297	1	229139297	0.6096	3.4985
2016SY	CRN	FarmCPU	1:230076132	1	230076132	-0.60091		6.91815
2016SY	CRN	FarmCPU	1:242768751	1	242768751	-0.376308		6.84516
Mean	CRA	FarmCPU	1:243464929	1	243464929	-1.48604		5.79165
Mean	CRN	FASTmrMLM	SNP_1_247104265	1	247104265	-0.369	7.2063
2016SY	CRN	FarmCPU	1:258057217	1	258057217	-0.583968		7.57151
2016SY	CRA	FASTmrMLM	SNP_1_271300233	1	271300233	0.3266	3.6847
Mean	CRA	FarmCPU	1:272075375	1	272075375	0.89011		8.88422
2017SY	CRN	FASTmrMLM	SNP_1_277217001	1	277217001	-0.3124	4.3346
Mean	CRD	FASTmrMLM	SNP_1_277704588	1	277704588	0.025	3.1532
2015SY	CRN	FASTmrMLM	SNP_1_277704589	1	277704589	0.557	10.4027
2015SY	CRA	FASTmrEMMA	SNP_1_285593212	1	285593212	2.0669	3.3869
2015SY	CRA	FASTmrMLM	SNP_1_285593212	1	285593212	1.2446	4.582
2016SY	CRN	FASTmrMLM	SNP_1_286038041	1	286038041	0.4292	6.5759
2016SY	CRA	FASTmrEMMA	SNP_1_292661954	1	292661954	1.1248	4.09
2016SY	CRA	FASTmrMLM	SNP_1_292661954	1	292661954	0.5053	4.403
Mean	CRN	FASTmrMLM	SNP_1_294416768	1	294416768	-0.2737	5.369
2016SY	CRD	FarmCPU	2:10352145	2	10352145	-0.115904		6.35733
2015SY	CRN	FASTmrMLM	SNP_2_34477361	2	34477361	-0.5714	6.9691
Mean	CRD	FASTmrMLM	SNP_2_46440488	2	46440488	0.0437	3.2003
Mean	CRD	FarmCPU	2:56868748	2	56868748	-0.10828		6.59775
Mean	CRA	FASTmrMLM	SNP_2_119671038	2	119671038	1.0624	8.5958
2016SY	CRN	FASTmrMLM	SNP_2_122137426	2	122137426	-0.3303	4.225
2015SY	CRD	FASTmrMLM	SNP_2_125005517	2	125005517	-0.2055	11.4168
2015SY	CRD	FASTmrMLM	SNP_2_135015891	2	135015891	-0.1323	4.4318
Mean	CRN	FASTmrMLM	SNP_2_148153270	2	148153270	0.3811	6.3749
Mean	CRD	FASTmrEMMA	SNP_2_154860744	2	154860744	-0.1843	4.4586
2016SY	CRA	FASTmrMLM	SNP_2_156810787	2	156810787	0.7343	7.5604
Mean	CRA	FASTmrMLM	SNP_2_157581455	2	157581455	1.0449	6.2801
Mean	CRN	FASTmrMLM	SNP_2_157965931	2	157965931	0.2778	3.6789
Mean	CRN	FASTmrEMMA	SNP_2_163742965	2	163742965	0.6121	6.1096
2017SY	CRN	FASTmrMLM	SNP_2_171454323	2	171454323	-0.6971	5.5428
2016SY	CRD	FASTmrMLM	SNP_2_181822107	2	181822107	-0.0754	7.0815
Mean	CRD	FASTmrEMMA	SNP_2_185802997	2	185802997	-0.0004	4.5857
2017SY	CRD	FASTmrMLM	SNP_2_185802997	2	185802997	-0.3058	6.6629
Mean	CRD	FASTmrMLM	SNP_2_185802997	2	185802997	-0.1484	8.5678
2016SY	CRD	FASTmrMLM	SNP_2_186022075	2	186022075	-0.1073	6.6528
Mean	CRD	FarmCPU	2:186828039	2	186828039	-0.116736		6.20109
2016SY	CRN	FASTmrMLM	SNP_2_200348114	2	200348114	-0.4115	8.4622
2016SY	CRN	FASTmrEMMA	SNP_2_204902383	2	204902383	-0.6477	4.3276
Mean	CRD	FASTmrMLM	SNP_2_209923111	2	209923111	0.1183	7.537
2016SY	CRN	FASTmrMLM	SNP_2_209923111	2	209923111	-0.2902	3.172
2016SY	CRA	FASTmrMLM	SNP_2_220536089	2	220536089	0.8116	5.9188
Mean	CRD	FarmCPU	2:223258556	2	223258556	0.0716466		6.14101
2017SY	CRD	FASTmrMLM	SNP_2_236874542	2	236874542	0.1165	4.2918
Mean	CRA	FASTmrMLM	SNP_3_30040926	3	30040926	0.6936	3.0299
Mean	CRD	FarmCPU	3:40155528	3	40155528	0.116721		6.33913
Mean	CRD	FASTmrMLM	SNP_3_62419619	3	62419619	-0.1404	5.6159
Mean	CRN	FASTmrMLM	SNP_3_89591382	3	89591382	0.2553	3.4454
2015SY	CRN	FASTmrMLM	SNP_3_89591402	3	89591402	0.9673	8.8323
2016SY	CRD	FASTmrMLM	SNP_3_92808310	3	92808310	0.0854	12.9324
2016SY	CRA	FASTmrMLM	SNP_3_105362640	3	105362640	-0.4564	3.4307
2016SY	CRD	FASTmrMLM	SNP_3_120490606	3	120490606	0.062	3.2943
Mean	CRD	FASTmrMLM	SNP_3_125641491	3	125641491	0.0846	5.0122
2016SY	CRN	FASTmrMLM	SNP_3_131956549	3	131956549	0.3548	3.9788
Mean	CRN	FASTmrEMMA	SNP_3_148582193	3	148582193	-0.4327	3.4541
Mean	CRN	FASTmrMLM	SNP_3_152205494	3	152205494	-0.3162	4.726
2016SY	CRA	FASTmrMLM	SNP_3_161742632	3	161742632	0.4355	4.221
Mean	CRN	FASTmrMLM	SNP_3_165212180	3	165212180	-0.2967	4.5373
Mean	CRD	FASTmrMLM	SNP_3_181815959	3	181815959	0.0768	3.8314
2017SY	CRD	FASTmrMLM	SNP_3_182982559	3	182982559	0.1587	4.0299
2015SY	CRN	FASTmrEMMA	SNP_3_189044366	3	189044366	-0.8467	3.4596
Mean	CRD	FarmCPU	3:191323638	3	191323638	-0.164796		11.1963
2016SY	CRD	FarmCPU	3:191323638	3	191323638	-0.122582		5.77382
2016SY	CRA	FASTmrMLM	SNP_3_198695763	3	198695763	0.6047	4.9134
Mean	CRD	FASTmrEMMA	SNP_3_200817163	3	200817163	0.2112	9.3393
Mean	CRD	FASTmrMLM	SNP_3_200817163	3	200817163	0.0968	8.7579
Mean	CRD	FarmCPU	3:201371688	3	201371688	-0.0915322		8.35005
2015SY	CRD	FASTmrMLM	SNP_3_214173149	3	214173149	0.1404	3.6324
Mean	CRD	FASTmrMLM	SNP_3_223745521	3	223745521	-0.0509	4.9386
2016SY	CRN	FASTmrMLM	SNP_4_9886170	4	9886170	0.3613	4.4852
2015SY	CRN	FASTmrEMMA	SNP_4_10804837	4	10804837	1.0419	3.9365
2015SY	CRD	FASTmrEMMA	SNP_4_14699281	4	14699281	-0.3789	4.3163
2016SY	CRA	FarmCPU	4:16441465	4	16441465	-0.810208		6.63283
2017SY	CRN	FASTmrMLM	SNP_4_19005533	4	19005533	-0.3942	5.7946
2015SY	CRA	FASTmrMLM	SNP_4_26059605	4	26059605	-1.7496	3.4864
2016SY	CRD	FASTmrMLM	SNP_4_26870903	4	26870903	-0.0989	5.5237
2016SY	CRD	FarmCPU	4:30350453	4	30350453	0.0688736		6.01148
2016SY	CRN	FASTmrMLM	SNP_4_33030710	4	33030710	-0.4555	7.592
Mean	CRA	FASTmrEMMA	SNP_4_33468689	4	33468689	1.4227	4.0842
Mean	CRN	FASTmrMLM	SNP_4_46969796	4	46969796	-0.5323	9.704
Mean	CRN	FASTmrEMMA	SNP_4_52225680	4	52225680	-0.6779	4.9743
Mean	CRN	FASTmrMLM	SNP_4_52225680	4	52225680	-0.2749	5.9578
Mean	CRD	FASTmrMLM	SNP_4_74844221	4	74844221	-0.0174	3.2117
Mean	CRA	FASTmrMLM	SNP_4_86323429	4	86323429	-0.5959	3.2244
2016SY	CRN	FASTmrEMMA	SNP_4_87583019	4	87583019	-1.2176	4.5173
2016SY	CRN	FASTmrMLM	SNP_4_87583019	4	87583019	-0.5874	5.6079
2016SY	CRD	FarmCPU	4:144756490	4	144756490	0.146541		5.92783
Mean	CRA	FASTmrMLM	SNP_4_158101759	4	158101759	0.88	4.9468
2015SY	CRN	FASTmrEMMA	SNP_4_166906113	4	166906113	-1.1862	3.6757
2016SY	CRN	FASTmrMLM	SNP_4_175786824	4	175786824	-0.4238	3.0382
2015SY	CRD	FASTmrMLM	SNP_4_178053727	4	178053727	0.1534	6.1013
Mean	CRA	FASTmrMLM	SNP_4_197894103	4	197894103	0.5963	3.2375
2015SY	CRA	FASTmrMLM	SNP_4_207276394	4	207276394	-1.0261	4.0187
2016SY	CRN	FASTmrEMMA	SNP_4_207569283	4	207569283	-0.9384	6.1376
2016SY	CRN	FASTmrMLM	SNP_4_207569283	4	207569283	-0.3595	5.4721
2017SY	CRA	FASTmrMLM	SNP_4_213761088	4	213761088	1.6169	3.5983
Mean	CRA	FarmCPU	4:214931370	4	214931370	-0.82698		7.45891
2017SY	CRN	FASTmrMLM	SNP_4_226190966	4	226190966	0.4533	3.406
2016SY	CRA	FASTmrMLM	SNP_4_226394641	4	226394641	0.7119	7.7401
2017SY	CRA	FASTmrMLM	SNP_4_229202306	4	229202306	-1.4234	5.1924
2017SY	CRN	FASTmrEMMA	SNP_4_233658705	4	233658705	-0.9918	4.0461
2016SY	CRN	FarmCPU	4:235330942	4	235330942	0.478921		9.1123
2016SY	CRN	FASTmrEMMA	SNP_4_235330942	4	235330942	-1.015	6.0451
Mean	CRN	FASTmrEMMA	SNP_4_235330942	4	235330942	-0.5949	3.6713
2016SY	CRN	FASTmrMLM	SNP_4_235330942	4	235330942	-0.3165	3.897
2016SY	CRD	FarmCPU	4:237985655	4	237985655	0.116579		5.69066
Mean	CRD	FASTmrMLM	SNP_4_237985655	4	237985655	0.0888	4.5092
Mean	CRD	FarmCPU	4:238143069	4	238143069	-0.116791		7.26404
2016SY	CRD	FarmCPU	4:238323089	4	238323089	0.126185		5.5979
Mean	CRA	FASTmrMLM	SNP_5_2105009	5	2105009	0.6826	7.2456
Mean	CRA	FASTmrMLM	SNP_5_3515241	5	3515241	0.8184	3.7547
2016SY	CRA	FarmCPU	5:6923945	5	6923945	-0.671895		5.93833
2016SY	CRD	FASTmrEMMA	SNP_5_7692310	5	7692310	-0.2073	3.4263
2017SY	CRA	FASTmrEMMA	SNP_5_19963657	5	19963657	-3.1601	3.5508
Mean	CRD	FASTmrMLM	SNP_5_21000370	5	21000370	-0.0842	7.5631
Mean	CRD	FASTmrEMMA	SNP_5_23384758	5	23384758	0.1507	3.9594
2016SY	CRD	FASTmrEMMA	SNP_5_23384783	5	23384783	1.7344e-05	4.3604
2017SY	CRA	FASTmrEMMA	SNP_5_30382427	5	30382427	3.6408	3.9248
2016SY	CRN	FASTmrMLM	SNP_5_32022323	5	32022323	0.2113	3.5333
Mean	CRA	FASTmrEMMA	SNP_5_40496106	5	40496106	1.1224	3.073
2017SY	CRN	FASTmrEMMA	SNP_5_41624300	5	41624300	-1.0266	6.2803
Mean	CRD	FarmCPU	5:44040960	5	44040960	-0.155663		8.99424
Mean	CRD	FASTmrMLM	SNP_5_57257561	5	57257561	-0.0767	5.4347
Mean	CRD	FASTmrMLM	SNP_5_57261032	5	57261032	-0.1014	4.366
2017SY	CRA	FASTmrMLM	SNP_5_59630336	5	59630336	0.8885	3.2829
Mean	CRN	FASTmrMLM	SNP_5_60687020	5	60687020	0.2132	4.5465
2017SY	CRD	FASTmrEMMA	SNP_5_63833060	5	63833060	0.3041	3.3203
2016SY	CRD	FASTmrMLM	SNP_5_69649528	5	69649528	0.0797	3.5796
2017SY	CRA	FASTmrMLM	SNP_5_74698918	5	74698918	-1.1886	4.1098
Mean	CRN	FASTmrMLM	SNP_5_84414638	5	84414638	-0.4325	4.2061
Mean	CRA	FASTmrMLM	SNP_5_94812632	5	94812632	0.7224	4.1838
2017SY	CRD	FASTmrMLM	SNP_5_101831587	5	101831587	-0.1403	6.0237
Mean	CRD	FASTmrMLM	SNP_5_111294651	5	111294651	-0.0799	10.173
Mean	CRD	FarmCPU	5:112972297	5	112972297	0.104982		7.66277
Mean	CRN	FASTmrMLM	SNP_5_130569990	5	130569990	-0.1557	4.1598
2015SY	CRD	FASTmrMLM	SNP_5_148974226	5	148974226	-0.1138	4.1748
Mean	CRD	FarmCPU	5:158203765	5	158203765	0.104191		6.94703
2016SY	CRD	FASTmrEMMA	SNP_5_158203765	5	158203765	0.2445	4.6295
Mean	CRD	FASTmrEMMA	SNP_5_158203765	5	158203765	0.3429	7.457
2016SY	CRD	FASTmrMLM	SNP_5_158203765	5	158203765	0.003	4.5594
Mean	CRD	FASTmrMLM	SNP_5_158203765	5	158203765	0.2194	22.9526
2015SY	CRN	FASTmrEMMA	SNP_5_158774511	5	158774511	-1.3514	4.3399
Mean	CRD	FASTmrEMMA	SNP_5_163029725	5	163029725	0.2669	4.3543
2015SY	CRD	FASTmrEMMA	SNP_5_166452989	5	166452989	0.0004	3.4683
2016SY	CRA	FASTmrMLM	SNP_5_176999832	5	176999832	0.7157	9.8279
2017SY	CRD	FASTmrEMMA	SNP_5_187537886	5	187537886	-0.4624	4.0917
2016SY	CRN	FASTmrEMMA	SNP_5_187773832	5	187773832	0.7711	4.9547
2017SY	CRD	FASTmrMLM	SNP_5_193364742	5	193364742	-0.2081	6.3225
2017SY	CRA	FASTmrMLM	SNP_5_195971660	5	195971660	-1.6701	4.3027
Mean	CRD	FASTmrEMMA	SNP_5_198121660	5	198121660	-0.1141	4.9055
Mean	CRN	FASTmrEMMA	SNP_5_205397268	5	205397268	-0.5968	4.2521
2016SY	CRD	FarmCPU	5:205610426	5	205610426	-0.231749		12.1139
2016SY	CRD	FASTmrMLM	SNP_5_206661137	5	206661137	0.1512	7.5042
2015SY	CRD	FASTmrEMMA	SNP_5_214609240	5	214609240	0.2409	3.245
2015SY	CRN	FASTmrMLM	SNP_5_217011007	5	217011007	0.4837	6.9168
2017SY	CRA	FASTmrMLM	SNP_6_1077629	6	1077629	-1.9473	3.0562
Mean	CRA	FASTmrMLM	SNP_6_1077629	6	1077629	-1.3259	7.0909
2015SY	CRN	FASTmrMLM	SNP_6_6030732	6	6030732	-0.5569	3.4172
2016SY	CRA	FASTmrMLM	SNP_6_13388202	6	13388202	-0.8858	3.0656
Mean	CRN	FASTmrMLM	SNP_6_26478333	6	26478333	0.4527	10.3516
2016SY	CRA	FASTmrMLM	SNP_6_37161403	6	37161403	0.6164	3.5759
Mean	CRA	FarmCPU	6:46753111	6	46753111	-1.58597		7.13846
2016SY	CRN	FASTmrMLM	SNP_6_56950463	6	56950463	-0.5236	8.6016
Mean	CRN	FASTmrMLM	SNP_6_66741493	6	66741493	-0.4115	7.1096
2016SY	CRD	FASTmrMLM	SNP_6_68175755	6	68175755	0.103	7.7807
Mean	CRN	FASTmrMLM	SNP_6_82496963	6	82496963	0.2116	3.7675
2016SY	CRA	FASTmrMLM	SNP_6_84209475	6	84209475	0.5974	5.1018
2016SY	CRN	FarmCPU	6:88233608	6	88233608	-0.401989		6.64139
2017SY	CRA	FASTmrMLM	SNP_6_91103187	6	91103187	1.1001	3.0075
Mean	CRD	FASTmrMLM	SNP_6_93046352	6	93046352	0.058	4.3527
Mean	CRD	FASTmrMLM	SNP_6_99325758	6	99325758	0.0652	5.7183
2015SY	CRN	FASTmrMLM	SNP_6_105600792	6	105600792	-0.2855	3.3172
2016SY	CRD	FASTmrEMMA	SNP_6_112539707	6	112539707	0.3219	10.3101
2016SY	CRD	FASTmrMLM	SNP_6_112539707	6	112539707	0.1301	11.1917
2016SY	CRN	FASTmrMLM	SNP_6_115160711	6	115160711	0.3373	3.5264
2016SY	CRA	FASTmrMLM	SNP_6_125819593	6	125819593	0.6238	4.5884
2016SY	CRA	FarmCPU	6:131852487	6	131852487	0.58537		5.4354
2016SY	CRN	FASTmrMLM	SNP_6_140298004	6	140298004	0.4072	6.351
2015SY	CRN	FASTmrMLM	SNP_6_145025334	6	145025334	-0.4111	3.8999
Mean	CRN	FASTmrMLM	SNP_6_146642094	6	146642094	-0.3799	6.7827
2016SY	CRN	FASTmrEMMA	SNP_6_146692801	6	146692801	0.773	4.051
2016SY	CRA	FASTmrMLM	SNP_6_148174670	6	148174670	0.5281	6.2586
2017SY	CRN	FASTmrMLM	SNP_6_150020790	6	150020790	0.2649	4.0833
Mean	CRN	FASTmrMLM	SNP_6_150020790	6	150020790	0.1049	3.1218
2016SY	CRD	FASTmrEMMA	SNP_6_150685316	6	150685316	0.1481	4.8284
2017SY	CRN	FASTmrMLM	SNP_6_150968433	6	150968433	0.3782	4.0772
2016SY	CRN	FASTmrMLM	SNP_6_157544999	6	157544999	0.3332	4.3004
Mean	CRN	FASTmrMLM	SNP_6_158107409	6	158107409	0.3596	9.7945
2017SY	CRN	FASTmrEMMA	SNP_6_159822451	6	159822451	-0.6765	3.2118
Mean	CRA	FASTmrMLM	SNP_6_162885597	6	162885597	0.4835	4.7117
Mean	CRN	FASTmrMLM	SNP_6_166588931	6	166588931	-0.216	3.6427
Mean	CRN	FASTmrMLM	SNP_7_2923512	7	2923512	-0.2459	4.3443
2016SY	CRN	FarmCPU	7:10115216	7	10115216	0.347778		5.46862
2016SY	CRD	FASTmrMLM	SNP_7_10166816	7	10166816	-0.0809	5.3111
2016SY	CRD	FASTmrMLM	SNP_7_11192612	7	11192612	0.0622	3.7231
Mean	CRD	FASTmrMLM	SNP_7_19289197	7	19289197	-0.0655	4.564
2017SY	CRN	FASTmrMLM	SNP_7_80129914	7	80129914	-0.398	4.2819
2015SY	CRD	FASTmrMLM	SNP_7_92360549	7	92360549	0.167	6.8863
2017SY	CRN	FASTmrMLM	SNP_7_102099674	7	102099674	-0.8359	6.1716
2016SY	CRA	FASTmrEMMA	SNP_7_103946580	7	103946580	2.0326	4.6976
2016SY	CRA	FarmCPU	7:107264341	7	107264341	0.901903		12.9791
Mean	CRA	FASTmrMLM	SNP_7_126858169	7	126858169	1.0127	6.1536
2015SY	CRA	FASTmrMLM	SNP_7_126858227	7	126858227	1.4295	3.3227
2016SY	CRA	FASTmrMLM	SNP_7_132623788	7	132623788	0.7089	8.5099
2017SY	CRN	FASTmrMLM	SNP_7_138128053	7	138128053	0.3942	3.0523
2017SY	CRD	FASTmrMLM	SNP_7_146410423	7	146410423	0.1279	4.0329
2017SY	CRN	FASTmrMLM	SNP_7_148363314	7	148363314	0.5286	4.635
2016SY	CRD	FASTmrMLM	SNP_7_153289091	7	153289091	-3.4587e-05	5.3099
2016SY	CRN	FASTmrMLM	SNP_7_158500335	7	158500335	0.2194	4.402
2016SY	CRA	FarmCPU	7:166026010	7	166026010	-2.16697		5.4893
Mean	CRD	FASTmrMLM	SNP_7_169494973	7	169494973	-0.0593	7.0855
Mean	CRA	FASTmrEMMA	SNP_7_172301300	7	172301300	2.3551	3.7903
Mean	CRD	FASTmrMLM	SNP_7_173220992	7	173220992	0.0774	5.4482
2017SY	CRD	FASTmrMLM	SNP_7_173609433	7	173609433	0.1668	4.1232
2017SY	CRN	FASTmrEMMA	SNP_7_175781987	7	175781987	-1.1071	6.2044
2017SY	CRN	FASTmrMLM	SNP_7_175781987	7	175781987	-0.351	4.7086
2017SY	CRA	FASTmrEMMA	SNP_8_69577	8	69577	4.2158	4.3816
2016SY	CRN	FASTmrMLM	SNP_8_19507228	8	19507228	0.4518	6.376
2016SY	CRD	FASTmrMLM	SNP_8_28739061	8	28739061	0.0999	7.1405
2017SY	CRD	FASTmrMLM	SNP_8_28747593	8	28747593	0.2608	7.1282
2017SY	CRD	FASTmrMLM	SNP_8_44068544	8	44068544	0.2004	4.832
2016SY	CRN	FASTmrMLM	SNP_8_44330697	8	44330697	-0.2555	4.8444
2016SY	CRA	FASTmrMLM	SNP_8_57595514	8	57595514	0.377	3.3956
2016SY	CRD	FASTmrMLM	SNP_8_60645802	8	60645802	0.0987	9.3803
2016SY	CRA	FASTmrEMMA	SNP_8_71098050	8	71098050	-1.1681	5.1577
2016SY	CRD	FarmCPU	8:76036883	8	76036883	-0.0860221		7.57146
2017SY	CRD	FASTmrMLM	SNP_8_102114774	8	102114774	-0.1513	4.7936
2016SY	CRN	FarmCPU	8:104146181	8	104146181	0.454124		5.76313
2016SY	CRN	FASTmrMLM	SNP_8_104966220	8	104966220	-0.4615	8.7536
2015SY	CRA	FASTmrMLM	SNP_8_107253067	8	107253067	-1.4298	3.2705
2017SY	CRA	FASTmrMLM	SNP_8_122046850	8	122046850	2.1483	8.7086
Mean	CRN	FASTmrMLM	SNP_8_132970885	8	132970885	-0.1993	4.5843
2016SY	CRD	FASTmrMLM	SNP_8_151668616	8	151668616	-0.0027	3.7165
Mean	CRD	FarmCPU	8:169995675	8	169995675	-0.251845		13.9377
2016SY	CRD	FarmCPU	8:169995675	8	169995675	-0.144247		5.40982
2015SY	CRA	FarmCPU	8:173266113	8	173266113	-0.125598		7.38798
2017SY	CRN	FASTmrMLM	SNP_8_173728606	8	173728606	-0.3744	3.527
2017SY	CRN	FASTmrMLM	SNP_9_3940095	9	3940095	-0.3011	4.6523
2016SY	CRD	FASTmrMLM	SNP_9_7180107	9	7180107	-0.0001	3.4903
2016SY	CRD	FASTmrMLM	SNP_9_11715568	9	11715568	-0.0029	3.1826
2016SY	CRN	FASTmrMLM	SNP_9_11715568	9	11715568	0.4052	5.3087
Mean	CRA	FASTmrMLM	SNP_9_14583536	9	14583536	-0.6702	5.029
Mean	CRA	FarmCPU	9:23579864	9	23579864	0.942884		8.1712
2016SY	CRN	FASTmrEMMA	SNP_9_43967580	9	43967580	-0.7451	5.1455
2016SY	CRN	FarmCPU	9:45947817	9	45947817	0.514962		8.63318
2015SY	CRD	FASTmrMLM	SNP_9_48536822	9	48536822	-0.135	3.2257
Mean	CRA	FarmCPU	9:58276777	9	58276777	0.885301		6.44875
2017SY	CRN	FASTmrMLM	SNP_9_84167922	9	84167922	-0.3967	4.015
Mean	CRN	FASTmrMLM	SNP_9_84167993	9	84167993	-0.3598	7.9301
2016SY	CRN	FASTmrEMMA	SNP_9_84205355	9	84205355	0.7973	3.7194
2016SY	CRN	FASTmrMLM	SNP_9_84205355	9	84205355	0.4244	6.6292
2017SY	CRA	FASTmrMLM	SNP_9_84245934	9	84245934	-1.5139	4.9104
Mean	CRA	FASTmrMLM	SNP_9_104689176	9	104689176	-0.4854	4.2847
2016SY	CRA	FASTmrMLM	SNP_9_108240466	9	108240466	0.5574	3.3318
2017SY	CRA	FASTmrMLM	SNP_9_124673876	9	124673876	2.6041	7.2681
Mean	CRA	FASTmrMLM	SNP_9_124673933	9	124673933	0.8947	4.6885
2016SY	CRN	FASTmrMLM	SNP_9_135746593	9	135746593	-0.4172	5.1786
Mean	CRN	FASTmrMLM	SNP_9_141028857	9	141028857	0.3378	6.1775
2016SY	CRD	FASTmrMLM	SNP_9_148956154	9	148956154	0.5254	6.7773
2016SY	CRN	FASTmrMLM	SNP_9_148956257	9	148956257	1.4933	3.5508
2015SY	CRD	FASTmrEMMA	SNP_9_152239467	9	152239467	-0.1968	3.9092
2017SY	CRN	FASTmrMLM	SNP_9_152760005	9	152760005	-0.5786	4.7085
2017SY	CRD	FASTmrMLM	SNP_9_156232348	9	156232348	0.1902	5.7965
Mean	CRD	FASTmrMLM	SNP_9_156232348	9	156232348	0.1074	6.4314
2017SY	CRN	FASTmrEMMA	SNP_10_4729497	10	4729497	1.1916	3.5001
Mean	CRN	FASTmrMLM	SNP_10_4729497	10	4729497	-0.4088	7.4156
2015SY	CRN	FASTmrEMMA	SNP_10_14167319	10	14167319	1.1948	3.2266
2017SY	CRA	FASTmrMLM	SNP_10_14724988	10	14724988	1.3741	3.6198
2015SY	CRD	FASTmrMLM	SNP_10_15214362	10	15214362	-0.0624	3.6162
2017SY	CRN	FASTmrMLM	SNP_10_18942728	10	18942728	-0.7597	8.558
Mean	CRA	FASTmrMLM	SNP_10_53277803	10	53277803	1.1827	9.3084
Mean	CRA	FASTmrMLM	SNP_10_60750859	10	60750859	0.7676	3.3961
2015SY	CRD	FASTmrMLM	SNP_10_83708041	10	83708041	-0.1492	5.4746
2015SY	CRN	FASTmrMLM	SNP_10_91539115	10	91539115	0.7305	5.6688
Mean	CRN	FASTmrMLM	SNP_10_94200679	10	94200679	-0.206	3.0314
Mean	CRD	FASTmrEMMA	SNP_10_97930181	10	97930181	0.1371	5.2152
2017SY	CRA	FASTmrMLM	SNP_10_117747929	10	117747929	-1.4516	4.1742
Mean	CRA	FASTmrMLM	SNP_10_117747965	10	117747965	-0.6049	4.8091
2015SY	CRN	FASTmrMLM	SNP_10_117946210	10	117946210	0.6757	5.7541
Mean	CRA	FarmCPU	10:120362893	10	120362893	-0.916847		5.92999
2016SY	CRA	FASTmrEMMA	SNP_10_120671481	10	120671481	1.0632	3.0005
2016SY	CRD	FarmCPU	10:121242877	10	121242877	0.753736		5.96559
2016SY	CRD	FASTmrMLM	SNP_10_125502748	10	125502748	-0.0878	3.8225
Mean	CRD	FarmCPU	10:130986907	10	130986907	-0.870742		9.65361
2016SY	CRN	FarmCPU	10:144613372	10	144613372	-0.153817		8.66614
Mean	CRN	FASTmrMLM	SNP_10_149527612	10	149527612	0.3421	5.3039

## Sheet: Table S2
Table S2. The list of candidate genes located within the ± 50-kb genomic regions of the identified SNPs
id	Gene	Chr	Pos.left	Pos.right	Trait	Position	SNP	Best homologous gene in rice	Annotation in rice	Expression values (FPKMs) for all tissues
										Root	Leaf	shoot	Tassel	Seed	Endo	Emb	Primary_Root_3DAS	Root_MZ_and_EZ_3DAS	Root_DZ_3DAS	Root_CP_3DAS	Root_Stele_3DAS	Primary_Root_GH_6DAS	Root_System_7DAS	Primary_Root_7DAS	Seminal_Roots_7DAS	Primary_Root_Z1_7DAS	Primary_Root_Z2_7DAS	Primary_Root_Z3_7DAS	Primary_Root_Z4_7DAS	Crown_Roots_Nodes1-3_V7	Crown_Roots_Node4_V7	Crown_Roots_Node5_V7	Crown_Roots_Node5_V13	Brace_Roots_Node6_V13	Coleoptile_GH_6DAS	Pooled_Leaves_V1	Topmost_Leaf_V3	Shoot_Tip_V5	Tip_Stage2_ Leaf_V5	Base_Stage2_Leaf_V5	Tip_Stage2_Leaf_V7	Base_Stage2_Leaf_V7	Eighth_Leaf_V9	Eleventh_Leaf_V9	Thirteenth_Leaf_V9	Immature_Leaves_V9	Thirteenth_Leaf_VT	Thirteenth_Leaf_R2	Leaf_0DAP
1	GRMZM2G025642	1	5629470	5636419	CRN_2015SY	5680658	SNP_1_5680658	LOC_Os03g03540.1	no apical meristem protein, putative, expressed	4.73222	1.4245	2.281	1.15167	0.135	0	0	4.36	8.97	0	0.92	0	4.53	6.48	6.19	1.57	4.18	6.09	11.65	3.03	6.4	8.67	3.2	5.64	3.3	2.52	0	0	2.42	0	3.36	0	4.18	0	0	0	16.01	0	0	0
2	AC217946.3_FG005	1	5649338	5652073	CRN_2015SY	5680658	SNP_1_5680658			0	0	0	0	0	0	0	0	0	0	0	0	0	0	0	0	0	0	0	0	0	0	0	0	0	0	0	0	0	0	0	0	0	0	0	0	0	0	0	0
3	GRMZM2G319022	1	5713200	5734294	CRN_2015SY	5680658	SNP_1_5680658	LOC_Os04g34720.1	PHD-finger domain containing protein, putative, expressed	39.89	59.433	60.437	68.1183	99.915	142.349	89.385	31.24	44.05	27.97	30.59	40.5	32.75	33.92	35.03	21.2	38.04	32.77	38.24	36.96	50.52	47.38	42.02	61.02	73.82	52.37	57.85	48.75	60.9	63.53	39.18	68.83	48.26	44.94	42.76	36.94	28.23	63.49	51.61	63.7
4	GRMZM2G140302	1	14300150	14300705	CRA_2016SY	14347684	SNP_1_14347684			0	0	0	0	74.0017	10.4	0.36	0	0	0	0	0	0	0	0	0	0	0	0	0	0	0	0	0	0	0	0	0	0	0	0	0	0	0	0	0	0	0	0	0
5	GRMZM2G417835	1	14384375	14385993	CRA_2016SY	14347684	SNP_1_14347684	LOC_Os01g59410.1	VQ motif family protein, expressed	0.330556	175.684	143.094	113.723	105.491	0.364286	23.6083	0	0	0	0	0	0	0	1.92	0	0	0	2.21	1.82	0	0	0	0	0	0	25.3	161.35	79.37	287.6	64.32	373.57	135.96	458.49	342.81	266.51	104.58	177.32	194.53	271.37
6	GRMZM2G002002	1	20281253	20291576	CRA_2016SY	20278532	SNP_1_20278532	LOC_Os03g11240.1	nucleotidyltransferase, putative, expressed	35.0772	43.71	40.142	55.7583	51.6442	56.4814	45.8817	36	44.17	27.04	40.06	34.85	34.63	33.71	35.47	22.33	42.38	34.78	36.75	36.71	35.93	35.67	26.93	34.6	39.38	53.65	54.1	39.04	46.13	47.06	41.99	54.67	51.74	43.81	38.72	37.93	44.14	43.64	37.47	51.67
7	GRMZM2G055263	1	37809278	37810975	CRD_2016SY	37853195	SNP_1_37853195	LOC_Os03g15680.1	nodulation-signaling pathway 2 protein, putative, expressed	9.89722	0	0	0	0	0	0	18.03	6.75	13.75	34	0	8.6	19.08	18.77	14.66	9.59	7.71	11.01	11.07	2.08	2.23	0	0.82	0	0	0	0	0	0	0	0	0	0	0	0	0	0	0	0
8	GRMZM2G418575	1	37843197	37845477	CRD_2016SY	37853195	SNP_1_37853195	LOC_Os01g56820.1	AGAP000951-PA, putative, expressed	0	0	0	0	3.18	8.73571	0	0	0	0	0	0	0	0	0	0	0	0	0	0	0	0	0	0	0	0	0	0	0	0	0	0	0	0	0	0	0	0	0	0
9	GRMZM2G118208	1	37846459	37854844	CRD_2016SY	37853195	SNP_1_37853195	LOC_Os03g15690.1	phosphate carrier protein, mitochondrial precursor, putative, expressed	44.2206	66.078	65.643	48.1317	107.641	217.676	103.752	39.29	70.58	42.42	42.77	29.11	45.29	38.59	36.62	24.13	59.71	37.6	36.56	40.85	38.07	42	48.8	48.2	75.38	64.69	86.44	68.14	78.76	90.19	55.78	73.05	40.87	63.08	29.41	21.99	27.06	95.34	72.42	110.45
10	GRMZM2G100620	1	37875667	37879128	CRD_2016SY	37853195	SNP_1_37853195	LOC_Os03g15700.1	splicing factor 3A subunit 2, putative, expressed	159.698	165.047	176.998	205.707	255.465	441.934	201.788	164.94	190.97	175.66	164.58	158.12	162.83	165.68	162.44	110.03	155.85	154.78	133.75	136.66	165.33	164.97	180.71	149.92	177.35	235	161.86	138.41	238.78	134.06	213.15	165.32	260.2	135.48	105.11	131.07	208.93	154.36	144.85	158.47
11	GRMZM2G012319	1	38540863	38552713	CRA_2015SY	38546338	SNP_1_38546338	LOC_Os03g15900.2	SH3 domain containing protein, expressed	213.447	119.216	163.68	191.335	253.268	379.466	152.235	257.77	421.53	142.84	209.44	238.68	320.43	172.62	168.74	131.69	387.85	168.65	204.85	121.59	142.21	159.91	164.64	172.46	256.15	348.76	75.34	89.93	194.69	53.85	236.31	49.58	252.87	57.81	74.03	99.17	197.07	70.05	77.22	73.05
12	GRMZM2G012566	1	38552479	38555256	CRA_2015SY	38546338	SNP_1_38546338	LOC_Os03g15920.1	expressed protein	43.8156	48.748	36.2	100.158	27.8183	20.1629	16.9817	49.56	0	103.58	128.82	105.8	2.47	33.17	20.5	12.88	0.88	12.67	19.68	45.26	15.33	9.19	21.85	82.45	124.59	5.5	17.45	44.28	27.04	137.13	26.28	16.92	16.55	41.62	49.39	54.25	18.04	34.13	43.92	35.42
13	AC217897.3_FG010	1	38553316	38553723	CRA_2015SY	38546338	SNP_1_38546338	LOC_Os03g15910.1	membrane protein, putative, expressed	0.217222	1.025	0.141	0	0	0.847143	3.80167	0	0	0	0	0	0	0	0.43	0.35	0	0	0	0	2.55	0	0.13	0.45	0	0	0	0	0	8	0	0	0	8.03	4.47	0	0	0	0	0
14	GRMZM2G380955	1	45094543	45097600	CRA_2016SY	45113031	SNP_1_45113031	LOC_Os10g30850.2	zinc finger, RING-type, putative, expressed	24.2989	16.64	29.348	30.1567	58.3383	108.659	37.0333	23.56	28.92	15.77	39.06	34.12	30.95	15.79	14.18	10.01	46.97	28.88	23.69	18.35	18.51	21.51	19.48	22.55	25.08	32.68	11.86	9.88	34.27	0	23.98	15.74	32.21	5.58	27.35	26.25	41.43	5.22	15.41	6.54
15	AC208436.3_FG007	1	45103542	45110167	CRA_2016SY	45113031	SNP_1_45113031	LOC_Os07g49290.1	PHD finger family protein, putative, expressed	2.07389	2.09	3.794	18.655	7.54167	6.14143	17.6583	2.29	4.44	1.22	1.71	2.2	2.84	1.54	2.25	0.8	4.11	2.8	1.64	0.79	1.55	1.2	1.31	1.42	3.22	9.6	0.36	1.27	9.36	0	4.41	1.36	11.97	0	0	0	3.47	0	0	0
16	GRMZM2G053669	1	45118780	45122813	CRA_2016SY	45113031	SNP_1_45113031	LOC_Os03g18130.1	asparagine synthetase, putative, expressed	514.984	116.43	20.112	145.515	16.5358	0.297143	5.29	1279.64	23.36	915.45	3274.49	50.69	1505.61	382.05	304.42	91.75	29.44	74.91	207.61	369.35	129.44	99.29	80.36	71.74	380.12	1378.38	6.62	5.39	18.49	5.57	0	2.57	0	3.13	0	0	0	10.32	3.96	13.21
17	GRMZM2G092442	1	49389260	49391362	CRN_2017SY;CRA_Mean	49374399	SNP_1_49374399;SNP_1_49386674	LOC_Os03g19452.1	SMP-30/Gluconolaconase/LRE domain protein, putative, expressed	28.3794	8.283	8.485	10.335	5.88083	3.30857	17.66	41.86	83.21	12.15	26.44	0.95	33.19	32.44	29.34	24.28	63.58	6.1	28.76	10.11	16.13	21.56	32.24	18.94	29.55	21.35	0	5.65	15.64	0	33.72	0	47.23	0	0	0	42.07	0	0	0
18	GRMZM2G043484	1	49403087	49413070	CRN_2017SY;CRA_Mean	49374399	SNP_1_49374399;SNP_1_49386674	LOC_Os03g19480.1	SET domain containing protein, expressed	25.925	15.5375	42.523	22.6117	30.4675	24.7729	29.11	28.8	16.79	26.32	35.8	41.63	30.58	21.96	25.29	17.18	16.01	23.56	21.89	29.56	21.89	24.45	26.5	26.81	31.63	20.55	9.68	8.28	25.86	5.69	12.73	12.4	17.05	13.52	19.59	16.3	13.33	12.19	10.12	15.26
19	GRMZM2G174680	1	52623482	52624713	CRD_2016SY	52631817	SNP_1_52631817	LOC_Os03g20760.1	LTPL66 - Protease inhibitor/seed storage/LTP family protein precursor, expressed	0.269444	9.445	0.29	19.8017	5.95167	0.602857	3.48667	0	0	0	0	0	0	0	1.77	0	0	0	0	0	0	0	0	3.08	0	17.12	0	16.01	0	0	14.67	0	0	0	27.15	35.06	78.89	0	0	0
20	GRMZM2G174696	1	52632959	52640963	CRD_2016SY	52631817	SNP_1_52631817	LOC_Os03g20750.1	outer mitochondrial membrane porin, putative, expressed	107.984	67.8645	90.067	90.5767	133.024	231.559	158.618	131.12	268.83	71.96	63.74	77.68	158.41	76.27	64.88	58.85	202.36	99.59	89.37	39.7	78.02	87.28	127.56	97.13	150.97	219.26	53.56	68.35	141.77	60.31	125.05	54.49	110.99	29.66	45.62	48.09	55.23	38.45	29.24	42.73
21	AC215638.3_FG007	1	56886742	56892183	CRA_2016SY;CRA_2016SY	56897538	SNP_1_56897538;SNP_1_56897538			0	0	0	0	0	0	0	0	0	0	0	0	0	0	0	0	0	0	0	0	0	0	0	0	0	0	0	0	0	0	0	0	0	0	0	0	0	0	0	0
22	GRMZM2G069618	1	56894719	56897083	CRA_2016SY;CRA_2016SY	56897538	SNP_1_56897538;SNP_1_56897538	LOC_Os03g22140.1	tetratricopeptide repeat domain containing protein, expressed	140.747	82.2885	94.501	108.145	88.9158	84.2857	87.93	186.99	250.63	121.21	159.46	168.45	150.02	139.8	143.83	105.99	191.84	95.5	145.34	121.9	105.15	97.63	113.13	117.38	119.19	158.07	52.31	84.02	86.6	46.09	148.16	39.05	105.37	55.92	109.44	144.13	164.68	45.82	86.62	49.48
23	GRMZM2G353147	1	56946949	56985741	CRA_2016SY;CRA_2016SY	56897538	SNP_1_56897538;SNP_1_56897538	LOC_Os03g22160.1	relA-SpoT like protein RSH1, putative, expressed	14.1394	75.161	29.181	33.51	30.1542	35.9971	27.7383	13.2	13.55	10.07	17.09	10.23	10.47	12.08	14.76	8.62	14.09	12.94	13.89	15.17	17.39	15.98	12.25	17.6	25.13	17.12	137.41	115.49	16.01	189.2	37.82	178.59	26.44	56.73	43.91	43.24	29.31	77.42	64.44	76.34
24	GRMZM2G083689	1	59063103	59089085	CRN_2017SY	59031038	SNP_1_59031038	LOC_Os03g22570.2	MIF4G domain containing protein, putative, expressed	122.407	117.225	174.321	179.172	244.767	363.437	271.328	125.55	200.99	81.67	86.81	106.48	158.69	100.75	100.31	70.87	204.71	135.89	112.97	87.09	109.51	117.97	104.41	125.2	173.46	250.05	62.85	66.58	232.15	94.03	160.34	52.22	169.68	57.41	81.63	78.31	84.63	105.33	106.08	70.88
25	GRMZM2G400352	1	59307116	59371932	CRA_Mean;CRA_2016SY	59370381	1:59370381;1:59370539	LOC_Os01g55650.1	phospholipase, patatin family, putative, expressed	0.113333	1.833	1.91	2.76833	2.67667	2.57857	4.235	0	0.09	0	0.05	0	0.81	0	0.18	0	0.05	0	0.02	0.24	0	0.04	0.07	0	0.49	2.66	0	1.7	1.98	1.32	1.71	2.78	2.4	0.14	0.15	0	0.9	1.23	1.1	1.61
26	GRMZM2G065215	1	73696272	73700329	CRN_2017SY	73741723	SNP_1_73741723	LOC_Os03g30740.1	expressed protein	0.0783333	0.1045	0.426	7.22333	2.77583	0	0.116667	0	0	0	0	0	0	0	0.61	0	0.18	0	0	0	0	0.38	0.24	0	0	0.78	0	0	0.76	0	0	0	0.55	0	0	0	0	0	0	0
27	GRMZM2G021427	1	91469057	91470883	CRA_Mean	91497038	SNP_1_91497038	LOC_Os10g40720.1	expansin precursor, putative, expressed	303.483	15.3935	17.964	186.743	11.7617	0	3.31833	422.05	709.15	80.69	555.81	220.13	368.1	351.11	235.7	204.33	556.5	31.29	496.15	209.84	84.53	115.06	162.32	123.67	536.27	111.38	30.98	48.71	0	14.12	22.99	59.95	1.74	0	13	0	0	0	0	0
28	GRMZM2G342246	1	91511981	91513768	CRA_Mean	91497038	SNP_1_91497038	LOC_Os10g40720.1	expansin precursor, putative, expressed	627.774	18.4945	88.245	86.605	40.5333	10.0243	11.055	101.99	2.99	340.44	215.72	4.1	108.08	1248.26	1647.53	945.69	21.05	1250.36	837.26	519.35	997.52	1849.64	678.8	474.41	56.75	50.29	97.76	109.67	3.52	61.33	23.15	16.2	0	2.99	0	0	0	0	0	0
29	GRMZM2G367023	1	98327351	98335355	CRD_2017SY	98352220	SNP_1_98352220	LOC_Os10g42439.1	heat shock protein DnaJ, putative, expressed	44.2333	49.1705	39.258	65.96	57.8742	69.3943	37.8717	58.82	65.15	28.38	88.83	70.31	52.31	29.26	28.74	19.47	78.21	56.78	54.4	33.55	19.48	30.71	8.92	23.68	49.2	61.24	77.18	46.02	44.35	27.19	61.99	58.05	65.46	28.91	29.49	58.85	110.63	45.25	55.32	43.03
30	GRMZM2G001895	1	98344349	98360337	CRD_2017SY	98352220	SNP_1_98352220	LOC_Os10g42439.1	heat shock protein DnaJ, putative, expressed	79.7778	71.334	72.934	93.0967	94.3442	130.211	55.69	91.53	101.39	72.22	111.38	92.03	79.05	76.76	76.96	51.86	91.29	77.57	77.66	68.92	59.55	72.03	62.91	74.56	98.33	80.14	91.07	62.54	66.29	51.93	77.49	86.33	86.74	57.87	62.38	73.25	92.7	77.38	72.79	61.15
31	GRMZM2G001930	1	98363081	98365897	CRD_2017SY	98352220	SNP_1_98352220	LOC_Os10g42430.1	transcription factor MYC7E, putative, expressed	108.762	108.604	111.729	93.2	56.95	61.4029	71.0383	89.95	57.38	161.15	133.67	73.6	121.48	120.25	112.47	71.41	56.44	101.45	106.73	315.34	116.56	100.03	101.23	82.53	36.05	97.33	59.41	54.22	74.25	35.29	58.66	30.37	62.4	253.89	259.06	323.29	153.14	183.12	124.12	58.96
32	GRMZM2G032171	1	119006832	119031391	CRN_2016SY	118969980	1:118969980	LOC_Os11g18947.1	zinc finger, C3HC4 type domain containing protein, expressed	60.6261	60.026	85.405	52.675	60.3517	42.5514	59.3333	44.85	29.78	57.61	66.4	52.19	45.91	68.29	84.39	43.76	34.15	63.82	54.59	95.66	79.43	70.22	66.29	83.84	50.09	40.02	41.18	45.64	47.26	46.19	22.2	77.02	31.45	83.22	57.5	40.16	28.9	62.63	70.22	88.69
33	GRMZM2G137786	1	159968117	160031617	CRD_2016SY	160052502	SNP_1_160052502	LOC_Os11g18194.1	cycloartenol synthase, putative, expressed	0	0	0.366	1.74	22.0392	0	0.06	0	0	0	0	0	0	0	0	0	0	0	0	0	0	0	0	0	0	0	0	0	0	0	0	0	0	0	0	0	0	0	0	0
34	GRMZM2G333377	1	160072932	160078557	CRD_2016SY;CRD_2015SY	160052502	SNP_1_160052502;SNP_1_160107745	LOC_Os06g13250.1	hypothetical protein	0.0588889	0.0625	0.06	0.0666667	0.395	0.861429	0.1	0.03	0.02	0.03	0.05	0.07	0.13	0.04	0.05	0.03	0.07	0.03	0.03	0.07	0.04	0.09	0.08	0.08	0.12	0.1	0.03	0.02	0.02	0.07	0.03	0.01	0.07	0.04	0.13	0.11	0	0	0.02	0.12
35	AC186506.3_FG001	1	160142897	160143561	CRD_2015SY	160107745	SNP_1_160107745			0	0	0	0	0	0	0.381667	0	0	0	0	0	0	0	0	0	0	0	0	0	0	0	0	0	0	0	0	0	0	0	0	0	0	0	0	0	0	0	0	0
36	GRMZM2G121502	1	160143077	160143849	CRD_2015SY	160107745	SNP_1_160107745			0	0	0	0	0	0	1.68667	0	0	0	0	0	0	0	0	0	0	0	0	0	0	0	0	0	0	0	0	0	0	0	0	0	0	0	0	0	0	0	0	0
37	GRMZM5G860569	1	177450137	177450757	CRD_2015SY;CRD_2015SY	177406418	SNP_1_177406418;SNP_1_177406418			0	0	0	0	0	0	0	0	0	0	0	0	0	0	0	0	0	0	0	0	0	0	0	0	0	0	0	0	0	0	0	0	0	0	0	0	0	0	0	0
38	GRMZM2G419267	1	187224319	187227767	CRA_Mean	187222914	SNP_1_187222914	LOC_Os08g39380.1	beta 1,2-xylosyltransferase, putative, expressed	38.7806	22.1975	40.217	34.6583	26.9517	11.3243	41.8633	50.21	69.25	34.41	23.64	53.09	46.49	35.06	34.33	24.66	52.93	29.56	35.07	19.99	29.15	33.18	44.25	38.96	43.82	53.66	7.04	13.86	42.34	7.6	50.35	7.59	50.39	7.85	30.56	34.12	50.07	2.63	6.94	13.75
39	GRMZM2G179703	1	202955872	202958418	CRA_2017SY	202961895	SNP_1_202961895	LOC_Os08g44840.1	transferase family protein, putative, expressed	19.5194	177.165	58.642	497.183	180.387	21.99	134.502	7.93	0	13.92	14.42	0	13.26	53.71	44.85	22.97	2.82	32.47	27.73	63.07	8.42	15.37	10.07	15.85	4.49	299.65	73.89	241.38	55.25	70.15	606.72	65.69	472.01	114.59	139.44	257.22	924.15	85.93	45.93	28.5
40	GRMZM5G869779	1	226063076	226070426	CRA_Mean	226062685	1:226062685	LOC_Os10g35940.1	folylpolyglutamate synthetase, putative, expressed	10.0706	28.5635	33.254	23.5917	18.8533	26.0971	28.0633	11.4	26.65	7.08	5.66	8.72	12.5	6.68	5.9	5.18	18.21	9.99	6.5	2.39	8.7	7.43	9.89	9.77	18.62	22.73	40.75	55.42	19.7	58.36	23.32	53.78	22.8	12.76	13.03	17.96	9.02	13.98	12.97	20.81
41	GRMZM2G071304	1	229127579	229134479	CRN_Mean	229139297	SNP_1_229139297	LOC_Os10g34750.1	LIG1 - Putative DNA ligase I, expressed	45.4822	36.104	63.23	86.5783	81.3017	118.177	126.178	49.34	71.67	45.08	35.56	47.22	61.53	47.23	42.89	35.22	68.39	59.05	37.14	29.73	36.57	38.04	37.1	32.84	44.08	105.24	14.85	31.86	110.33	36.09	51.51	16.12	88.57	7.21	19.92	21.97	26.55	5.76	14.16	8.5
42	GRMZM2G160752	1	229169748	229183094	CRN_Mean	229139297	SNP_1_229139297	LOC_Os10g34740.1	methyltransferase, putative, expressed	51.925	44.3815	63.913	73.9117	79.9533	108.811	90.9633	56.65	97.76	45.8	42.65	59.73	68.67	44.69	42.34	29.48	77.24	51.73	46.96	29.1	45.43	44.02	50.2	52.43	49.77	73.48	46.24	55.82	95.88	58.85	54.3	46.63	66.28	22.81	29.22	43.2	36.27	26.62	38.64	27.59
43	GRMZM2G404443	1	230073700	230077262	CRN_2016SY	230076132	SNP_1_230076132	LOC_Os10g34230.1	cytokinin dehydrogenase precursor, putative, expressed	72.7411	16.2725	36.474	14.905	11.9583	0.362857	0	52.2	14.14	97.57	94.73	42.18	79.24	63.62	64.52	46.39	25.71	130.06	111.26	186.11	98.61	82.91	76.51	32.37	11.21	10.61	49.71	19.65	49.95	31.26	8.1	12.42	6.91	25.12	25.92	17.77	9.65	4.23	0	10.37
44	GRMZM2G138455	1	242766583	242768989	CRN_2016SY	242768751	1:242768751	LOC_Os03g07360.1	expressed protein	21.8344	152.458	171.411	92.7967	33.7025	20.6429	33.8333	0.54	0	1.87	0.54	1.58	5.94	7.31	15.8	4.72	0.74	5.88	7.15	9.74	103.93	80.05	52.26	51.6	43.37	6.15	127.25	102.74	50.65	176.98	21.1	91.12	8.04	82.37	69.76	49.82	16.32	376.56	331.76	124.96
45	AC195608.3_FG006	1	243441745	243442158	CRA_Mean	243464929	1:243464929			0.0911111	0	0.291	0.276667	0	0	0	0	0	0	0	0	0	0	0.51	0	0	0	0	0	0	0	0	0	1.13	0	0	0	0	0	0	0	0	0	0	0	0	0	0	0
46	AC195608.3_FG005	1	243456747	243457412	CRA_Mean	243464929	1:243464929			0.137778	0	0.278	0.21	0	0	0.155	0	0	0	0	0	0	0	0.39	0	0.36	0	0	0	0	0	0.49	0	1.24	0	0	0	0	0	0	0	0	0	0	0	0	0	0	0
47	GRMZM2G020073	1	243459425	243465963	CRA_Mean	243464929	1:243464929	LOC_Os01g62440.1	ribonuclease protein, putative, expressed	0.246667	0.392	0.439	0.276667	0.559167	0.908571	0.721667	0.2	0.45	0.21	0.44	0.25	0.7	0.11	0.16	0	0.07	0.14	0.3	0.12	0.26	0.12	0.14	0.14	0.63	1.16	1.07	1.09	0.1	1.01	0.43	1.49	0.18	0	0	0	0	0	0	0
48	GRMZM2G409133	1	243500245	243505085	CRA_Mean	243464929	1:243464929	LOC_Os10g26400.1	uncharacterized oxidoreductase, putative, expressed	54.815	410.402	40.382	53.9317	32.27	33.4443	50.8283	110.27	51.47	150.89	206.71	38.96	41.75	36.52	39.03	31.05	39.14	36.51	29.21	27.99	13.63	13.37	36.24	34.26	49.67	36.84	567.58	426.86	37.65	890.72	83.82	554.76	57.34	347.9	215.12	172.51	82.05	771.23	480.56	703.85
49	GRMZM2G092899	1	247072427	247073761	CRN_Mean	247104265	SNP_1_247104265			4.99278	4.183	9.569	30.7417	9.32417	14.72	6.83833	5.3	3.2	4.22	5.09	8.97	7.63	4.89	4.8	1.45	6.03	4.67	4.8	5.93	5.59	5.53	1.89	5.3	4.58	9.13	4.63	7.5	1.06	0	8.67	3.4	10.28	0	4.35	3.33	2.22	0	4.03	0
50	GRMZM2G357806	1	247081238	247082900	CRN_Mean	247104265	SNP_1_247104265	LOC_Os04g45200.2	DNA binding protein, putative, expressed	0.267222	0.05	0.374	0.113333	0.254167	0.208571	0.218333	0.24	0	0	0.36	0.12	0	0.31	0.28	0.15	0.12	0.36	0.42	0.49	0.49	0.38	0.23	0.58	0.28	0	0	0.13	0	0	0.18	0.23	0	0	0	0	0	0	0	0
51	GRMZM2G395375	1	247141122	247143976	CRN_Mean	247104265	SNP_1_247104265	LOC_Os10g24954.1	ulp1 protease family, C-terminal catalytic domain containing protein, expressed	0	0	0	0	0	0	0	0	0	0	0	0	0	0	0	0	0	0	0	0	0	0	0	0	0	0	0	0	0	0	0	0	0	0	0	0	0	0	0	0
52	GRMZM2G107120	1	258000453	258014201	CRN_2016SY	258057217	1:258057217			23.9761	95.72	58.518	44.4383	37.6725	29.3343	27.78	12.93	9.52	16.2	23.81	27.53	27.06	21.53	22.07	12.78	15.73	21.46	22.68	37.71	27.65	32.23	37.6	34.74	28.34	27.11	95.93	74.87	31.33	168.48	48.55	103.94	19.76	58.56	44.62	49.2	36.99	134.95	117.18	108.9
53	GRMZM2G703998	1	258012133	258013608	CRN_2016SY	258057217	1:258057217			0.329444	1.4335	1.098	0.176667	0.256667	0.158571	0.221667	0.44	0	0	0.34	0	0	0.16	0.12	0	0.05	0	0	0.89	1.64	0.09	1.41	0.36	0.43	0.02	3.68	1.99	0	6.31	0.28	3.74	0.42	0.29	0	0	1.27	0.65	1.69	0
54	GRMZM2G055037	1	258031062	258032910	CRN_2016SY	258057217	1:258057217	LOC_Os03g46570.1	protein binding protein, putative, expressed	21.0306	64.646	61.951	14.9717	5.3175	0	9.88	15.66	0	23.8	4.6	19.23	5.52	29.63	42.77	16.55	0	11.48	19.24	30.99	45.77	38.28	30.96	38.95	5.12	9.44	101.3	42.04	5.55	78.9	5.21	35.94	1.97	180.05	23.57	25.42	15.63	280.91	165.66	49.97
55	GRMZM2G319281	1	258035280	258037705	CRN_2016SY	258057217	1:258057217	LOC_Os03g46600.1	acidic leucine-rich nuclear phosphoprotein 32-related protein 2, putative, expressed	100.828	69.106	155.707	150.61	221.599	337.707	481.48	93.3	202.26	74.62	53.86	64.73	113.1	81.19	87.78	48.7	183.47	104.92	92.91	50.32	106.89	96.36	130.84	96.44	133.21	212.5	19.47	55.4	202.06	15.6	126.84	35.89	181.77	36.21	54.39	65.46	72.8	30.06	29.65	36.4
56	GRMZM2G044762	1	258054297	258055568	CRN_2016SY	258057217	1:258057217	LOC_Os03g46640.1	deoxyuridine 5-triphosphate nucleotidohydrolase, putative, expressed	128.244	60.906	147.129	152.047	79.7758	51.5614	469.925	132.94	207.14	146.52	37.19	77.9	209.48	148.42	123.74	105.79	150.04	213.9	122.74	17.69	94.05	107.76	191.23	127.4	94.47	201	10.48	20.72	209.54	80.89	51.58	10.73	148.55	17.78	54.83	32.34	51.29	67.75	75.71	12.69
57	GRMZM2G045314	1	258058680	258065662	CRN_2016SY	258057217	1:258057217	LOC_Os03g46650.1	WD domain, G-beta repeat domain containing protein, expressed	248.742	131.243	197.147	207.447	188.218	194.734	247.657	248.94	277.17	242.44	274.41	252.7	252.87	274.49	273.57	177.21	254.9	206.93	227.71	247.24	267.09	260.65	267.17	301.85	170.02	224.41	145.74	177.92	187	78.26	189.12	120.38	260.53	83.68	165.84	153.36	209.19	53.71	61.06	98.85
58	GRMZM2G046101	1	258105155	258107917	CRN_2016SY	258057217	1:258057217	LOC_Os03g46660.1	glucan endo-1,3-beta-glucosidase precursor, putative, expressed	61.9139	57.136	91.675	153.443	163.845	94.9729	110.583	62.86	88.41	72.69	20.46	139.35	104.51	76.19	53.69	53.97	83.37	55.69	61.86	53.77	31.6	28.16	42.28	36.42	49.17	209.89	8.72	38.32	161.12	0	169.87	1.38	209.09	2.45	27.01	35.47	276.81	0	1.55	0
59	AC211401.4_FG003	1	271251594	271252826	CRA_2016SY	271300233	SNP_1_271300233	LOC_Os03g51640.1	expressed protein	62.8444	90.969	60.535	65.1283	42.4542	15.9443	48.3633	53.34	19.93	49.86	91.08	39.04	34.24	91.21	97.78	45.31	30.12	58.08	68.71	145	78.13	67.91	48.81	66.71	45.94	44.38	74.35	87.37	48.94	99.49	63.07	140.29	60.75	91.47	118.79	112.53	88.93	67.32	86.16	120.05
60	GRMZM2G149576	1	271272971	271289468	CRA_2016SY	271300233	SNP_1_271300233	LOC_Os03g51650.1	membrane protein, putative, expressed	619.564	581.793	271.961	331.152	130.535	45.3914	143.012	923.61	645.55	1002.55	1822.92	381.3	1306.12	665.91	765.67	512.34	386.44	353.33	501.17	559.37	234.74	265.1	266.8	212.36	346.87	490.3	1164.59	274.97	27.36	260.59	43.84	682.32	44.51	679.87	434.45	339.74	130.1	282.95	478.24	854.79
61	GRMZM2G450153	1	271305954	271312404	CRA_2016SY	271300233	SNP_1_271300233	LOC_Os06g02170.1	DNAJ heat shock N-terminal domain-containing protein, putative, expressed	0	0	0	0	0	0	0	0	0	0	0	0	0	0	0	0	0	0	0	0	0	0	0	0	0	0	0	0	0	0	0	0	0	0	0	0	0	0	0	0
62	GRMZM2G101460	1	272036273	272053468	CRA_Mean	272075375	1:272075375	LOC_Os03g51790.1	GTPase of unknown function domain containing protein, putative, expressed	44.2789	48.5475	58.032	51.425	63.4658	97.7329	66.5233	40.05	52.5	36.08	34.19	44.32	42.98	43.59	48.39	27.81	46.63	42.49	41.75	47.33	52.71	50.7	49.05	45.69	50.76	48.4	50.65	33.7	47.76	47.93	25.55	58.22	52.77	57.54	19.88	28.17	26.23	59.66	67.38	59.89
63	GRMZM2G092198	1	272101204	272103668	CRA_Mean	272075375	1:272075375	LOC_Os03g51840.1	PPR repeat containing protein, expressed	6.99278	9.5705	14.644	11.5583	13.3517	16.43	17.5633	7.94	9.53	3.12	4.85	5.1	7.18	5.49	8.22	4.64	9.49	7.59	6.62	6.32	7.37	7.33	8.61	7.01	9.46	12.13	4.63	4.06	11.05	1.88	7.6	9.02	9.94	15.34	5.18	8.81	9.25	9.08	16.21	15.45
64	GRMZM5G828661	1	272106767	272108238	CRA_Mean	272075375	1:272075375			0.0783333	0.712	5.9	0	0	0	0	0	0	0	0	0	0	0	1.41	0	0	0	0	0	0	0	0	0	0	3.87	0	0	0	0	0	0	0	0	0	0	0	0	0	0
65	GRMZM2G092091	1	272109897	272113700	CRA_Mean	272075375	1:272075375	LOC_Os03g51910.1	basic helix-loop-helix protein, putative, expressed	27.6717	6.994	28.067	31.2867	14.7617	8.64	23.9717	20.89	29.15	25.07	15.36	31.39	25.54	28.03	28.09	17.4	33.82	30.11	32.08	14.53	36.18	32.17	34.75	30.54	32.99	17.86	0	1.46	81.04	0	2.87	1.75	12.58	0	0	0	1.43	0	1.62	0
66	GRMZM2G032962	1	277208093	277217953	CRN_2017SY	277217001	SNP_1_277217001	LOC_Os03g54150.1	expressed protein	34.3711	40.907	32.299	46.4833	35.5333	34.7714	59.4383	34.13	31.36	37.24	36.5	37.87	36.61	32.32	35.97	22.11	30.32	29.64	33.16	40.19	43.46	39.72	36.45	33.22	28.41	43.2	59.9	47.37	49.22	47.98	37.64	51.07	44.46	40.1	36.62	31.18	44.68	36.79	47.8	38.99
67	GRMZM2G032339	1	277218151	277298925	CRN_2017SY	277217001	SNP_1_277217001	LOC_Os03g54160.1	OsMADS14 - MADS-box family gene with MIKCc type-box, expressed	34.2744	218.606	697.985	334.505	134.528	1.23429	39.8117	0	0	0	0	0	0	0	0.15	0	0.7	0	0	0	13.92	35.69	82.3	265.04	219.14	0	0	0	0	0	0	0	0	1.83	31.36	53.39	160.39	395.11	624.59	435.39
68	GRMZM2G024051	1	277651280	277658714	CRD_Mean;CRN_2015SY	277704588	SNP_1_277704588;SNP_1_277704589	LOC_Os03g54770.1	WD domain, G-beta repeat domain containing protein, expressed	28.9417	23.2185	44.13	37.8667	36.7475	31.55	54.2433	26.28	44.04	21.48	18.8	23.71	34.35	27.4	30.24	20.86	40.02	28.02	24.85	17.61	30.95	27.8	32.39	33.99	38.16	53.86	16.89	26.97	42.17	5.55	45.02	11.16	53.19	8.22	23.33	31.29	29.18	11.99	13.1	9.34
69	GRMZM2G024231	1	277659611	277669564	CRD_Mean;CRN_2015SY	277704588	SNP_1_277704588;SNP_1_277704589	LOC_Os03g54780.1	STE_PAK_Ste20_KHSh_GCKh_HPKh.1 - STE kinases include homologs to sterile 7, sterile 11 and sterile 20 from yeast, expressed	128.487	106.498	152.289	144.75	206.933	269.83	200.225	122.3	190.96	98.49	115.87	95.72	128.41	102.79	109.49	76.95	185.32	104.11	125.67	115.03	140.13	140	159.93	125.55	176.04	152.01	86.22	80.47	138	87.35	143.24	75.38	148.89	76.97	55.32	76.84	111.49	93.04	86.28	101.15
70	GRMZM2G024548	1	277679887	277684837	CRD_Mean;CRN_2015SY	277704588	SNP_1_277704588;SNP_1_277704589	LOC_Os07g42260.1	peptidase, T1 family, putative, expressed	0	0	0	0	0	0	0	0	0	0	0	0	0	0	0	0	0	0	0	0	0	0	0	0	0	0	0	0	0	0	0	0	0	0	0	0	0	0	0	0
71	GRMZM2G300044	1	277702641	277703646	CRD_Mean;CRN_2015SY	277704588	SNP_1_277704588;SNP_1_277704589	LOC_Os03g15220.1	DUF292 domain containing protein, expressed	0	0	0	0	0	0	0	0	0	0	0	0	0	0	0	0	0	0	0	0	0	0	0	0	0	0	0	0	0	0	0	0	0	0	0	0	0	0	0	0
72	GRMZM2G395354	1	285591150	285593822	CRA_2015SY;CRA_2015SY	285593212	SNP_1_285593212;SNP_1_285593212	LOC_Os03g57210.1	glycine-rich protein, putative, expressed	215.651	224.821	249.893	263.09	270.533	326.913	182.2	200.61	134.07	259.07	309.58	234.74	197.33	214.69	201.27	126.9	157.36	184.55	208.9	278.28	223.4	209.02	248.08	276.89	216.97	140.9	188.54	147.36	106.74	211.09	106.57	206.24	86.63	282.15	208.18	213.7	157.92	398.37	385.22	285.66
73	GRMZM5G888196	1	285598874	285600310	CRA_2015SY;CRA_2015SY	285593212	SNP_1_285593212;SNP_1_285593212	LOC_Os03g57240.1	ZOS3-19 - C2H2 zinc finger protein, expressed	17.5228	285.92	38.522	35.1317	10.5442	1.80429	180.395	20.02	24.61	16.98	30.69	23.44	4.65	15.57	16.61	11.79	11.3	6.67	16.88	36.36	13.55	16.65	26.67	10.24	12.73	54.89	274.04	425.25	97.37	409.2	432.66	632.35	241.01	219.85	304.33	612.78	940.69	327.84	221.79	103.68
74	GRMZM2G069218	1	285603499	285608445	CRA_2015SY;CRA_2015SY	285593212	SNP_1_285593212;SNP_1_285593212	LOC_Os03g57260.2	GRF zinc finger family protein, expressed	16.0961	11.5315	29.835	49.7	40.2033	32.9786	74.8883	14.99	18.5	16.15	9.49	18.8	15.46	13.71	13.89	8.61	20.06	15.68	13.52	13.7	20.43	16.47	17.39	17.23	25.65	35.13	0	8.74	40.66	0	19.11	6.41	33.45	2.2	3.68	13.14	23.14	0	4.7	5.7
75	GRMZM2G134917	1	285992073	285995271	CRN_2016SY	286038041	SNP_1_286038041	LOC_Os03g57340.1	chaperone protein dnaJ, putative, expressed	307.594	1143.2	729.731	514.428	396.298	187.87	445.462	314.87	359.58	245.02	288.73	261.54	388.46	284.28	387.26	225.45	250.84	183.62	217.34	196.45	332.05	347.28	417.37	370.23	466.32	592.24	1355.5	1233.87	635.14	1934.61	1217.11	1960.18	797.06	1396.84	874.62	678.12	500.62	820.12	732.01	2450.91
76	GRMZM2G135011	1	285998190	285999209	CRN_2016SY	286038041	SNP_1_286038041	LOC_Os03g57410.1	RING-H2 finger protein ATL5D, putative, expressed	5.08222	1.202	0.308	0.228333	0	0	0	3.41	2.73	4.88	0	6.15	0	12.63	12.45	2.75	1.3	0	11.61	6.21	6.03	5.73	8.97	6.63	0	0	0	0	0	0	0	0	0	0	0	7.19	16.85	0	0	0
77	GRMZM2G329300	1	286034596	286043648	CRN_2016SY	286038041	SNP_1_286038041	LOC_Os03g57430.1	expressed protein	51.3178	74.0805	82.54	100.655	90.1058	124.781	85.025	52.59	67.11	34.17	50.59	47.16	62.23	43.02	46.93	32.39	67.6	57.58	46.42	49.99	52.66	55.14	49.33	54.76	54.05	111.59	62.92	52.15	108.36	50.53	78.51	72.99	107.27	65.12	44.86	50.63	74.07	78.69	82.23	88.46
78	GRMZM2G028926	1	286045267	286049339	CRN_2016SY	286038041	SNP_1_286038041	LOC_Os03g57450.1	CAMK_CAMK_like.2 - CAMK includes calcium/calmodulin depedent protein kinases, expressed	104.696	20.643	12.879	12.8333	12.75	3.96286	28.905	82.52	60.75	133.2	208.71	20.56	48.87	143.61	114.29	73.95	125.64	165.31	156.61	188.52	122.26	110.41	58.75	55.01	15.55	15.13	25.86	25.38	0	34.31	4.56	20.4	0	27	18.94	20.04	6.22	23.17	27.3	19.39
79	GRMZM2G329181	1	286049789	286052959	CRN_2016SY	286038041	SNP_1_286038041	LOC_Os03g57460.1	fasciclin domain containing protein, expressed	1075.2	466.147	353.651	381.493	368.87	311.299	525.507	1522.22	1214.57	2056.07	2165.66	1791.26	1350.99	835.13	636.21	593.73	1034.16	508.87	756.21	451.24	423.06	595.77	1370.28	1152.31	895.81	771.49	476.41	568.11	395.47	213.18	622.51	220.65	315.39	221.05	1990.42	2247.94	1077.15	55.43	29.95	42.78
80	GRMZM5G834566	1	294409617	294411623	CRN_Mean	294416768	SNP_1_294416768	LOC_Os03g61249.1	RD26, putative, expressed	0	0	0	0	0	0	0	0	0	0	0	0	0	0	0	0	0	0	0	0	0	0	0	0	0	0	0	0	0	0	0	0	0	0	0	0	0	0	0	0
81	GRMZM2G474252	1	294434268	294435713	CRN_Mean	294416768	SNP_1_294416768	LOC_Os03g61249.1	RD26, putative, expressed	0	0	0	0	0	0	0	0	0	0	0	0	0	0	0	0	0	0	0	0	0	0	0	0	0	0	0	0	0	0	0	0	0	0	0	0	0	0	0	0
82	GRMZM2G137469	1	294460331	294465642	CRN_Mean	294416768	SNP_1_294416768	LOC_Os10g38030.1	per1-like family protein, putative, expressed	1.28056	1.22	1.23	1.52667	1.09667	0.657143	1.06833	0.69	1.05	0.99	1.19	1.22	1.23	0.86	1.53	0.71	1.8	0.84	0.86	1.72	1.28	1.4	2.2	2.12	1.36	2.01	1.13	0.94	0.76	2.19	1.08	1.91	0.73	0.75	0	0.71	1.3	0.43	0.77	2.14
83	GRMZM2G137518	1	294466381	294468387	CRN_Mean	294416768	SNP_1_294416768	LOC_Os03g61249.1	RD26, putative, expressed	0	0	0	0	0	0	0	0	0	0	0	0	0	0	0	0	0	0	0	0	0	0	0	0	0	0	0	0	0	0	0	0	0	0	0	0	0	0	0	0
84	GRMZM2G485603	10	4684279	4684609	CRN_2017SY;CRN_Mean	4729497	SNP_10_4729497;SNP_10_4729497			0	0	0.392	0	4.16833	19.5086	0	0	0	0	0	0	0	0	0	0	0	0	0	0	0	0	0	0	0	0	0	0	0	0	0	0	0	0	0	0	0	0	0	0
85	GRMZM2G004414	10	4685001	4690509	CRN_2017SY;CRN_Mean	4729497	SNP_10_4729497;SNP_10_4729497	LOC_Os11g05070.1	sodium/calcium exchanger protein, putative, expressed	29.1761	62.2875	64.061	78.275	85.5217	101.701	96.205	15.1	22.65	28	14.03	24.6	17.29	29.05	45.38	19.21	36.01	30.53	23.13	32.39	49.26	42.7	33.8	31.15	30.89	60.75	66.7	36.36	53.33	23.94	49.56	59.74	49.38	70.22	14.63	27.15	44.13	140.21	100.89	104.13
86	GRMZM2G004445	10	4692725	4696761	CRN_2017SY;CRN_Mean	4729497	SNP_10_4729497;SNP_10_4729497	LOC_Os11g05080.1	powdery mildew resistant protein 5, putative, expressed	17.1483	23.2815	20.177	26.435	23.18	24.8986	23.6233	14.64	14.12	15.04	3.27	36.98	12.65	14.57	17.09	8.14	14.7	17.01	14.23	9.75	34.65	25.26	21.46	17.69	17.42	22.37	25.79	29.56	25.98	60.42	31.2	29.95	27.28	5.33	8.43	11.35	36.85	20.93	9.56	11.58
87	GRMZM2G004534	10	4697235	4702142	CRN_2017SY;CRN_Mean	4729497	SNP_10_4729497;SNP_10_4729497	LOC_Os11g05110.1	pyruvate kinase, putative, expressed	561.722	913.626	498.603	597.005	433.714	210.844	526.545	585.4	825.19	429.71	511.97	559.25	675.76	476.29	479.75	329.62	819.37	469.67	573.61	531.6	636.34	584.74	538.72	532.28	551.72	680.38	1464.83	970.51	386.4	1406.08	484.21	1624.67	327.73	941.18	425.85	296.44	290.44	1418.86	1082.08	1361.76
88	AC188612.3_FG009	10	4722206	4723096	CRN_2017SY;CRN_Mean	4729497	SNP_10_4729497;SNP_10_4729497			0	0	0	0	0	0	0	0	0	0	0	0	0	0	0	0	0	0	0	0	0	0	0	0	0	0	0	0	0	0	0	0	0	0	0	0	0	0	0	0
89	GRMZM2G479967	10	4732324	4739130	CRN_2017SY;CRN_Mean	4729497	SNP_10_4729497;SNP_10_4729497	LOC_Os01g73070.2	expressed protein	0	0	0	0	0	0	0	0	0	0	0	0	0	0	0	0	0	0	0	0	0	0	0	0	0	0	0	0	0	0	0	0	0	0	0	0	0	0	0	0
90	GRMZM2G031317	10	4740034	4741046	CRN_2017SY;CRN_Mean	4729497	SNP_10_4729497;SNP_10_4729497	LOC_Os11g05190.1	phytosulfokines precursor, putative, expressed	62.8561	339.918	188.623	121.933	157.788	5.04714	238.323	33.39	1.8	43.18	34.05	57.1	13.36	89.85	116.92	44.9	3.26	56.27	77.07	227.71	181.98	79.62	32.68	20.17	18.1	118.49	126.81	215.75	41.87	100.99	423.47	40.54	231.69	362.36	84.87	102.15	218.28	140.28	225.19	373.44
91	GRMZM2G031261	10	4752399	4753182	CRN_2017SY;CRN_Mean	4729497	SNP_10_4729497;SNP_10_4729497	LOC_Os12g05260.1	phytosulfokines precursor, putative, expressed	1.735	18.038	2.855	40.68	4.98833	0	37.1067	0	0	0	0	0	0	5.25	9.62	2.48	0	0	0	11	0	0	1.11	0	1.77	24.04	6.56	32.14	0	0	86.99	0	66.1	0	0	21.64	61.89	0	0	0
92	GRMZM2G031033	10	4779364	4780100	CRN_2017SY;CRN_Mean	4729497	SNP_10_4729497;SNP_10_4729497	LOC_Os11g05170.1	expressed protein	4.01389	6.0695	12.174	0.796667	17.4433	15.1657	18.2883	0	0	0	0	0	0	0	0	0	0	0	0	0	0	0	0	0	72.25	6.42	0	0	12.27	0	59.23	0	6.92	7.06	0	0	12.73	0	0	0
93	GRMZM2G418644	10	14695948	14698281	CRA_2017SY	14724988	SNP_10_14724988	LOC_Os06g35370.1	polygalacturonase, putative, expressed	0	0.0285	0.015	1917.77	2.09917	0	0	0	0	0	0	0	0	0	0	0	0	0	0	0	0	0	0	0	0	0	0	0	0	0	0	0	0	0	0	0	0	0	0	0.47
94	GRMZM2G348992	10	14723947	14729823	CRA_2017SY	14724988	SNP_10_14724988	LOC_Os01g03510.1	WD domain, G-beta repeat domain containing protein, expressed	3.61444	0.6195	0.826	1.83667	0.289167	0.251429	0.143333	4.74	6.71	3.12	2.77	3.4	12.67	2.88	2.43	1.38	6.78	1.85	1.97	1.42	2.59	2.44	3.04	1.83	3.04	9.84	0	0	0	0	0	1	0	0	0	0	0	0	0	0
95	GRMZM2G048175	10	14731796	14734545	CRA_2017SY	14724988	SNP_10_14724988	LOC_Os12g28770.1	POEI19 - Pollen Ole e I allergen and extensin family protein precursor, expressed	439.053	113.592	58.826	82.725	91.6542	7.71286	186.545	355.11	376.46	599.95	689.69	34.06	611.01	557.75	614.2	492.53	603.49	735.05	312.36	148.3	380.23	484.87	535.19	136.62	236.08	106.62	256.59	192.69	141.26	8.73	237.11	26.69	81.27	0	461.58	524.21	235.09	0	0	0
96	GRMZM2G173669	10	14767640	14770295	CRA_2017SY	14724988	SNP_10_14724988	LOC_Os12g29220.1	nodulin MtN3 family protein, putative, expressed	384.952	1502.95	455.187	63.8317	12.3	0.504286	5.06833	195.43	29.45	316.21	24.94	1173.76	220.74	790.2	783.35	316.7	64.69	389.68	602.19	1501.07	113.28	140.97	141.63	92.1	32.75	176.87	2371.53	1028.01	65.67	1604.14	19.3	3535.82	13.49	2264.67	460.69	112.32	43.39	2713.04	2224.25	2690.37
97	GRMZM5G862959	10	15210159	15247509	CRD_2015SY	15214362	SNP_10_15214362	LOC_Os12g19350.1	expressed protein	72.8222	69.1774	111.37	89.2133	71.9175	18.2457	156.402	66.13	84.27	52.4	55.01	84.61	61.44	59.91	70.54	38.7	95.08	51.98	64.92	70.46	86.9	83.7	73.04	95.13	116.58	74.45	52.46	56.88	70.24	65.31	66.61	78.4	81.12	54.92	57.88	58.85	72.49	77.16	93.05	61.93
98	GRMZM2G402881	10	60750335	60753373	CRA_Mean	60750859	SNP_10_60750859	LOC_Os09g35680.1	OsFBX339 - F-box domain containing protein, expressed	6.315	6.4605	4.529	4.03	4.83583	3.47571	0.935	5.01	4.17	3.32	7.28	6.25	5.54	8.8	9.13	5.01	3.09	7.18	6.53	11.76	7.05	5.55	6.2	5.27	6.53	5.46	5.07	5.37	0.76	5.24	1.86	6.47	0	2.9	0	4.31	4.22	8.36	16.46	9.51
99	AC187404.3_FG006	10	60757205	60757919	CRA_Mean	60750859	SNP_10_60750859			0	0	0	0	0	0	0	0	0	0	0	0	0	0	0	0	0	0	0	0	0	0	0	0	0	0	0	0	0	0	0	0	0	0	0	0	0	0	0	0
100	GRMZM2G007140	10	60759258	60773761	CRA_Mean	60750859	SNP_10_60750859	LOC_Os03g48430.1	1-aminocyclopropane-1-carboxylate oxidase homolog 4, putative, expressed	0	18.9625	0.329	4.61	0	0.72	0	0	0	0	0	0	0	0	0	0	0	0	0	0	0	0	0	0	0	0	56.84	57.3	0	74.3	3.8	43.41	0	4.48	5.18	0	3.19	15.91	12.77	0
101	AC187404.3_FG003	10	60779904	60782241	CRA_Mean	60750859	SNP_10_60750859			0	0	0	0	0	0	0	0	0	0	0	0	0	0	0	0	0	0	0	0	0	0	0	0	0	0	0	0	0	0	0	0	0	0	0	0	0	0	0	0
102	GRMZM2G060054	10	83681541	83697115	CRD_2015SY	83708041	SNP_10_83708041	LOC_Os06g06160.1	IQ calmodulin-binding motif domain containing protein, expressed	51.6011	23.024	52.296	14.8833	12.6783	16.1729	4.16167	48.42	27.01	55.13	86.1	71.87	35.31	42.94	49.97	32.27	36.13	32.81	50.61	71.14	51.34	53.72	66.44	93.01	24.6	13.76	17.71	15.93	11.29	8.61	26.98	10.79	18.71	36.3	50.37	38.43	40.47	34.02	29.58	17.38
103	GRMZM2G103785	10	83753307	83756619	CRD_2015SY	83708041	SNP_10_83708041	LOC_Os08g04300.1	fringe-related protein, putative, expressed	10.1294	67.5695	22.67	22.8983	11.0783	0.2	4.70667	1.19	0	2.41	0	2.87	0.9	7.79	10.39	4.91	2.09	13.02	10.75	9.48	23.27	26.47	31.74	32.5	2.55	4.11	44.08	35.6	6.39	64.93	6.77	46.8	6.31	50.89	87.39	69.37	15.52	138.13	85.01	75.5
104	GRMZM2G042164	10	91493754	91515379	CRN_2015SY	91539115	SNP_10_91539115	LOC_Os04g08340.1	OsSigP3 - Putative Type I Signal Peptidase homologue; employs a putative Ser/Lys catalytic dyad, expressed	137.243	104.127	118.915	91.4	173.896	272.467	201.547	133.11	220.66	94.57	105.92	113.88	134.15	141.01	131.67	81.9	216.53	126.01	131.17	103.78	129.96	137.16	179.3	147.63	141.96	164.61	98.68	113.84	125.7	66.92	152.9	85.82	144.29	100.38	98.45	101.81	108.68	101.34	78.14	76.99
105	GRMZM2G069784	10	97913443	97915775	CRD_Mean	97930181	SNP_10_97930181	LOC_Os11g17720.1	plant protein of unknown function domain containing protein, expressed	29.8106	0.212	0	0	0	0	0.453333	35.39	76.02	13.96	35.87	1.08	15.85	35.7	48.15	21.59	76.15	20.97	56.23	27.02	22.25	28.77	8.02	9.65	3.92	4.24	0	0	0	0	0	0	0	0	0	0	0	0	0	0
106	GRMZM2G566307	10	97953334	97954011	CRD_Mean	97930181	SNP_10_97930181			0	0	0	0	0	0	0	0	0	0	0	0	0	0	0	0	0	0	0	0	0	0	0	0	0	0	0	0	0	0	0	0	0	0	0	0	0	0	0	0
107	GRMZM2G332918	10	117697548	117698680	CRA_2017SY;CRA_Mean	117747929	SNP_10_117747929;SNP_10_117747965			0.0283333	0	0.038	0	0	0	0	0	0	0	0	0	0	0	0	0	0	0	0	0	0	0	0.51	0	0	0	0	0	0	0	0	0	0	0	0	0	0	0	0	0
108	GRMZM2G033339	10	117730915	117731778	CRA_2017SY;CRA_Mean	117747929	SNP_10_117747929;SNP_10_117747965	LOC_Os03g22790.1	beta-amylase, putative, expressed	0	0	0	0	0	0	0	0	0	0	0	0	0	0	0	0	0	0	0	0	0	0	0	0	0	0	0	0	0	0	0	0	0	0	0	0	0	0	0	0
109	GRMZM2G443776	10	117774431	117777712	CRA_2017SY;CRA_Mean	117747929	SNP_10_117747929;SNP_10_117747965	LOC_Os04g35650.1	pentatricopeptide, putative, expressed	4.27778	0.331	1.719	1.46167	1.73167	0.557143	2.12833	3.23	2.68	4.38	9.4	2.5	1.85	4.61	8.2	4.87	1.9	8.6	3.4	1.9	3.34	4.89	7.73	3.18	0.34	2.3	0	0	0.59	0	0.75	0	0.52	0	0	0	0	0	0	0
110	GRMZM2G443762	10	117777931	117779249	CRA_2017SY;CRA_Mean	117747929	SNP_10_117747929;SNP_10_117747965	LOC_Os04g35580.1	expressed protein	2.20278	0.7975	0	0	0.993333	0	2.37333	5.77	0	2.69	4.03	0	0	2.07	2.8	3.81	1.45	0	0	0	0	3.1	10.6	3.33	0	0	0	0	0	0	11.95	0	4	0	0	0	0	0	0	0
111	GRMZM2G010323	10	117919166	117923694	CRN_2015SY	117946210	SNP_10_117946210	LOC_Os04g35800.1	zinc finger C-x8-C-x5-C-x3-H type family protein, expressed	148.625	117.952	135.9	141.952	120.76	146.643	159.587	159.46	187.75	147.49	163.96	200.62	122.27	146.36	153.15	107.61	163.37	132.54	137.78	142.05	128.26	152.57	160.69	149.59	119.73	168.53	97.57	109.26	160.69	86.47	122.02	174.19	156.56	119.76	105.85	120.7	133.09	97.01	91.21	127.9
112	GRMZM2G316925	10	117942435	117943104	CRN_2015SY	117946210	SNP_10_117946210	LOC_Os12g01400.1	OsCML26 - Calmodulin-related calcium sensor protein, expressed	1.14056	0	0	0	0	0	1.41	0	0	5.45	0	0	0	0	1.87	0	1.15	0	3.69	2.73	0	1.49	2.52	1.63	0	0	0	0	0	0	0	0	0	0	0	0	0	0	0	0
113	GRMZM2G097499	10	120666029	120673450	CRA_2016SY	120671481	SNP_10_120671481	LOC_Os04g37540.1	expressed protein	24.9106	67.856	35.693	47.0267	52.5008	68.48	46.12	24.15	27.4	22.94	27.94	23.97	22.91	26.94	29.36	16.82	22.56	23.56	23.84	28.1	26.77	23.25	23.96	25.42	28.5	35.91	85.83	68.51	39.06	82.7	37.66	125.18	49.01	69.03	38.01	34.24	38.59	93.13	68.91	113.17
114	GRMZM2G097504	10	120674959	120678223	CRA_2016SY	120671481	SNP_10_120671481	LOC_Os12g02094.1	saposin-like type B, region 1 family protein, putative, expressed	106.689	97.4425	101.085	52.7767	49.045	13.0914	33.68	77.48	15.76	120.03	150.79	99.4	49.69	139.38	165.94	84.85	28.19	135.92	133.88	203.14	120.27	114.79	114	114.91	51.98	24.62	82.88	59.19	17.62	73.92	18.05	89.9	16.11	94.81	107.78	72.79	32.65	112.55	95.87	145.63
115	GRMZM2G381169	10	120686445	120688606	CRA_2016SY	120671481	SNP_10_120671481	LOC_Os03g51610.1	Inositol 1, 3, 4-trisphosphate 5/6-kinase, putative, expressed	0.37	0	0.564	0.291667	0.0883333	0	0	0	0	0	0	0	0	0	2.59	0	1.02	0	0	0	0	0	2.19	0.86	0	0	0	0	0	0	0	0	0	0	0	0	0	0	0	0
116	GRMZM2G079490	10	120691471	120693146	CRA_2016SY	120671481	SNP_10_120671481	LOC_Os04g37550.1	aspartic proteinase nepenthesin-2 precursor, putative, expressed	176.764	71.729	45.257	16.7983	7.7725	0	1.36	189.75	6.55	355.32	187.45	150.16	48.15	392.18	487.02	246.9	7.14	81.91	158.81	299.81	71.55	78.37	155.79	230.72	34.17	8.4	51.46	68.53	0	5.2	19.07	3.1	0	30.95	385.03	475.24	324.32	7.68	12.26	0
117	GRMZM2G007120	10	120693426	120697173	CRA_2016SY	120671481	SNP_10_120671481	LOC_Os04g37580.1	cation transport regulator-like protein 1, putative, expressed	149.468	165.999	104.968	64.0567	80.14	111.133	29.5233	149.34	172.77	166.43	216.42	123.07	136.48	167.32	174.13	111.46	150.39	126.01	134.33	182.29	118.08	140.58	144.32	143.22	133.78	93.47	231.63	187.33	56.77	293.85	44.75	343.4	44.26	236.31	88.49	86.7	49.22	148.75	147.38	239.23
118	GRMZM2G453978	10	121225868	121226480	CRD_2016SY	121242877	10:121242877	LOC_Os04g37700.1	expressed protein	0	0	0	0	0	0	0	0	0	0	0	0	0	0	0	0	0	0	0	0	0	0	0	0	0	0	0	0	0	0	0	0	0	0	0	0	0	0	0	0
119	GRMZM2G453963	10	121229512	121231099	CRD_2016SY	121242877	10:121242877			0	0	0	0	0	0	0	0	0	0	0	0	0	0	0	0	0	0	0	0	0	0	0	0	0	0	0	0	0	0	0	0	0	0	0	0	0	0	0	0
120	GRMZM2G158469	10	121242593	121244485	CRD_2016SY	121242877	10:121242877	LOC_Os06g10990.1	DnaK family protein, putative, expressed	0.0783333	0.067	0	0	0	0	0	0	0	0	0	0	1.41	0	0	0	0	0	0	0	0	0	0	0	0	1.34	0	0	0	0	0	0	0	0	0	0	0	0	0	0
121	GRMZM2G344256	10	121274480	121276112	CRD_2016SY	121242877	10:121242877	LOC_Os06g10990.1	DnaK family protein, putative, expressed	0	0	0	0	0	0	0	0	0	0	0	0	0	0	0	0	0	0	0	0	0	0	0	0	0	0	0	0	0	0	0	0	0	0	0	0	0	0	0	0
122	GRMZM2G066815	10	125449560	125453832	CRD_2016SY	125502748	SNP_10_125502748	LOC_Os04g40400.1	eukaryotic translation initiation factor 4B, putative, expressed	106.363	93.4045	93.804	104.345	169.768	323.941	132.547	118.12	185.16	98.8	84.52	119	114.51	96.94	95.3	59.99	144.72	81.48	91.74	67.35	101.2	102.54	118.78	118.77	115.61	141.64	87.11	108.48	122.88	99.14	142.97	90.98	137.49	62.86	65.7	75.35	88.06	84	71.39	100.37
123	GRMZM5G827485	10	130935292	130938207	CRD_Mean	130986907	10:130986907	LOC_Os06g30940.1	pentatricopeptide, putative, expressed	4.03222	4.321	6.294	6.62	5.28583	7.42143	8.47833	4.43	6.96	2.8	2.6	5.75	5.01	3.41	4.06	3.35	6.12	5.3	3.88	2.05	2.24	2.43	3.6	3.73	4.86	9.18	4.3	3.73	8.03	7.51	3.8	3.62	6.67	2.12	1.45	0	3.77	3.85	2.98	1.3
124	GRMZM2G306643	10	130982296	130983119	CRD_Mean	130986907	10:130986907	LOC_Os04g43990.1	DUF584 domain containing protein, putative, expressed	0.303333	0	0	5.61167	96.3717	376.447	9.29667	0	0	0	0	0	0	0	0	0	5.46	0	0	0	0	0	0	0	0	0	0	0	0	0	0	0	0	0	0	0	0	0	0	0
125	GRMZM2G005284	10	130985138	130987563	CRD_Mean	130986907	SNP_10_130986907	LOC_Os02g41800.1	auxin response factor, putative, expressed	0.633333	0.5335	0	3.895	1.79917	0	0	0.91	0	1.84	0.65	0	1.62	0	0.41	0.95	4.38	0	0	0	0	0	0.39	0.25	0	0	0	0	0	0	0	0	0	0	0	0	0	0	0	0
126	GRMZM2G086136	10	144602472	144604964	CRN_2016SY	144613372	10:144613372	LOC_Os04g55200.1	coatomer subunit epsilon, putative, expressed	4.08778	2.2515	3.246	161.582	11.5733	0	227.105	7.93	17.15	0	4.99	0	8.93	2.1	3.3	2.38	10.07	0	3.47	0	0	0	4.02	0.38	8.86	2.45	0	0	0	0	18.13	0	18.23	0	0	0	6.22	0	0	0
127	GRMZM2G086030	10	144610790	144625026	CRN_2016SY	144613372	10:144613372	LOC_Os04g55230.1	tetratricopeptide repeat domain containing protein, putative, expressed	31.4222	316.67	147.33	118.2	363.343	899.23	130.872	28.93	54.54	17.32	21.94	12.58	41.36	26.24	27.14	23.47	28.73	43.91	18.68	23.36	20.51	18.73	17.21	31.53	109.42	94.05	660.03	530.91	76.17	506.51	269.58	591.59	111.05	205.86	224.64	214.28	151.84	355.27	276.97	385.85
128	GRMZM2G064903	10	144626911	144627887	CRN_2016SY	144613372	10:144613372	LOC_Os04g55240.1	VQ domain containing protein, putative, expressed	0.846667	0.3025	1.639	2.9	0	0	0.481667	0	0	0	0	0	0	2.23	4.25	2.19	0	0	0	5.1	0	0	0	1.47	0	3.39	0	0	0	0	0	0	2.66	0	0	0	0	0	0	0
129	GRMZM2G064831	10	144630450	144635115	CRN_2016SY	144613372	10:144613372	LOC_Os04g55260.1	thiamine-repressible mitochondrial transport protein THI74, putative, expressed	10.3594	17.815	9.715	74.6583	9.455	0.251429	12.3783	14.48	12.1	12.3	29.11	16.63	11.72	7.03	5.25	4.85	5.25	5.31	5.29	7.84	3.07	4.12	16.62	14.02	11.48	3.18	11.18	6.75	10.41	38.4	3.71	62.24	5.2	22.72	13.45	9.73	12.07	20.18	16.75	20.04
130	AC204437.3_FG004	10	144630461	144631174	CRN_2016SY	144613372	10:144613372	LOC_Os04g55250.1	expressed protein	0.203889	0.228	0	0	0	0	0	0	0	0	0	0	0	0	2.11	0	0	0	0	0	0	1.42	0	0.14	0	0	0	0	0	0	0	0	0	0	0	0	4.56	0	0	0
131	GRMZM2G178062	10	149524872	149526239	CRN_Mean	149527612	SNP_10_149527612	LOC_Os04g20420.1	DNA binding protein, putative, expressed	0.0477778	0	0	16.1333	0	0	0	0	0	0	0	0	0	0	0	0	0	0	0	0	0	0	0	0	0.86	0	0	0	0	0	0	0	0	0	0	0	0	0	0	0
132	GRMZM2G178025	10	149528587	149531493	CRN_Mean	149527612	SNP_10_149527612	LOC_Os04g41970.1	endoglucanase, putative, expressed	499.362	75.7125	75.865	62.49	114.489	5.06714	65.7633	991.16	698.49	941.29	1859.33	437.5	672.32	383.38	242.15	276.31	551.24	225.43	255.16	206.56	158.51	188.74	323.14	271.14	306.67	305.07	94.87	114.78	48.72	54.12	101.22	23.09	45.05	26.75	294.19	232.8	138.64	3.65	4.9	3.32
133	GRMZM2G342815	2	10311252	10314048	CRD_2016SY	10352145	2:10352145	LOC_Os01g71420.1	Ser/Thr protein phosphatase family protein, putative, expressed	0.113889	0.0285	0	0	0	0	0	0	0	0	0	0	2.05	0	0	0	0	0	0	0	0	0	0	0	0	0.57	0	0	0	0	0	0	0	0	0	0	0	0	0	0
134	GRMZM2G005310	2	10343925	10353440	CRD_2016SY	10352145	2:10352145	LOC_Os03g12570.1	expressed protein	76.5056	50.7085	117.003	193.368	124.37	163.069	259.422	81.04	174.74	50.81	26.98	50.64	127.11	77.47	62.09	57.59	150.62	119.18	80.52	14.59	43.89	52.35	80.71	56.26	70.51	258.99	8.37	20.96	255.07	5.4	81.09	5.71	251.78	4.99	4.16	4.89	33.41	6.39	7.17	7.93
135	AC190685.3_FG005	2	10355344	10356222	CRD_2016SY	10352145	2:10352145			0	0	0	0	0	0	0	0	0	0	0	0	0	0	0	0	0	0	0	0	0	0	0	0	0	0	0	0	0	0	0	0	0	0	0	0	0	0	0	0
136	GRMZM2G005155	2	10371800	10374751	CRD_2016SY	10352145	SNP_2_10352145	LOC_Os04g52410.2	OsMADS31 - MADS-box family gene with MIKCc type-box, expressed	30.4533	42.231	18.05	61.1133	104.187	18.0229	9.04667	46.14	24.09	47.64	55.94	86.6	22.64	27.33	21.63	12.58	23.66	15.12	25.19	32.84	20.91	18.25	23.65	21.28	22.67	10.13	30.64	23.98	16.65	32.01	31.81	43.99	45.39	38.53	16.73	32.46	36.02	56.8	67.63	37.53
137	GRMZM2G005107	2	10375614	10379329	CRD_2016SY	10352145	2:10352145	LOC_Os04g52400.1	oxidoreductase, short chain dehydrogenase/reductase family protein, putative, expressed	113.53	114.392	100.384	91.2633	72.875	81.84	59.3433	112.87	124.41	114.5	117.23	109.83	76.87	131.62	140.25	79.97	124.07	94.96	125.26	161.45	119.23	123.53	99.62	111.94	75.93	57.32	91.2	62.77	59.19	102.3	66.13	122.58	82.55	112.45	87.21	97.86	89.66	151.18	193.88	130.71
138	GRMZM2G005040	2	10384673	10389573	CRD_2016SY	10352145	SNP_2_10352145	LOC_Os04g52390.1	potassium transporter, putative, expressed	17.2467	25.8155	2.202	13.065	6.24333	0	44.4983	28.16	55.1	4.91	12.15	5.32	16.75	16.81	10.32	9.66	54.61	5.52	15.19	8.11	4.03	5.37	13.39	26.32	18.72	7.01	11.92	1.8	2.18	1.86	10.28	18.19	13.7	46.22	9.27	5.73	17.91	68.55	93.71	30.33
139	GRMZM2G306374	2	10391226	10395283	CRD_2016SY	10352145	2:10352145	LOC_Os08g10570.2	bifunctional purine biosynthesis protein purH, putative, expressed	197.263	189.07	233.164	177.025	340.312	597.083	377.593	215.26	266.65	207.09	186.46	232.8	242.58	179.59	177.81	119.14	252.67	190.37	150.11	121.78	183.21	183.37	232.72	199.25	209.88	293.25	186.83	128.48	214.55	211.43	121.74	206.12	159.97	148.54	126.1	123.76	77.45	228.23	240.1	194.51
140	AC215994.3_FG003	2	10396315	10400047	CRD_2016SY	10352145	2:10352145	LOC_Os08g38850.1	phosphatidylinositol transfer, putative, expressed	0.0761111	0.04	0.024	0.0683333	0.0558333	0	0	0	0	0	0	0	0	0	0.22	0	0.26	0	0	0	0	0	0.64	0.25	0	0.8	0	0	0	0	0	0	0	0	0	0	0	0	0	0
141	GRMZM2G052142	2	34393536	34432082	CRN_2015SY	34477361	SNP_2_34477361	LOC_Os04g41510.1	serine/threonine-protein kinase GCN2, putative, expressed	28.15	38.304	44.482	25.29	85.3275	187.656	24.37	20.85	29.06	16.49	27.55	19.62	22.57	27.42	30.01	19.31	34.54	26.24	25.52	37.29	37.52	36.49	18.15	34.46	43.61	26.57	43.87	43.69	21.34	67.47	27.94	47	23.26	33.4	16.32	22.67	29.77	45.98	48.56	44.34
142	GRMZM2G057113	2	34463359	34469029	CRN_2015SY	34477361	SNP_2_34477361	LOC_Os04g41500.1	expressed protein	81.9689	65.755	59.743	36.7767	35.23	28.14	40.1967	63.69	59.44	104.92	129.88	64.93	96.44	85.72	72.66	42.82	63.58	107.26	112.15	159.39	72.35	64.66	54.95	63.6	57	84.29	47.37	40.88	45.67	46.02	34.29	40.46	30.22	69.69	40.07	26.78	25.12	86.37	88.23	67.89
143	GRMZM2G021459	2	46396610	46397368	CRD_Mean	46440488	SNP_2_46440488	LOC_Os04g36820.1	expressed protein	21.9272	8.284	11.397	42.6817	24.0742	80.4	0.793333	11.84	30.49	14.59	18.51	64.54	50.41	14.94	5.58	13.25	43.09	0	13.24	9	5.87	6.67	32.31	2.32	58.04	55.78	0	0	16.8	0	39.95	0	15.82	0	0	10.05	27.28	0	0	0
144	GRMZM2G021464	2	46399656	46407712	CRD_Mean	46440488	SNP_2_46440488			78.4339	70.3965	72.422	84.7017	77.5692	94.3829	117.232	76.93	143.59	62.41	56.93	69.64	77.86	66.96	74.69	42.87	130.4	75.29	73.62	57.47	65.82	73.2	92.15	81.45	90.53	123.78	56.07	74.36	117.63	55.13	105.84	72.54	65.17	42.45	45.5	52.92	89.94	81.43	45.1	86.3
145	GRMZM2G021831	2	46408460	46410063	CRD_Mean	46440488	SNP_2_46440488	LOC_Os04g36790.1	transcription factor like protein, putative, expressed	6.65056	5.1015	5.344	9.69333	5.2925	3.87714	5.325	9.45	3.22	5.88	6.64	5.58	1.79	9.13	10.44	2.54	7.97	7.55	5.93	8.73	5.14	4.44	8.47	6.31	10.5	10.23	0	0	7.98	0	3.53	0	2.69	3.71	7.39	8.81	10.05	18.62	18.33	0
146	GRMZM2G113513	2	56820590	56823200	CRD_Mean	56868748	2:56868748	LOC_Os04g33810.1	RNA recognition motif containing protein, putative, expressed	76.0122	57.7265	170.258	124.355	156.338	169.703	220.243	67.31	160.41	59.39	31.08	66.31	89.09	70.88	64.46	44.89	140.78	73.06	72.45	32.76	58.84	60.46	91.62	81.24	103.19	142.6	28.48	23.9	106.75	32.57	68.51	38.63	106.75	9.06	34.17	21.86	45.82	45.6	60.11	39.5
147	GRMZM2G113646	2	56863164	56864249	CRD_Mean	56868748	2:56868748	LOC_Os04g33820.1	OsFBX132 - F-box domain containing protein, expressed	0	0	0	0	0	0	0	0	0	0	0	0	0	0	0	0	0	0	0	0	0	0	0	0	0	0	0	0	0	0	0	0	0	0	0	0	0	0	0	0
148	GRMZM2G414140	2	56865819	56870650	CRD_Mean	56868748	2:56868748	LOC_Os03g57340.1	chaperone protein dnaJ, putative, expressed	0	0.071	0	0	0	0	0	0	0	0	0	0	0	0	0	0	0	0	0	0	0	0	0	0	0	1.42	0	0	0	0	0	0	0	0	0	0	0	0	0	0
149	GRMZM2G066208	2	125052013	125053733	CRD_2015SY	125005517	SNP_2_125005517	LOC_Os05g41640.3	phosphoglycerate kinase protein, putative, expressed	0	0	0	0	0	0	0	0	0	0	0	0	0	0	0	0	0	0	0	0	0	0	0	0	0	0	0	0	0	0	0	0	0	0	0	0	0	0	0	0
150	GRMZM2G473891	2	134990756	134992797	CRD_2015SY	135015891	SNP_2_135015891	LOC_Os01g06470.1	expressed protein	0.177778	0.232	0	0	0	0	0	0	0	0	0	0	3.2	0	0	0	0	0	0	0	0	0	0	0	0	4.64	0	0	0	0	0	0	0	0	0	0	0	0	0	0
151	GRMZM2G473915	2	134994824	134998667	CRD_2015SY	135015891	SNP_2_135015891	LOC_Os04g40040.1	copper methylamine oxidase precursor, putative, expressed	0	0	0	0	0	0	0	0	0	0	0	0	0	0	0	0	0	0	0	0	0	0	0	0	0	0	0	0	0	0	0	0	0	0	0	0	0	0	0	0
152	GRMZM2G057910	2	156813058	156828691	CRA_2016SY	156810787	SNP_2_156810787	LOC_Os09g10820.1	oxidoreductase domain protein, putative, expressed	119.546	59.2465	63.224	86.8117	74.2175	29.3929	64.49	130.69	214.49	100.97	121.85	102.47	135.24	139.55	128.81	94.48	193.31	99.95	145.58	109.94	77.32	91.18	110.32	89.06	66.61	121.21	34.5	44.59	59.89	19.54	108.03	15.72	126.76	45.53	50.6	66.13	119.12	31.33	39.92	35.22
153	GRMZM2G049588	2	157573719	157594556	CRA_Mean	157581455	SNP_2_157581455	LOC_Os07g07260.1	glutamine-dependent NAD, putative, expressed	101.672	107.719	92.509	93.9067	135.312	216.866	168.88	106.64	139.71	87.7	135.41	95.04	124.64	90.68	80.94	60.22	147.28	93.53	91.01	93.26	95.87	103.06	81.66	81.57	121.88	127.57	163.76	104.16	70.3	123.15	81.75	149.27	59.44	83.97	92.51	100.09	65.87	115.81	121.32	118.09
154	GRMZM2G365035	2	157924513	157932377	CRN_Mean	157965931	SNP_2_157965931	LOC_Os07g22710.1	CAMK_CAMK_like.32 - CAMK includes calcium/calmodulin depedent protein kinases, expressed	254.437	82.8665	109.617	112.392	74.0175	63.8671	66.4933	236.07	178.58	337.71	451.27	220.94	259.59	292.89	261.02	176.96	201.85	275.4	287.32	384.93	239.85	240.21	212.81	186.49	135.98	157.71	77.99	72.07	82.5	67.33	78.26	68.62	97.03	95.39	75.22	67.57	78.14	82.22	51.1	78.45
155	GRMZM2G180876	2	157937963	157939498	CRN_Mean	157965931	SNP_2_157965931	LOC_Os03g13590.1	potyvirus VPg interacting protein, putative, expressed	2.93778	1.8645	2.611	3.765	3.08417	0.37	3.25667	1.8	3.34	1.49	2.99	0.53	9.85	3.01	3.55	2.29	3.08	2.74	3.58	4.86	3.48	2.84	1.95	0.54	0.96	17.68	0	0	4.32	0	1.3	0	4.17	1.08	0	0	2.58	0	0	0
156	GRMZM5G893125	2	157959552	157965631	CRN_Mean	157965931	SNP_2_157965931	LOC_Os12g32310.1	expressed protein	0	0	0	0	0	0	0	0	0	0	0	0	0	0	0	0	0	0	0	0	0	0	0	0	0	0	0	0	0	0	0	0	0	0	0	0	0	0	0	0
157	AC190807.2_FG001	2	163731397	163732226	CRN_Mean	163742965	SNP_2_163742965	LOC_Os11g06630.1	ribosome inactivating protein, putative, expressed	0	0	0	0	0	0	0	0	0	0	0	0	0	0	0	0	0	0	0	0	0	0	0	0	0	0	0	0	0	0	0	0	0	0	0	0	0	0	0	0
158	GRMZM2G310820	2	163748806	163749423	CRN_Mean	163742965	SNP_2_163742965	LOC_Os11g06490.1	ribosome inactivating protein, putative, expressed	0	0	0	0	0	0	0	0	0	0	0	0	0	0	0	0	0	0	0	0	0	0	0	0	0	0	0	0	0	0	0	0	0	0	0	0	0	0	0	0
159	GRMZM2G082580	2	171408315	171412367	CRN_2017SY	171454323	SNP_2_171454323	LOC_Os07g14850.1	CESA6 - cellulose synthase, expressed	350.432	90.055	104.846	225.6	216.233	187.96	249.548	510.18	613.88	303.78	811.08	631.56	546.74	219.28	183.98	173.94	634.86	158.74	309.51	177.19	144.17	189.31	169.97	206.98	322.62	461.53	62.06	111.66	185.01	27.28	271.85	21.09	173.29	7.45	136.44	135.01	200.51	0	0	0
160	GRMZM2G366919	2	171488842	171494594	CRN_2017SY	171454323	SNP_2_171454323	LOC_Os07g15460.1	metal transporter Nramp6, putative, expressed	1.53833	1.382	2.726	5.985	2.87333	2.96857	3.48167	1.27	0	1.6	1.75	2.52	0.66	2.79	2.92	0	1.42	0.75	2.14	3.6	2.65	1.79	0.88	0.55	0.4	1.98	0	0	0	0	0.82	0	1.58	0	0	0	0	0	0	0
161	GRMZM2G067756	2	171494733	171498443	CRN_2017SY	171454323	SNP_2_171454323	LOC_Os07g15600.1	H-BTB6 - Bric-a-Brac, Tramtrack, Broad Complex BTB domain with H family conserved sequence, expressed	22.0322	27.835	33.35	50.2133	46.9525	37.2914	54.0517	20.2	30.96	15.56	13.23	15.67	21.45	18.7	23.54	16.78	34.69	21.87	20.01	10.92	25.95	25.51	24.16	26.59	30.79	46.21	13.5	18.96	44	9.76	61.85	13.48	62.72	18.26	8.92	21.64	68.29	22.18	27	22.68
162	GRMZM2G367008	2	171502533	171504841	CRN_2017SY	171454323	SNP_2_171454323	LOC_Os07g15640.1	CRR4, putative, expressed	1.51	0.9885	2.316	3.28333	2.90667	2.43857	3.35833	2.86	3.5	0.74	1.76	2.72	1.16	1.22	0.82	0.49	2.48	2.17	1.22	0.64	1.63	1.17	0.6	0.96	1.04	3.38	0	0	2.28	0	1.04	0	3.26	0	0	0	0	0	0	0
163	GRMZM2G051955	2	181822882	181824556	CRD_2016SY	181822107	SNP_2_181822107	LOC_Os09g24820.1	ZF-HD protein dimerisation region containing protein, expressed	0.0583333	16.106	11.297	29.3917	8.11583	0.212857	29.2983	0	0	0	0	0	0	0	0	0	0	0	0	0	0	0	1.05	0	0	26	35.61	27.87	29.71	19.69	16.25	23.01	33.67	4.69	12.24	24.19	33.59	0	10.75	0
164	GRMZM2G005486	2	185760114	185762305	CRD_Mean;CRD_2017SY;CRD_Mean	185802997	SNP_2_185802997;SNP_2_185802997;SNP_2_185802997	LOC_Os09g28120.1	OsFBX330 - F-box domain containing protein, expressed	21.5806	16.724	30.334	36.8433	22.835	8.20571	53.535	26.67	47.01	14.39	6.8	16.78	39.22	19.6	16.39	15	47.32	23.4	22.7	6.78	13.59	13.05	18.56	15.02	26.17	76.5	8.63	12.33	40.99	5.43	35.61	4.62	66.66	2.27	13.07	11.5	21.15	0	2.03	0
165	GRMZM2G162177	2	185819812	185827002	CRD_Mean;CRD_2017SY;CRD_Mean	185802997	SNP_2_185802997;SNP_2_185802997;SNP_2_185802997	LOC_Os09g28110.1	hydroxyproline-rich glycoprotein family protein, putative, expressed	24.2772	19.9465	20.237	33.6483	36.6908	39.1757	22.0367	26.2	28.84	25.76	24.34	35.01	28.7	21.9	22.92	14.7	21.32	18.72	24.32	26.8	24.44	26.32	20.61	22.68	23.41	26.72	12.4	14.24	21.48	12.78	19.33	10.46	17.4	16.7	14.99	17.36	21.4	17.23	25.06	19.65
166	GRMZM2G162246	2	185829276	185829521	CRD_Mean;CRD_2017SY;CRD_Mean	185802997	SNP_2_185802997;SNP_2_185802997;SNP_2_185802997			0	0	0	0	0	0	0	0	0	0	0	0	0	0	0	0	0	0	0	0	0	0	0	0	0	0	0	0	0	0	0	0	0	0	0	0	0	0	0	0
167	GRMZM2G134508	2	186019485	186026076	CRD_2016SY	186022075	SNP_2_186022075	LOC_Os09g28019.1	nucleoporin p58/p45, putative, expressed	39.5522	28.0635	52.126	77.68	68.6325	87.2643	102.038	44.07	74.73	28.71	20.77	37.23	43.08	31.73	35.24	24.39	66.48	36.22	35.15	18.87	40.58	38.54	43.98	36.21	55.96	84.26	10.63	14.15	88.11	8.12	52.54	11.43	82.4	19.29	9.9	24.2	43.35	13.03	9.3	16.01
168	GRMZM2G134502	2	186026631	186029234	CRD_2016SY	186022075	SNP_2_186022075	LOC_Os09g27990.1	annexin, putative, expressed	6.67833	6.0565	10.654	7.565	7.82167	12.3014	3.72333	3.26	1.94	4.37	0.87	13.75	5.06	3.11	4.73	1.98	2.43	5.51	3.42	5.18	21.4	19.12	12.41	7.12	4.55	7.21	6.08	7.04	7.15	4.92	3.93	4.89	3.17	13.41	9.87	6.82	0.79	11.16	5.64	2.34
169	GRMZM2G134497	2	186027847	186030833	CRD_2016SY	186022075	SNP_2_186022075	LOC_Os09g27980.1	emp24/gp25L/p24 family protein, putative, expressed	4.18667	4.0225	5.686	19.8283	20.5617	27.1086	12.2133	4.22	6.61	8.43	2.76	6.36	2.5	3.05	4.16	2.98	5.67	2.79	3.55	2.71	4.79	2.55	3.12	4.85	4.26	1.9	1.84	2.23	5.5	2.58	2.64	2.13	3.13	0.03	0	3.4	1.23	2.93	3.31	3.88
170	GRMZM2G134430	2	186030225	186036888	CRD_2016SY	186022075	SNP_2_186022075	LOC_Os09g27960.1	transmembrane protein 50A, putative, expressed	313.213	209.39	185.413	215.325	318.917	488.734	206.647	308.27	279.13	359.35	352.76	421.45	281.93	363.07	351.81	228.31	236.9	299.48	316.81	314.93	292.16	283.9	370.56	347.14	229.87	211.68	233.72	232.51	158.67	246.89	244.62	207.53	176.81	184.84	196.22	236.65	292.38	193.43	227.48	189.89
171	GRMZM2G134351	2	186047484	186049045	CRD_2016SY	186022075	SNP_2_186022075	LOC_Os09g27940.1	aspartic proteinase nepenthesin-1 precursor, putative, expressed	8.285	5.0425	7.304	87.5517	1.24083	0	0	9.89	0	20.41	0	53.84	9.21	12.25	6.75	8.15	0	9.97	2.03	2.87	2.55	2.25	5.68	3.28	0	4.84	9.6	2.44	12.28	0	19.57	0	4.8	4.38	2.89	0	36.72	0	3.33	0
172	GRMZM2G002053	2	186779103	186779507	CRD_Mean	186828039	2:186828039	LOC_Os04g52880.1	expressed protein	0	0	0	0	0	0	0	0	0	0	0	0	0	0	0	0	0	0	0	0	0	0	0	0	0	0	0	0	0	0	0	0	0	0	0	0	0	0	0	0
173	GRMZM2G002075	2	186805631	186808459	CRD_Mean	186828039	2:186828039	LOC_Os09g28310.1	bZIP transcription factor, putative, expressed	50.8961	65.143	61.584	54.0567	39.3433	6.71429	41.2233	31.17	17.04	37.95	25.43	34.92	15.77	65.72	77.73	35.47	21.37	43.97	55.64	100.39	89.38	74.09	61.4	103.29	25.4	19.89	46.14	36.85	13.03	74.74	11.84	98.84	23.59	93.5	42.67	44.32	25.9	101.37	99.44	101.01
174	GRMZM2G002104	2	186821214	186822710	CRD_Mean	186828039	2:186828039	LOC_Os09g28340.1	expressed protein	14.7467	13.4935	35.956	2.20833	0	0.195714	0	29.78	52.94	6.84	25.44	4.2	15.57	13.96	12.21	11.15	40.53	0	12.07	10.94	0	3.57	11.17	15.07	0	12.49	0	0	0	0	8.16	3.6	8.36	8.74	0	2.85	24.23	60.8	52.08	0
175	GRMZM2G002131	2	186829423	186833487	CRD_Mean	186828039	2:186828039	LOC_Os09g28354.1	CPuORF39 - conserved peptide uORF-containing transcript, expressed	68.7839	46.917	143.31	17.6517	77.9167	122.427	32.135	31.96	3.51	56.63	58.6	34.05	26.57	75.38	107.2	44.68	6.61	30.13	59.33	205.51	105.71	94.78	73.91	152.79	70.76	21.84	16.89	26.8	0	37.9	1.35	12.57	0	78.69	74.79	67.91	11.38	69.05	78.77	53.98
176	GRMZM2G002142	2	186842961	186845670	CRD_Mean	186828039	2:186828039	LOC_Os09g28390.1	cytochrome P450, putative, expressed	0.153333	30.0865	1.789	2.06667	1.44333	0	0.823333	0	0	0	0	0	0	0	0.27	0	0	0	0	0	0	0	0	0	2.49	0.6	32.73	20.68	0	47.19	2.53	97.96	0	42.24	10.25	9.37	1.74	47.14	25.99	69.69
177	GRMZM2G173186	2	200309247	200335877	CRN_2016SY	200348114	SNP_2_200348114	LOC_Os07g30240.1	mutS family domain IV containing protein, expressed	10.7033	14.0475	15.854	17.215	16.8583	12.8957	21.305	5.76	0	6.64	15.22	10.24	0.72	10.72	13.06	8.79	5	10.83	12.9	30.73	17.94	14.59	6.88	14.54	8.1	3.64	10.68	15.86	9.41	9.63	5.89	16.4	6.15	3.58	11.16	6.25	5.43	4.81	14.37	8.99
178	AC190788.2_FG005	2	200347225	200348734	CRN_2016SY	200348114	SNP_2_200348114	LOC_Os07g30240.1	mutS family domain IV containing protein, expressed	6.75944	8.5405	10.526	13.01	10.7808	4.53857	8.99167	2.23	0	2.6	13.96	2.59	0	5.93	8.58	3.15	1.09	5.27	11.35	17.46	10.94	11.77	7.27	11.16	6.32	3.22	0	9.04	2.67	0	4.72	8.95	3.19	0	0	0	0	15.84	0	0
179	AC190788.2_FG004	2	200349629	200350132	CRN_2016SY	200348114	SNP_2_200348114			0.192778	0	0.498	0	0	0	0	0	0	0	0	0	0	0	0	0	0	0	0	3.47	0	0	0	0	0	0	0	0	0	0	0	0	0	0	0	0	0	0	0	0
180	GRMZM2G173162	2	200358017	200360580	CRN_2016SY	200348114	SNP_2_200348114	LOC_Os07g30240.1	mutS family domain IV containing protein, expressed	2.705	4.2765	4.928	4.67333	4.6825	3.57429	4.48833	1.16	0	1.8	3.08	1.87	0.94	2.08	1.82	0.61	0.41	2.23	4.03	7.17	6.13	5.68	3.72	4.23	1.73	1.19	0	5.05	1.14	1.52	1.08	3.67	0.64	0	0	3.1	0	3.81	3.06	3.6
181	GRMZM2G151826	2	204892526	204894031	CRN_2016SY	204902383	SNP_2_204902383	LOC_Os07g36130.1	core histone H2A/H2B/H3/H4, putative, expressed	699.094	538.166	629.384	825.673	575.511	580.599	1749.77	815.45	1679.27	493.75	309.9	399.44	976.94	693.91	636.89	494.11	1391.67	767.39	779.27	218.06	442.2	529.65	981.98	466.51	507.31	1609.73	509.29	613.7	1415.67	207.99	1089.63	423.23	1658.22	191.67	312.15	305.24	546.93	114.85	201.47	166.78
182	GRMZM2G151726	2	204895459	204896604	CRN_2016SY	204902383	SNP_2_204902383	LOC_Os07g36140.1	core histone H2A/H2B/H3/H4, putative, expressed	1188.55	940.318	1119.61	1179.54	881.637	945.893	1331.88	972.24	1236.08	982.84	807.65	1116.33	1126.29	1313.78	1369.01	770.16	1251.25	1259.98	1373.22	1338.12	1354.48	1364.93	1612.48	1229.31	915.76	1499.56	872.71	695.35	1688.4	661.15	925.97	809.43	1539.79	652.1	741.9	1011.26	960.77	609.95	829.79	490.46
183	GRMZM5G864498	2	204897772	204902815	CRN_2016SY	204902383	SNP_2_204902383	LOC_Os07g36150.1	formin-like protein 3 precursor, putative, expressed	4.93889	3.963	3.168	89.0617	7.67667	0.928571	17.0867	6.56	4.55	4.86	7.67	8.71	4.94	3.62	3.14	3.06	6.46	4.13	4.61	3.32	2.2	2.03	2.49	1.85	14.7	7.15	0.73	3.03	4.77	0	9.77	3.98	22.26	0	2.3	6.38	18.56	0	0	0
184	GRMZM2G319634	2	204931117	204944524	CRN_2016SY	204902383	SNP_2_204902383	LOC_Os07g36090.1	ribosomal protein L28 protein, putative, expressed	14.2494	8.142	17.378	13.5617	19.7	22.9971	26.1783	15.38	21.95	6.87	15.47	12.35	19.59	9.55	11.7	9.79	24.91	9.41	12.06	9.58	13.38	14.45	12.65	16.92	20.48	25.11	1.81	7.08	23.23	2.75	9.74	4.96	12.93	2.65	0	0	10.55	0	8.92	8.84
185	GRMZM5G821439	2	204949825	204954417	CRN_2016SY	204902383	SNP_2_204902383	LOC_Os07g36170.1	chitin-inducible gibberellin-responsive protein, putative, expressed	112.321	122.466	138.937	62.4367	53.54	24.84	103.273	70.2	41.79	107.26	206.04	123.45	226.83	95.52	83.34	47.18	64.19	116.48	130.48	344.52	84.93	76.44	62.27	79.73	61.13	126.58	93.16	63.21	36.7	47.01	39.23	67.73	37	183.26	149.71	135.72	144.53	175.81	176.65	183.09
186	GRMZM2G040230	2	209860388	209888481	CRD_Mean;CRN_2016SY	209923111	SNP_2_209923111;SNP_2_209923111	LOC_Os03g11110.1	zinc finger family protein, putative, expressed	7.76	10.816	12.555	46.9917	40.4667	46.84	51.3117	7.75	13.55	4.55	3.56	7.55	8.84	6.72	6.63	5.53	20.28	6.96	6.95	2.08	7.1	6.4	9.44	7.81	7.98	35.86	2.73	4.53	37.4	0	38.35	1.13	56.77	0	3.15	3.34	31.29	0	0	0
187	GRMZM2G414002	2	209912714	209928000	CRD_Mean;CRN_2016SY	209923111	SNP_2_209923111;SNP_2_209923111	LOC_Os07g40520.1	formin-like protein 20, putative, expressed	24.9989	44.5075	28.219	42.665	32.4225	31.4143	31.4183	24.67	33.48	16.75	30.67	23.31	26.56	23.53	23.38	15.46	33.16	22.97	21.53	24.43	21.73	23.52	17.11	19.73	47.99	35.3	38.51	28.47	38.03	24.33	44.27	32.93	54.27	27.89	20.11	21.51	39.58	65.75	82.53	56.03
188	GRMZM2G113512	2	209942984	209948407	CRD_Mean;CRN_2016SY	209923111	SNP_2_209923111;SNP_2_209923111	LOC_Os07g40550.1	IBS1, putative, expressed	64.3428	62.3215	81.758	58.7867	87.6733	89.42	63.5517	30.76	25.38	45.19	63.06	24.68	50.37	60.53	79.74	34.92	39.29	57.67	69.46	149.11	110.04	97.28	62.79	71.26	86.64	77.5	26.04	25.64	53.51	28.16	15.56	12.79	18.29	58.66	35.13	29.08	17.73	71.96	102.81	57.59
189	GRMZM2G113696	2	209954275	209957586	CRD_Mean;CRN_2016SY	209923111	SNP_2_209923111;SNP_2_209923111	LOC_Os07g02210.1	eukaryotic translation initiation factor 5A, putative, expressed	2589.19	2714.38	2326.49	2028.3	3113	4211.08	3209.35	2671.67	4014.34	2281.34	1901.23	2705.72	2679.8	2470.63	2549.97	1734.02	3795.87	2534.94	2682.7	1897.86	2336.34	2445.38	3042.38	2641.73	2219.42	3566.39	4458.32	2908.35	2299.91	4045.57	2572.97	2966.13	1952.42	2149.88	2117.21	1845.46	1442.11	2865.13	3067.15	2602.75
190	GRMZM2G113696	2	209954275	209957586	CRD_Mean;CRN_2016SY	209923111	SNP_2_209923111;SNP_2_209923111	LOC_Os07g40580.1	eukaryotic translation initiation factor 5A, putative, expressed	2589.19	2714.38	2326.49	2028.3	3113	4211.08	3209.35	2671.67	4014.34	2281.34	1901.23	2705.72	2679.8	2470.63	2549.97	1734.02	3795.87	2534.94	2682.7	1897.86	2336.34	2445.38	3042.38	2641.73	2219.42	3566.39	4458.32	2908.35	2299.91	4045.57	2572.97	2966.13	1952.42	2149.88	2117.21	1845.46	1442.11	2865.13	3067.15	2602.75
191	GRMZM2G115817	2	209964825	209968630	CRD_Mean;CRN_2016SY	209923111	SNP_2_209923111;SNP_2_209923111	LOC_Os07g40710.1	circadian clock coupling factor-related, putative, expressed	79.3522	56.6885	85.236	85.95	134.863	196.954	136.863	77.64	99.84	81.46	93.67	57.47	68.91	81	79.81	50.55	88.95	71.7	62.98	68.56	67.4	69.88	84.82	110.44	113.26	94.3	70.2	66.94	101.19	39.44	70.61	95.38	75.94	68.46	82.22	61.18	69.89	16.38	22.18	40.96
192	GRMZM2G072219	2	220528665	220529277	CRA_2016SY	220536089	SNP_2_220536089	LOC_Os12g13960.1	LTPL33 - Protease inhibitor/seed storage/LTP family protein precursor, expressed	0	0	1.894	0	659.438	432.724	50.8617	0	0	0	0	0	0	0	0	0	0	0	0	0	0	0	0	0	0	0	0	0	0	0	0	0	0	0	0	0	0	0	0	0
193	GRMZM2G072339	2	220570584	220580827	CRA_2016SY	220536089	SNP_2_220536089	LOC_Os11g14300.1	la domain containing protein, expressed	62.2889	90.509	110.259	114.357	101.325	88.9671	108.97	67.34	83.49	58.81	58.05	73.91	71.14	54.59	60.16	36.19	69.76	52.12	50.46	48.19	66.68	65.99	63.06	65.99	75.27	84.21	63.79	55.99	110.42	48.77	81.27	110.87	108.81	92.62	84.22	97.44	103.99	120.14	112.79	114.6
194	GRMZM2G072493	2	220581222	220581761	CRA_2016SY	220536089	SNP_2_220536089			69.7683	5.5705	8.633	0	0	0	0	102.35	153.16	63.55	78.12	56.82	44.08	48.87	56.59	35.15	147.36	47.38	54.99	21.89	63.4	61.29	81.32	53.87	85.64	85.8	25.61	0	0	0	0	0	0	0	0	0	0	0	0	0
195	AC190544.2_FG004	2	220581299	220581517	CRA_2016SY	220536089	SNP_2_220536089			22.9794	0.616	2.402	0	0	0	0	37.89	71.85	13.96	26.22	15.85	23.29	17.33	20.65	4.01	49.98	8.05	17.32	6.62	19.13	25.02	21.3	14.37	20.79	12.32	0	0	0	0	0	0	0	0	0	0	0	0	0	0
196	GRMZM2G155849	2	223257528	223270638	CRD_Mean	223258556	SNP_2_223258556	LOC_Os11g31620.1	OsFBL55 - F-box domain and LRR containing protein, expressed	121.034	116.426	163.788	142.997	104.729	36.0386	82.2817	67.98	43.72	84.23	101.44	103.79	72.49	133.14	154.65	73.77	64.23	124.37	119.5	183.25	180.75	181.79	173.13	207.84	108.55	69.63	81.94	48.63	69.3	71.01	43.02	126.26	74.75	128.72	86.23	100.42	91.65	139.14	167.47	166.64
197	GRMZM2G048576	2	236827974	236828867	CRD_2017SY	236874542	SNP_2_236874542	LOC_Os07g02590.1	expressed protein	0.156667	0	0	0	0	0	0	0	0	0	0	0	0	0	0.76	0	0	0	0	2.06	0	0	0	0	0	0	0	0	0	0	0	0	0	0	0	0	0	0	0	0
198	GRMZM5G891253	2	236829316	236832327	CRD_2017SY	236874542	SNP_2_236874542			0	0	0	0	0	0	0	0	0	0	0	0	0	0	0	0	0	0	0	0	0	0	0	0	0	0	0	0	0	0	0	0	0	0	0	0	0	0	0	0
199	GRMZM2G070503	2	236854869	236856413	CRD_2017SY	236874542	SNP_2_236874542	LOC_Os07g02630.1	expressed protein	1.58944	1.801	2.837	1.89333	2.46333	0.5	6.08333	0.46	0.55	0	1	0	1.08	1.75	2.43	0	3.33	0.77	3.05	5.16	3.15	2.73	1.06	1.42	0.67	5.25	0	0	4.53	0	1.34	0	4.61	0	0	0	1.26	0	0	0
200	AC210211.3_FG006	2	236868346	236870012	CRD_2017SY	236874542	SNP_2_236874542			0	0	0	0	0	0	0	0	0	0	0	0	0	0	0	0	0	0	0	0	0	0	0	0	0	0	0	0	0	0	0	0	0	0	0	0	0	0	0	0
201	GRMZM2G070542	2	236870724	236876652	CRD_2017SY	236874542	SNP_2_236874542	LOC_Os06g36700.1	T-complex protein, putative, expressed	338.077	247.974	381.304	332.468	481.786	770.361	553.188	412.11	902.68	172.35	149.11	163.21	458.88	253.65	276.34	185.03	728.84	266.22	280.03	146.51	298.68	289.97	342.54	297.86	461.37	740.15	113.88	153.6	469.26	116.83	401.87	136.07	444.94	155.07	108.76	126.92	204.75	171.07	238.62	173.13
202	GRMZM2G079807	3	30009781	30011670	CRA_Mean	30040926	SNP_3_30040926	LOC_Os01g01770.1	ZOS1-01 - C2H2 zinc finger protein, expressed	0	3.149	0	6.94167	0	0	0.315	0	0	0	0	0	0	0	0	0	0	0	0	0	0	0	0	0	0	0	26.73	4.54	0	0	0	20.35	2.88	4.86	0	3.62	0	0	0	0
203	GRMZM2G115352	3	30039987	30042075	CRA_Mean	30040926	SNP_3_30040926	LOC_Os02g52140.2	RNA recognition motif containing protein, putative, expressed	0	0	0	0	0	0	0	0	0	0	0	0	0	0	0	0	0	0	0	0	0	0	0	0	0	0	0	0	0	0	0	0	0	0	0	0	0	0	0	0
204	GRMZM2G171677	3	30054877	30058988	CRA_Mean	30040926	SNP_3_30040926	LOC_Os01g01740.1	protein kinase domain containing protein, expressed	81.2494	38.99	63.726	128.36	90.2992	3.23714	91.1267	138.65	147.8	91.86	157.23	115.08	116.52	65.8	63.86	46.02	112.57	57.31	64.76	31.74	44.29	44.63	47.6	56.47	60.3	171.58	74.94	53.35	123.61	53.88	24.58	16.59	49.05	4.96	14	19.19	29.91	19.83	10.76	9.61
205	GRMZM2G451941	3	89593509	89595088	CRN_Mean;CRN_2015SY	89591382	SNP_3_89591382;SNP_3_89591402	LOC_Os12g32310.1	expressed protein	0	0	0	0	0	0	0	0	0	0	0	0	0	0	0	0	0	0	0	0	0	0	0	0	0	0	0	0	0	0	0	0	0	0	0	0	0	0	0	0
206	GRMZM2G503156	3	89617869	89622081	CRN_Mean;CRN_2015SY	89591382	SNP_3_89591382;SNP_3_89591402	LOC_Os12g42660.1	AGC_AGC_other_GWLd.1 - ACG kinases include homologs to PKA, PKG and PKC, expressed	4.51944	0	0.183	48.4217	0.858333	0	1.07667	9.17	17.91	3.03	13.52	0	3.1	6.71	3.24	2.93	8.44	0.89	4.64	4.2	0.46	0.31	1.23	1.57	0	0	0	0	0	0	0	0	0	0	0	0	0	0	0	0
207	AC191790.3_FG005	3	89634305	89636341	CRN_Mean;CRN_2015SY	89591382	SNP_3_89591382;SNP_3_89591402	LOC_Os06g27610.1	expressed protein	0	0	0	0	0	0	0	0	0	0	0	0	0	0	0	0	0	0	0	0	0	0	0	0	0	0	0	0	0	0	0	0	0	0	0	0	0	0	0	0
208	GRMZM5G878270	3	105348674	105348943	CRA_2016SY	105362640	SNP_3_105362640			18.3278	14.0055	36.757	22.7433	34.1708	26.3643	14.9567	23.36	6.36	8.74	26.32	26.36	0	17.54	18.81	9.03	16.14	11.55	16.82	25.95	20.84	16.2	25.82	38.93	21.13	10.43	10.23	17.58	37.88	0	14.29	21.05	23.72	0	58.23	0	0	0	0	22.93
209	GRMZM2G156813	3	105359846	105361742	CRA_2016SY	105362640	SNP_3_105362640	LOC_Os12g29950.1	nodulin, putative, expressed	9.57722	10.0955	0.265	0	0	0	0	13.18	19.69	3.11	13.33	0	5.34	16.69	15.3	11.55	8.79	1.22	23.12	10.05	6.25	9.07	6.01	9.18	0.51	0.54	0	0	0	0	0	0	0	5.81	0	0	0	24.89	36.34	11.35
210	GRMZM2G701704	3	125597256	125597471	CRD_Mean	125641491	SNP_3_125641491			0	0	0	0	0	0	0	0	0	0	0	0	0	0	0	0	0	0	0	0	0	0	0	0	0	0	0	0	0	0	0	0	0	0	0	0	0	0	0	0
211	GRMZM2G151717	3	125632832	125637656	CRD_Mean	125641491	SNP_3_125641491	LOC_Os12g38620.1	bromodomain associated family protein, expressed	20.0894	20.9495	30.5	32.225	35.0383	38.9543	38.63	15.73	16.41	20.66	22.29	14.62	17.15	16.48	19.77	11.93	15.18	17.53	17.37	20.68	27.58	25.83	26.09	30.35	25.96	24.13	9.44	18.01	34.99	15.57	36.76	14.04	32	17	22.31	30.04	27.87	18.75	13.85	13.33
212	AC206425.3_FG002	3	131958379	131959124	CRN_2016SY	131956549	SNP_3_131956549	LOC_Os04g24478.1	jasmonate-induced protein, putative, expressed	2316.42	350.284	13.227	0.651667	9.78	0	171.628	6205.36	32.73	9867.72	13019.6	84.8	10252.1	553.89	122.66	207.93	18.73	244.49	67.67	77.68	49.45	57.87	299.91	87.25	445.66	6959.01	37.05	0	3.64	5.98	0	0	0	0	0	0	0	0	0	0
213	GRMZM2G701746	3	132004061	132005975	CRN_2016SY	131956549	SNP_3_131956549			27.8767	13.498	2.923	1.87667	2.57667	0	7.855	51.34	25.37	51.23	90.86	5.88	48.81	14.88	14.96	13.45	16.04	10.38	7.44	9.82	15.82	14.32	25.73	15.41	70.04	68.37	44.4	24.12	0	21.26	1.8	8.19	2.68	13.13	0	0	0	5.48	11.86	26.93
214	GRMZM2G167668	3	148595247	148596450	CRN_Mean	148582193	SNP_3_148582193			14.5767	37.9565	20.369	32.3533	29.4	39.5929	46.7417	11.42	26.77	14.23	15.41	9.4	14.03	17.65	15.17	10.04	21.1	7.88	8.92	13.38	16.46	13.15	14.13	16.81	16.43	19.59	45.06	31.76	19.08	71.63	22.27	78.6	31.91	46.53	43.83	37.24	31.93	38.72	25.19	52.17
215	GRMZM2G701806	3	148622986	148623520	CRN_Mean	148582193	SNP_3_148582193			0	0	0	0	0	0	0	0	0	0	0	0	0	0	0	0	0	0	0	0	0	0	0	0	0	0	0	0	0	0	0	0	0	0	0	0	0	0	0	0
216	GRMZM2G068913	3	152214617	152221102	CRN_Mean	152205494	SNP_3_152205494	LOC_Os01g71320.1	hexokinase, putative, expressed	64.2122	45.9985	48.053	88.4683	102.662	164.403	84.625	61.68	118.69	45.36	69.07	41.6	93.35	47.23	44.18	34.23	100.44	53.91	64.68	66.84	55.75	57.1	60.13	43.11	98.47	77.76	28.3	39.13	53.11	51.19	109.78	34.7	92.27	30.21	21.49	21.22	96.7	31.26	21.59	23.43
217	GRMZM2G050997	3	152240440	152243093	CRN_Mean	152205494	SNP_3_152205494	LOC_Os01g71310.1	cytokinin dehydrogenase precursor, putative, expressed	9.27111	143.297	60.031	13.865	10.8333	19.5157	3.56667	1.53	0	3.32	3.12	5.07	1.78	7.46	17.47	5.74	0.89	6.41	9.67	31.75	32.15	20.12	5.29	5.62	9.49	6.12	73.17	32.18	15.02	42.93	8.34	87.65	2.41	120.52	33.74	17.03	13.92	208.92	149.01	172.14
218	GRMZM2G086940	3	161692885	161693933	CRA_2016SY	161742632	SNP_3_161742632	LOC_Os01g68840.1	CRP6 - Cysteine-rich family protein precursor, expressed	39.8922	15.826	40.152	84.2933	115.705	169.976	91.4683	28.72	31.3	51.68	33.21	35.78	33.34	45.72	48.96	26.66	38.34	42.48	41.04	44.93	50.53	47.57	46.5	34.94	36.36	48.82	0	13.78	66.99	0	39.19	2.3	41.71	8.85	25.1	33.8	28.28	0	0	0
219	GRMZM2G149837	3	161742998	161746275	CRA_2016SY	161742632	SNP_3_161742632	LOC_Os01g68830.1	expressed protein	34.2761	37.068	29.129	72.0567	68.5642	19.0643	81.3767	43.23	69.54	35.55	28.1	63.32	51.89	22.28	18.81	20.45	66.4	19.6	25.25	5.51	16.6	18.75	25.77	17.84	68.08	103.29	25.57	41.07	71.84	12.04	120.91	16.8	134.75	2.08	56.92	56.39	99.7	0	0	0
220	GRMZM2G103812	3	161771975	161775440	CRA_2016SY	161742632	SNP_3_161742632	LOC_Os01g68770.1	selenium-binding protein, putative, expressed	473.158	846.596	900.757	782.003	865.469	897.036	1146.88	438.38	375.56	457.39	715.79	247.76	262.9	409.73	463.15	223.34	279.46	241.45	291.15	585.72	689.23	692.03	569.59	599.58	974.64	860.1	555.38	720.3	537.54	1367.57	588.74	737.42	571.49	503.26	312.8	363.88	446.67	590.73	777.46	977.9
221	GRMZM2G085113	3	165216844	165220769	CRN_Mean	165212180	SNP_3_165212180	LOC_Os01g68000.1	AML1, putative, expressed	0.707778	0.072	0.93	0.86	0	0	2.20667	0	0	0	0	0	1.14	1	0.45	0.63	1.42	0	0.47	0	2.45	0.92	0.51	1.2	2.55	0.41	0	0	1.03	0	0	0	0	0	0	0	0	0	0	0
222	GRMZM2G126083	3	181803011	181804893	CRD_Mean	181815959	SNP_3_181815959	LOC_Os01g62010.1	hydrolase, alpha/beta fold family domain containing protein, expressed	5.85056	3.0865	0	0	6.96667	23.2643	0	0	0	2.08	0.9	0	0	2.56	2.63	1.47	1.98	0	0	3.84	68.44	8.27	4.36	8.78	0	0	0	0	0	0	0	0	0	0	0	0	0	0	0	0
223	GRMZM2G126077	3	181805680	181807081	CRD_Mean	181815959	SNP_3_181815959	LOC_Os01g62000.1	pectate lyase 4 precursor, putative, expressed	0.738333	0	0	0	0	0	0	0	0	1.23	0	0	0	4.71	1.99	1.08	0	0	0	4.28	0	0	0	0	0	0	0	0	0	0	0	0	0	0	0	0	0	0	0	0
224	GRMZM2G123977	3	181812170	181816113	CRD_Mean	181815959	SNP_3_181815959	LOC_Os01g61990.1	ankyrin repeat-containing protein, putative, expressed	75.2922	36.5015	32.239	56.53	52.0867	77.1543	28.6917	64.74	18.43	131.3	110.13	86.24	76.38	86.84	90.67	45.5	30.66	99.65	95.19	188.78	56.59	53.43	36.57	55.04	29.12	69.72	19.68	23.38	6.86	11.4	29.97	7.48	14.07	43.83	41.08	46.06	39.32	27.77	45.45	31.56
225	GRMZM2G124016	3	181820683	181822103	CRD_Mean	181815959	SNP_3_181815959	LOC_Os01g61980.1	expressed protein	17.7533	0.056	0.963	0.73	0.0191667	0	0	21.2	2.95	29.7	18.22	44.09	12.61	18.75	26.3	10.68	10.76	16.52	16.32	15.55	27.58	20.03	15.02	11.81	1.47	1.12	0	0	0	0	0	0	0	0	0	0	0	0	0	0
226	AC214448.3_FG007	3	181844889	181846241	CRD_Mean	181815959	SNP_3_181815959	LOC_Os01g61970.1	Lung seven transmembrane receptor domain containing protein, putative, expressed	498.793	501.985	392.728	410.453	446.503	200.603	304.155	485.82	525.95	470.74	566.96	647.43	490.31	472.81	528.65	337.79	531.6	547.87	577.75	617.88	466.63	458.99	433.83	415.78	401.48	493.99	239.99	349.98	406.78	234.22	651.15	264.09	439.54	471.07	551.97	723.67	882.62	425.2	613.94	621.29
227	GRMZM2G049893	3	181860242	181863240	CRD_Mean	181815959	SNP_3_181815959	LOC_Os02g18820.1	WD domain, G-beta repeat domain containing protein, expressed	0.256111	0.299	0.718	0.44	4.80583	12.5357	0.611667	0	0.15	0.31	0.51	0.3	0	0.1	0.19	0	0.41	0.27	0.32	0.67	0.4	0.46	0.24	0.15	0.13	0.26	0	0	0	0	0	0	0.31	0.34	0	0	0	0	0.94	0
228	GRMZM2G014720	3	182952380	182955812	CRD_2017SY	182982559	SNP_3_182982559	LOC_Os01g61500.1	BAG domain containing protein, expressed	227.6	212.224	141.828	232.335	108.021	85.5629	84.7433	195.53	59.72	283.72	173.14	513.89	176.14	192.13	187.18	126.01	101.36	143.16	198.34	152.78	173.26	224.09	434.4	477.38	284.57	99.84	300.77	245.27	102.48	312.98	193.49	217.7	87.37	127.06	360.01	453.19	402.31	170.89	191.7	143.35
229	AC194425.3_FG005	3	191337216	191338021	CRD_Mean;CRD_2016SY	191323638	3:191323638;3:191323638	LOC_Os01g57050.1	expressed protein	176.583	34.086	25.493	24.5517	37.2075	35.41	6.335	254.75	4.58	423.73	256.7	365.64	35.94	176.44	206.32	104.8	11.15	85.64	127.6	130.02	130.69	170.33	327.85	326.05	40.26	13.13	16.43	22.15	8.51	11.91	1.82	10.42	0	4.78	269.58	292.9	30.09	0	0	0
230	GRMZM2G136665	3	191353781	191364146	CRD_Mean;CRD_2016SY	191323638	3:191323638;3:191323638	LOC_Os12g10670.1	AAA-type ATPase family protein, putative, expressed	25.7228	19.7735	32.005	55.1333	29.8617	13.8771	59.4267	35.2	74.18	11.6	11.29	20.12	39.69	19.93	17.79	17.2	64.77	19.23	26.06	6	13.01	14.84	20.01	21.53	30.56	84.33	4.28	11.4	78.35	0.58	57.41	1.43	76.44	0.49	11.26	17.38	48.03	0	0	0
231	GRMZM2G436856	3	191372100	191372655	CRD_Mean;CRD_2016SY	191323638	3:191323638;3:191323638			153.934	4.0575	17.96	620.683	0	0.354286	0	474.04	142.32	430.81	698.12	11.04	88.18	73.23	74.06	40.19	147.9	15.86	152.18	250.18	0	9.08	78.12	45.85	39.66	56.99	0	0	0	0	6.05	0	0	0	18.11	0	0	0	0	0
232	GRMZM2G042754	3	198650552	198653640	CRA_2016SY	198695763	SNP_3_198695763	LOC_Os01g54810.1	lipase, putative, expressed	14.92	7.1905	16.237	27.43	14.0075	10.8457	44.6517	15.53	32.23	15.07	5.92	18.16	25.1	18.81	14.29	12.47	28.63	23.73	16.28	4.98	5.18	7.11	12.49	7.12	5.46	38.99	0	1.94	51.77	0	13.96	0	34.7	0	0	0	2.45	0	0	0
233	GRMZM2G042818	3	198661214	198665961	CRA_2016SY	198695763	SNP_3_198695763	LOC_Os01g54860.1	enoyl-CoA hydratase/isomerase family protein, putative, expressed	230.921	95.466	89.93	130.628	85.4508	3.33571	115.385	253.08	118.14	334.87	359.89	409.8	229.03	254.33	211.58	176.34	112.25	233.97	215.61	167.66	179.07	196.22	236.88	258.53	209.32	169.62	78.39	123.84	113.79	93.02	143.8	85.24	107.35	62.06	176.16	195.36	173.78	29.11	24.27	47.02
234	GRMZM2G474326	3	198667814	198668962	CRA_2016SY	198695763	SNP_3_198695763	LOC_Os01g54890.1	ethylene-responsive transcription factor 2, putative, expressed	10.9533	31.676	3.57	0.721667	0	0	1.77	4.03	0	8.06	1.89	10.19	0	18.49	33.84	16.66	2.77	11.14	11.28	25.5	16.62	16.94	10.1	9.65	0	2.63	23.39	40.46	0	75.09	0	90.4	0	77.46	31.42	0	0	36.25	37.15	26.4
235	GRMZM2G176699	3	198669424	198678240	CRA_2016SY	198695763	SNP_3_198695763	LOC_Os01g54900.1	lipid-A-disaccharide synthase family protein, expressed	22.945	22.9345	24.506	39.585	28.5867	32.1471	39.6983	29.18	39.46	19.89	30.27	24.83	24.42	21.46	24.65	16.68	30.57	20.17	21.16	16.42	17.64	17.61	17.41	20.99	20.2	33.86	22.57	24.32	27.09	19.62	23.08	33.02	39.76	23.56	32.62	25.24	25.18	19.53	9.36	21.63
236	GRMZM2G128688	3	198739066	198756047	CRA_2016SY	198695763	SNP_3_198695763	LOC_Os01g54910.1	GTP-binding protein typA/bipA, putative, expressed	93.8644	69.775	92.645	94.69	110.938	156.066	178.158	112.96	205.06	70.88	71.9	78.53	116.99	73.32	82.36	54.88	177.89	93.72	82.65	49.62	83.98	87.11	74.76	71.98	100.97	178.89	53.4	55.98	80.95	52.69	83.43	79.17	114.7	49.62	55.53	51.39	54.17	46.94	49.69	58.68
237	GRMZM2G023285	3	200770762	200772307	CRD_Mean;CRD_Mean	200817163	SNP_3_200817163;SNP_3_200817163	LOC_Os01g53160.1	DUF623 domain containing protein, expressed	17.3822	14.6865	3.679	15.6817	3.07167	0	30.2783	23.13	14.07	13.23	38.09	10.38	27.05	19.66	19.77	11.99	14.12	10.04	18.2	33.26	5.72	12.49	14.38	15.58	11.72	10.64	0	10.76	7.41	0	33.87	0	18.71	2.31	29.7	56.1	124.23	0	0	0
238	GRMZM2G022625	3	200773599	200779461	CRD_Mean;CRD_Mean	200817163	SNP_3_200817163;SNP_3_200817163	LOC_Os01g53150.1	GTPase of unknown function domain containing protein, putative, expressed	50.9306	504.111	100.544	80.615	69.8458	98.3	73.7667	42.14	40.04	39.71	47.99	42.4	45.88	48.15	52.34	29.47	44.86	49.27	51.39	59.71	59.5	59.57	56.66	65.05	82.62	118.82	959.62	732.66	71.95	1237.26	289.68	987.51	133.92	498.09	392.22	322.69	186.08	427.78	505.42	507.45
239	GRMZM2G012174	3	200829117	200833808	CRD_Mean;CRD_Mean	200817163	SNP_3_200817163;SNP_3_200817163	LOC_Os05g22870.1	PPR repeat domain containing protein, putative, expressed	4.92389	20.4	5.154	9.78167	10.1308	18.0171	5.535	6.38	6.66	6.11	7.42	4.95	4.18	5.17	7.12	3.54	4.68	4.79	5.72	3.73	3.21	3.66	3.51	4.51	3.29	23.82	45.91	40.99	5.6	21.29	37.71	40.61	29.76	9.55	25.71	31.82	19.62	9.8	10.13	16.22
240	GRMZM2G311347	3	201322694	201323761	CRD_Mean	201371688	3:201371688	LOC_Os01g52740.1	expressed protein	2.50389	8.529	1.294	2.69	0.731667	3.91	0	1.93	0	3	0	4.29	0	6.24	7.52	2.78	0	0	2.43	11.38	2.13	1.67	0	0	1.7	0	0	1.89	0	0	0	0	0	0	0	3.24	0	0	0	0
241	GRMZM2G014770	3	201327569	201331565	CRD_Mean	201371688	3:201371688	LOC_Os01g52710.1	glycosyl transferase 8 domain containing protein, putative, expressed	11.4528	17.2515	3.234	15.09	6.4825	0	36.3333	19.08	10.32	27.45	28.7	20.07	18.67	7.72	5.99	4.47	17.18	7.05	6.07	4.52	2.06	3.02	5.87	4.49	13.42	21	40.31	30.83	2.2	9.22	30.6	0	14.7	2.4	46.63	74.24	72.9	0	0	0
242	GRMZM2G079727	3	201371185	201375806	CRD_Mean	201371688	3:201371688	LOC_Os01g52680.1	OsMADS32 - MADS-box family gene with MIKCc type-box, expressed	0.0594444	2.154	5.527	84.42	9.91667	4.54429	0	0	0	0	0	0	0	0	0.24	0	0.11	0	0	0	0	0	0.53	0.19	0	0.2	4.67	10.72	0	12.21	0	9.23	0	0.87	0	0	0	2.23	0	0
243	GRMZM2G079883	3	201381760	201383015	CRD_Mean	201371688	3:201371688	LOC_Os01g52660.1	POEI51 - Pollen Ole e I allergen and extensin family protein precursor, expressed	102.933	0.7995	6.494	0	0.240833	0	62.425	99.06	254.32	25.09	14.65	1.82	76.33	116.14	113.53	78.2	360.39	174.31	188.35	20.28	67.47	91.98	113.93	56.95	0	15.99	0	0	0	0	0	0	0	0	0	0	0	0	0	0
244	GRMZM2G079897	3	201391665	201392448	CRD_Mean	201371688	3:201371688	LOC_Os01g52650.1	POEI44 - Pollen Ole e I allergen and extensin family protein precursor, expressed	3.84389	0	0	0	0	0	0	15.56	32.94	0	0	0	4.06	0	0.91	0	5.95	0	3.55	0	0	0	3	3.22	0	0	0	0	0	0	0	0	0	0	0	0	0	0	0	0
245	GRMZM2G079904	3	201395366	201402538	CRD_Mean	201371688	3:201371688	LOC_Os01g52640.3	suppressor of phythchrome A, putative, expressed	10.875	287.053	56.533	63.49	22.6675	6.56429	29.09	16.71	15.61	14.34	30.3	19.44	12.15	8.09	7	7.31	9.13	4.87	4.15	5.73	2.05	2.07	4	5.91	26.89	46.19	430.63	368.12	59.06	643.33	70.16	519.89	30.68	206.57	60.59	27.89	22.46	443.67	395.63	323.74
246	GRMZM2G104226	3	214143658	214147325	CRD_2015SY	214173149	SNP_3_214173149	LOC_Os01g46080.1	GDSL-like lipase/acylhydrolase, putative, expressed	20.7094	53.0045	45.301	14.4733	17.9508	18.8971	18.1867	16.66	15	19.82	14.09	18.79	18.66	22.62	28.38	16.02	17.65	23.71	24.12	32.98	30.52	25.61	19.34	18.34	10.46	9.56	41.26	21.35	12.36	34.68	9.46	32.07	11.19	43.25	19.73	6.16	11.26	87.54	87.08	56.82
247	GRMZM2G375602	3	214204276	214205763	CRD_2015SY	214173149	SNP_3_214173149	LOC_Os01g46210.1	GDSL-like lipase/acylhydrolase, putative, expressed	0	0	0	0	0.159167	0	0	0	0	0	0	0	0	0	0	0	0	0	0	0	0	0	0	0	0	0	0	0	0	0	0	0	0	0	0	0	0	0	0	0
248	GRMZM2G365688	3	223690797	223697299	CRD_Mean	223745521	SNP_3_223745521	LOC_Os02g40510.1	response regulator receiver domain containing protein, expressed	7.395	17.079	14.357	12.1483	6.4225	3.83429	6.94667	6.17	3.73	8.07	10.82	8.63	5.39	8.72	7.98	5.35	4.71	8.52	7.49	9.49	7.67	8.37	6.08	8.78	7.14	7.98	14.89	15.48	7.04	17.79	9.06	24.86	11.27	14.14	13.1	8.8	11.62	16.87	18.57	23.65
249	GRMZM2G468521	3	223728228	223739116	CRD_Mean	223745521	SNP_3_223745521	LOC_Os11g17290.3	expressed protein	0	0	0	0	0	0	0	0	0	0	0	0	0	0	0	0	0	0	0	0	0	0	0	0	0	0	0	0	0	0	0	0	0	0	0	0	0	0	0	0
250	GRMZM2G071977	3	223767189	223769272	CRD_Mean	223745521	SNP_3_223745521	LOC_Os01g41900.1	Myb transcription factor, putative, expressed	58.2172	53.5885	58.746	27.0783	15.225	28.77	5.17833	73.35	10.66	83.56	50.64	189.72	29.49	54.61	75.67	43.38	7.12	49.26	53.2	78.38	79.01	57.12	53.54	35.2	24	31.8	209.1	120.26	10.22	76.57	23.71	118.03	11.41	40.47	60.21	62.28	21.56	90.82	41.47	28.93
251	GRMZM2G072028	3	223769796	223771475	CRD_Mean	223745521	SNP_3_223745521	LOC_Os01g41950.1	expressed protein	3.47444	1.5585	5.64	8.58333	7.10833	4.17857	8.42	4.47	2.62	1	2.01	3.55	1.44	4.46	5.25	2.86	4.31	4.67	3.83	4.42	3.99	2.85	3.98	4.26	2.57	3.86	0	0	8.42	0	2.84	3.13	5.67	0	0	0	0	0	0	0
252	GRMZM2G072052	3	223776106	223777096	CRD_Mean	223745521	SNP_3_223745521	LOC_Os01g41990.1	OsCML12 - Calmodulin-related calcium sensor protein, expressed	0.386667	3.3805	0.702	17.3867	0	0	0	0	0	0	0	0	0	0	4.81	0	0	0	0	0	0	1.48	0	0.67	0	0	0	0	0	0	0	0	0	4.4	0	0	0	0	22.09	0
253	GRMZM2G072080	3	223777623	223781783	CRD_Mean	223745521	SNP_3_223745521	LOC_Os01g42010.1	expressed protein	235.947	92.1575	105.263	128.487	107.839	64.2671	95.7067	335.75	486.97	224.34	376.11	230.27	319.04	239.66	174.38	157.11	342.52	162.36	206.23	160.82	146.39	156.93	187.16	178.03	162.97	245.36	81.05	113.14	90.33	58.58	180.87	66.03	138.81	83.77	114.62	127.52	138.94	43.52	60.28	51.27
254	GRMZM2G113373	4	9857198	9864697	CRN_2016SY	9886170	SNP_4_9886170	LOC_Os11g20360.2	expressed protein	9.30889	36.0545	37.617	88.1267	68.4283	3.00286	162.378	8.12	15.08	5.86	5.07	5.72	10.68	7.31	8	6.46	19.07	9.98	9.79	1.54	7.71	8.11	11.02	11.98	16.06	71.52	7.49	23.39	118.32	0	143.98	2.5	199.22	0	19.67	32.55	102.45	0	0	0
255	GRMZM2G113470	4	9896475	9902642	CRN_2016SY	9886170	SNP_4_9886170	LOC_Os01g08660.1	aquaporin protein, putative, expressed	306.023	231.417	221.598	204.698	590.633	1260.58	259.737	295.19	215.85	412.32	400.53	254.59	297.21	378.6	369	235.67	232.08	321.98	252.91	355.74	324.61	259.04	326.7	289.28	287.12	193.92	166.81	117.63	151.07	143.75	141.5	172.04	143.78	345.77	285.15	292.97	218.6	344.58	437.1	188.75
256	GRMZM2G104833	4	10771404	10781735	CRN_2015SY	10804837	SNP_4_10804837	LOC_Os11g13810.1	non-lysosomal glucosylceramidase, putative, expressed	50.4328	77.8695	73.623	73.0267	75.41	74.31	65.575	43.37	42.75	45.39	57.05	68.8	64.46	48.95	49.29	32.34	55.31	42.96	47.81	58.77	43.13	45.1	44.51	57.21	60.59	69.66	75.61	49.26	55.97	74.5	41.64	74.98	43.56	82.99	51.78	53.07	38.71	130.46	111.08	92.44
257	GRMZM2G407605	4	10802947	10805414	CRN_2015SY	10804837	SNP_4_10804837	LOC_Os11g13820.1	protein phosphatase 2C, putative, expressed	0	0	0	0	0	0	0	0	0	0	0	0	0	0	0	0	0	0	0	0	0	0	0	0	0	0	0	0	0	0	0	0	0	0	0	0	0	0	0	0
258	GRMZM2G407623	4	10810945	10815502	CRN_2015SY	10804837	SNP_4_10804837	LOC_Os12g09640.1	protein phosphatase 2C, putative, expressed	0	0	0	0	0	0	0	0	0	0	0	0	0	0	0	0	0	0	0	0	0	0	0	0	0	0	0	0	0	0	0	0	0	0	0	0	0	0	0	0
259	GRMZM5G866334	4	14654927	14656796	CRD_2015SY	14699281	SNP_4_14699281	LOC_Os11g17930.1	expressed protein	145.513	310.483	103.968	125.595	80.4675	64.9429	72.1433	124.63	147.1	161	177.96	97.21	119.04	178.67	212.9	121.06	135.48	151.9	145.41	254.57	146.39	131.9	102.15	104.64	107.23	107.61	346.62	171.87	55.17	165.87	66.45	118.36	49.17	285.17	91.9	95.8	124.17	386.06	491.45	226.07
260	GRMZM2G104147	4	14700256	14708619	CRD_2015SY	14699281	SNP_4_14699281	LOC_Os11g09140.1	DUF803 domain containing, putative, expressed	52.1294	141.459	38.497	53.035	59.3717	15.1729	37.99	64.01	80.62	49.6	90.73	69.45	60.33	41.67	39.71	30.64	75.22	38.66	43.29	27.92	25.35	33.56	49.57	58.41	59.59	44.6	156.32	113.41	40.85	292.43	67.57	94.32	40.1	154.77	57.66	56.95	97.6	334.49	274.31	163.49
261	GRMZM2G001043	4	14745233	14746187	CRD_2015SY	14699281	SNP_4_14699281	LOC_Os11g09150.1	expressed protein	3.34111	12.938	10.157	13.0767	1.9975	0	0.866667	1.96	0	1.06	3.88	7.32	5.03	1	2.39	1.76	0	0	0	1.21	2.52	2.83	14.91	13.59	0.68	2.83	0	0	8.19	0	16.49	0	13.77	4.04	75.89	81.27	56.28	0	0	0
262	GRMZM2G001048	4	14748387	14751790	CRD_2015SY	14699281	SNP_4_14699281	LOC_Os11g09160.1	B3 DNA binding domain containing protein, expressed	55.6078	44.017	53.941	165.617	96.0117	45.8629	188.275	50.23	32.96	72.28	89.6	59.28	25.8	55.99	52.66	38.41	43.74	64.99	46.13	57	49.59	60.02	69.43	56.24	76.59	56.36	16.08	22.7	91.42	10.84	65.38	21.58	91.98	34.22	33.42	58.49	70.15	31.46	30.48	44.75
263	GRMZM2G315264	4	16391247	16399122	CRA_2016SY	16441465	4:16441465	LOC_Os11g11340.1	CIP111, putative, expressed	20.2156	18.63	33.204	31.2733	37.7125	46.6	36.09	18.95	30.41	14.39	15.08	18.25	21.9	14.72	17.22	10.39	30.24	22.64	16.83	17.16	24.45	23.02	17.42	25.47	25.34	36.2	9.39	12.92	37.49	8.58	26.93	22.74	37.81	18.38	18.01	19.08	22.92	9.35	8.16	21.67
264	GRMZM2G031615	4	16440811	16449027	CRA_2016SY	16441465	SNP_4_16441465	LOC_Os11g11410.1	OsIAA27 - Auxin-responsive Aux/IAA gene family member, expressed	37.8544	11.0445	20.761	18.7833	4.38667	0	5.35167	38.98	48.82	26.8	9.7	73.05	20.45	37.72	40.84	29.68	39.5	61.28	26.89	11.61	42.86	40.36	55.71	40.66	36.47	17.56	0	6.05	52.49	0	43.71	1.17	50.13	0	4.4	4.88	40.5	0	0	0
265	GRMZM2G026459	4	26006898	26012539	CRA_2015SY	26059605	SNP_4_26059605	LOC_Os04g36040.1	peptide transporter PTR2, putative, expressed	21.6722	34.9115	16.611	78.7383	5.94417	0.204286	2.96333	27.89	58.73	14.82	18.83	10.67	37.65	18.91	14.67	11.82	43.02	7.84	18.62	7.17	12.59	12.89	15.29	15.33	43.36	144.7	4.27	22.89	36.97	0	125.93	0	76.88	0	29.58	33.71	223.3	0	0	0
266	GRMZM2G702378	4	26016510	26016963	CRA_2015SY	26059605	SNP_4_26059605			0	0	0	0	0	0	0	0	0	0	0	0	0	0	0	0	0	0	0	0	0	0	0	0	0	0	0	0	0	0	0	0	0	0	0	0	0	0	0	0
267	GRMZM2G026724	4	26018402	26019583	CRA_2015SY	26059605	SNP_4_26059605	LOC_Os08g13000.1	MBTB20 - Bric-a-Brac, Tramtrack, Broad Complex BTB domain with Meprin and TRAF Homology MATH domain, expressed	0	0	0	0	0	0	0	0	0	0	0	0	0	0	0	0	0	0	0	0	0	0	0	0	0	0	0	0	0	0	0	0	0	0	0	0	0	0	0	0
268	AC184169.3_FG001	4	26820783	26821926	CRD_2016SY	26870903	SNP_4_26870903	LOC_Os11g16540.1	tetratricopeptide repeat domain containing protein, expressed	20.9789	15.3765	26.693	28.4317	41.6875	76.5314	49.99	22.78	42.65	9.47	19.84	21.24	19.8	18.22	17.56	10.27	37.01	31.3	22.63	21.45	18.3	16.58	13.6	14.53	20.39	42.18	6.46	11.05	21.09	4.95	13.93	15.89	35.45	5.74	14.48	25.02	32.53	8.26	17.65	0
269	GRMZM2G146862	4	26847956	26889077	CRD_2016SY	26870903	SNP_4_26870903	LOC_Os11g16540.1	tetratricopeptide repeat domain containing protein, expressed	48.7611	38.1175	59.483	60.88	94.1767	183.749	79.5167	49.12	71.97	49.07	36.88	47.05	33.51	47.24	53.54	23.95	64.17	42.94	43.66	43.68	54.55	49.19	53.99	54.33	58.86	64.64	22.41	30.68	46.44	19.78	30.58	33.83	61.34	36.31	40.22	33.88	37.45	32.58	21.77	13.69
270	GRMZM2G093900	4	26919963	26927993	CRD_2016SY	26870903	SNP_4_26870903	LOC_Os08g10510.1	aminotransferase, putative, expressed	193.068	87.119	132.597	189.103	185.219	105.956	189.373	164.83	43	234.71	147.65	510.03	213.27	260.1	371.49	177.84	72.63	201.44	109.92	191.68	149.3	156.27	148.9	186.42	135.74	160.61	45.6	91.54	169.79	59.91	191.35	55.29	214.3	49.35	30.95	26.79	140.08	80.98	61.64	61.65
271	GRMZM2G092535	4	33459369	33463425	CRA_Mean	33468689	SNP_4_33468689	LOC_Os04g39444.1	LSM domain containing protein, expressed	353.36	316.282	593.632	302.655	517.536	718.65	608.91	290.37	463.85	301.26	233.07	235.58	281.54	308.84	316.83	191.48	441.95	293.36	338.13	291.31	412.9	390	547.58	501.18	521.25	372.31	182.8	167.8	391.63	220.61	248.24	180.5	318.62	243.44	189.23	241.17	304.15	372.58	575.27	312.52
272	GRMZM2G092451	4	33464611	33468871	CRA_Mean	33468689	SNP_4_33468689	LOC_Os08g05840.1	DNA topoisomerase 1, putative, expressed	169.948	192.606	196.096	222.527	609.961	1518.05	221.837	179.18	217.71	144.57	158.22	166.17	164.8	164.45	182.32	107.36	199.91	162.33	158.23	163.15	171.1	176.78	160.52	174.44	207.82	251.32	256	240.05	183.87	181.47	219.86	242.4	267.41	134.66	150.2	167.84	170.79	172.55	162.45	197.77
273	GRMZM2G100583	4	46961569	46964308	CRN_Mean	46969796	SNP_4_46969796	LOC_Os08g42400.1	no apical meristem protein, putative, expressed	119.406	580.529	282.017	41.21	18.2417	0.341429	21.4233	121.35	116.64	125.05	159.41	73.25	100.09	127.78	153.53	85.77	77.03	88.3	116.45	322.59	172.74	136.69	66.99	71.3	34.34	28.68	79.69	99.05	2.17	121.01	21.48	79.53	8.63	280.8	75.05	48.36	28.23	1224.32	1994.3	588.83
274	GRMZM2G129090	4	46984892	46988201	CRN_Mean	46969796	SNP_4_46969796			0	0	0	0	0	0	0	0	0	0	0	0	0	0	0	0	0	0	0	0	0	0	0	0	0	0	0	0	0	0	0	0	0	0	0	0	0	0	0	0
275	GRMZM2G155873	4	52201953	52202656	CRN_Mean;CRN_Mean	52225680	SNP_4_52225680;SNP_4_52225680			0.0494444	0	0	1.43	0	0	0	0	0	0	0	0	0	0	0.89	0	0	0	0	0	0	0	0	0	0	0	0	0	0	0	0	0	0	0	0	0	0	0	0	0
276	AC205615.4_FG002	4	74780726	74795850	CRD_Mean	74844221	SNP_4_74844221	LOC_Os04g57380.1	acyl-protein thioesterase, putative, expressed	0	0	0	0	0	0	0	0	0	0	0	0	0	0	0	0	0	0	0	0	0	0	0	0	0	0	0	0	0	0	0	0	0	0	0	0	0	0	0	0
277	GRMZM2G089698	4	86309091	86310926	CRA_Mean	86323429	SNP_4_86323429	LOC_Os09g25460.1	transferase family protein, putative, expressed	27.3344	253.426	192.347	170.442	104.62	0	154.895	0	0	1.1	0	0	0	8.35	9.73	2.53	0	0	3.93	19.5	26.4	18.59	20.39	12.04	369.46	110.67	12.17	67.62	230.81	48.83	232.39	9.48	242.15	155.56	50.4	74.59	479.69	199.23	658.55	65.75
278	GRMZM2G131118	4	87511053	87576480	CRN_2016SY;CRN_2016SY	87583019	SNP_4_87583019;SNP_4_87583019	LOC_Os12g07190.1	CBS domain-containing protein, putative, expressed	3.04056	1.662	3.917	2.91	1.5825	0.641429	2.67167	4.69	0.92	1.9	3.84	5.51	1.99	2.63	3.78	0.68	3.7	3.55	3.29	4.85	0.91	3.34	2.3	3.75	3.1	2.96	2.01	0.95	0.92	0	0	2.92	0	1.77	0	0	0	0	0	0
279	GRMZM2G368398	4	144754197	144760416	CRD_2016SY	144756490	4:144756490			118.644	40.465	142.346	85.7817	53.2608	5.12429	199.532	99.14	33.42	122.4	128.97	154.35	97.26	174.02	173.9	89.15	47.61	130.06	134.43	148.12	73.16	107.21	147.01	189.79	85.6	59.17	40.12	52.08	30.88	24.26	47.27	33.46	40.52	22.16	112.88	129.77	95.81	14.45	11.07	14.32
280	GRMZM2G070865	4	158095257	158100338	CRA_Mean	158101759	SNP_4_158101759	LOC_Os02g46940.1	MYB family transcription factor, putative, expressed	17.8056	3.285	5.351	7.72833	1.90167	0	29.035	10.29	9.54	8.63	6.67	38.65	8.64	19.31	22.56	10.54	23.93	21.17	30.63	19.55	6.38	7.13	14.49	14.14	48.25	11.11	1.67	1.09	14.18	0	11.66	0.88	9.57	0	2.02	5.97	7.55	0	0	0
281	GRMZM2G003501	4	166858871	166860792	CRN_2015SY	166906113	SNP_4_166906113	LOC_Os02g49920.1	3-ketoacyl-CoA synthase, putative, expressed	4.70722	176.106	8.347	39.2983	1.615	0	2.92	0	0	1.03	3.81	0	13.93	5.43	8.11	1.18	0	10.52	6.99	9.04	5.09	8.32	7.44	1.5	2.34	2.03	1079.08	1189.58	0	342.2	34.89	85.4	24.02	124.2	80.56	49.26	100.92	151.9	74.34	34.3
282	GRMZM2G471733	4	166894517	166897220	CRN_2015SY	166906113	SNP_4_166906113	LOC_Os02g49950.1	spotted leaf 11, putative, expressed	86.7217	28.6625	40.906	106.457	71.5967	62.6543	71.75	138.41	213.58	80.88	158.73	25.52	135.31	85.7	58.67	56.8	162.68	61.87	111.06	62.69	26.1	31.82	52.41	39.18	59.58	145.11	25.43	30.47	68.04	3.21	67.27	5.62	105.09	13.78	8.67	16.18	76.71	2.06	0	0
283	GRMZM2G171051	4	166899508	166901779	CRN_2015SY	166906113	SNP_4_166906113	LOC_Os02g49960.1	expressed protein	45.4356	6.3505	8.315	15.3217	6.4075	0.941429	18.9433	52.37	19.95	108.24	86.12	19.36	67.82	64.32	53.14	46.09	36.76	78.34	26.1	11.06	20.65	24.34	63.84	28.35	10.99	23.72	0	0	23.43	0	15.27	0	14.14	0	9.58	27.57	13.3	0	0	0
284	GRMZM2G171060	4	166904281	166908828	CRN_2015SY	166906113	SNP_4_166906113	LOC_Os02g49980.1	ADP-ribosylation factor, putative, expressed	173.776	323.226	243.576	233.448	273.098	364.696	199.9	168.59	261.18	131.42	121.62	180.07	161.68	180.53	182.08	110.07	254.77	121.93	147.74	162.79	152.04	150.58	184.45	170.87	285.55	197.85	382.75	434.44	213.54	633.48	215.84	517.27	213.49	247.65	107.79	104.49	184.71	262.15	289.28	324.25
285	GRMZM2G055158	4	166940293	166941682	CRN_2015SY	166906113	SNP_4_166906113	LOC_Os02g49986.1	MYB family transcription factor, putative, expressed	6.83833	16.345	37.151	22.505	5.03333	0	73.2867	5.45	1.52	2.29	0	12.23	9.44	4.83	6	1.91	0.51	3.35	8.04	0.96	0	3.93	19.29	19.92	23.42	7.06	2.49	12.55	27.45	9.94	10.17	38.32	13.1	4.01	80	94.14	22.11	0	0	0
286	AC185471.3_FG005	4	166944655	166951631	CRN_2015SY	166906113	SNP_4_166906113	LOC_Os04g38880.1	dynein light chain type 1 domain containing protein, expressed	1.51889	5.504	1.253	18.2333	2.02833	0.648571	4.95333	2.13	0	7.23	8.6	4.43	0	0	1.5	0	0	0	0	0	0	0	1.47	1.98	0	2.05	0	3.93	0	0	11.06	0	2.61	0	38.73	31.1	20.6	0	0	0
287	GRMZM2G063473	4	166951520	166955204	CRN_2015SY	166906113	SNP_4_166906113	LOC_Os02g50010.1	APO, putative, expressed	8.86167	81.049	16.475	18.2233	21.0642	36.69	20.7133	10.16	2.59	10.27	11.27	8.3	7.11	10.63	11.18	4.65	6.51	8.94	7.3	10.49	8.17	7.88	8.13	12.96	12.97	34.89	157.51	198.87	12.84	99.2	120.97	270.78	43.36	78.35	73.35	60.31	56.09	26.11	31.7	66.34
288	GRMZM2G181336	4	175751779	175753487	CRN_2016SY	175786824	SNP_4_175786824	LOC_Os02g54470.1	60S ribosomal protein L35a-3, putative, expressed	837.693	447.057	684.788	430.272	1316.21	2803.15	1721.2	1062.9	2715.27	381.45	281.36	342.14	997.54	592.87	599.41	453.67	1876.07	751.79	645.06	240.75	669.09	702.19	1103.9	655.7	1007.32	1465.56	215.99	436.68	955.25	167.96	844.6	254.87	902.86	172.62	196.55	414.78	530.99	199.55	380.92	256.32
289	GRMZM2G181354	4	175758503	175761094	CRN_2016SY	175786824	SNP_4_175786824	LOC_Os06g37510.1	tetraspanin family protein, putative, expressed	40.7628	27.739	72.518	33.6217	41.0942	42.1586	57.72	40.43	34.57	36.45	46.05	57.16	18.34	29.15	34.77	23.15	53.66	35.64	44.03	41.33	43.71	39.54	41.96	52.26	61.53	13.33	12.09	11.93	63.41	5.99	26.33	4.77	31.5	9.14	15.3	41.6	60.01	43.4	54.16	0
290	GRMZM2G181358	4	175762413	175763711	CRN_2016SY	175786824	SNP_4_175786824	LOC_Os02g54370.1	hypro1, putative, expressed	8.10833	0	2.724	0	1.14	1.09143	1.17833	6.98	20.4	0	3.88	0	0	8.79	9.78	3.5	14.42	5.7	8.4	4.45	13.9	11.31	9.05	4.16	21.23	0	0	0	0	0	0	0	0	0	0	0	0	0	0	0
291	GRMZM2G181359	4	175765125	175769372	CRN_2016SY	175786824	SNP_4_175786824	LOC_Os02g54340.1	26S protease regulatory subunit 7, putative, expressed	598.865	463.767	544.813	591.58	748.734	1035.21	864.74	650.25	902.05	528.05	566.23	548.9	680.59	597.39	579.1	374.36	815.2	565	568.07	423.24	522.68	566.15	637.02	590.54	664.75	856.93	445.24	369.82	694.98	369.48	636.04	314.77	587.89	354.28	253.3	322.83	475.31	395.4	401.95	449.68
292	GRMZM2G181362	4	175769672	175780762	CRN_2016SY	175786824	SNP_4_175786824	LOC_Os02g54254.1	saccharopine dehydrogenase, putative, expressed	85.7244	83.4285	70.732	74.015	106.767	95.8957	61.0167	75.98	12.36	76.5	170.89	21.81	82.69	153.32	150.59	64.38	14.72	72.83	74.08	231.18	55.03	70.92	70.33	79.1	66.33	43.01	86.56	47.33	54.33	26.27	46.58	22.15	48.87	51.44	62.57	48.34	97.66	138.96	133.26	81.61
293	GRMZM2G041269	4	178031327	178034661	CRD_2015SY	178053727	SNP_4_178053727	LOC_Os02g53110.1	expressed protein	31.8394	76.729	24.792	47.175	26.2833	13.7786	30.045	34.46	47.12	22.24	22.1	38.65	31.87	36.22	36.36	20.65	36.35	23.22	43.45	27.2	28.1	30.9	30.66	36.62	26.94	28.96	148.02	140.93	27.83	171.26	69.38	207.95	56.08	70.08	42.54	42.78	65.67	77.67	51.45	67.1
294	GRMZM2G158811	4	178067106	178071859	CRD_2015SY	178053727	SNP_4_178053727	LOC_Os02g53070.1	HYS1, putative, expressed	19.0361	16.455	20.691	16.055	29.5558	49.3814	20.355	23.05	26.88	18.24	21.66	19.74	21.23	17.65	19.57	12.17	21.7	19.47	15.11	19.19	16.4	16.31	14.88	21.7	17.7	22.15	20.08	19.49	18.3	18.85	15.76	16.75	17.82	17.31	16.73	18.01	20.46	8.11	10.36	11.99
295	GRMZM2G158839	4	178072275	178074210	CRD_2015SY	178053727	SNP_4_178053727	LOC_Os02g53050.1	tetratricopeptide-like helical, putative, expressed	3.92278	3.233	8.951	11.2817	10.8308	9.58429	34.025	4.5	8.15	2.15	2.12	5.21	4.47	3.78	5.03	3.26	5.91	3.51	2.81	0.71	3.19	4.19	3.96	2.02	5.64	7.19	0	3.8	14.35	2.25	4.18	0	5.65	0	2.52	0	5.18	0	2.28	0
296	GRMZM2G158860	4	178081292	178092817	CRD_2015SY	178053727	SNP_4_178053727	LOC_Os03g15570.1	STE_MEKK_ste11_MAP3K.12 - STE kinases include homologs to sterile 7, sterile 11 and sterile 20 from yeast, expressed	77.5767	45.034	41.157	46.0483	31.6317	38.1757	22.6483	49.04	69.28	66.57	81.79	59.67	59.64	91.62	97.66	54.29	77.94	96.33	81.29	126.28	106.45	99.78	68.56	62.39	47.8	30.77	56.89	46.41	19.54	28.56	37.83	51.18	32.39	41.52	47.27	42.37	39.19	44.23	49.26	43.01
297	GRMZM2G301908	4	197852911	197854441	CRA_Mean	197894103	SNP_4_197894103	LOC_Os08g38270.1	fasciclin domain containing protein, expressed	3.15222	57.4275	14.118	16.81	29.0867	52.5371	104.037	9.66	7.94	6.12	9.09	1.14	6.36	3.56	2.75	1.27	4.58	0	0	0	0	0.63	2.08	1.56	0	30.1	31.57	35.84	26.55	0	106.36	1.98	102.34	0	140.37	225.71	447.73	0	0	0
298	GRMZM2G050218	4	197891498	197895200	CRA_Mean	197894103	SNP_4_197894103	LOC_Os08g38410.3	RNA recognition motif containing protein, putative, expressed	152.899	174.568	182.197	219.038	334.299	501.496	329.472	147.99	229.74	115.51	108.42	108.09	177.98	147.19	150.18	94.15	192.09	140.27	147.18	133.13	181.43	161.43	149.23	180.49	187.69	270.7	150.76	160.63	231.28	132.51	198.94	167.78	188.81	169.01	135.62	127.47	182.41	156.35	181.99	187.83
299	GRMZM2G348480	4	197900247	197906600	CRA_Mean	197894103	SNP_4_197894103	LOC_Os10g24954.1	ulp1 protease family, C-terminal catalytic domain containing protein, expressed	0.538889	0.278	1.053	0.876667	1.15333	1.68571	1.595	0.47	0.75	0.25	0.62	0.78	0.36	0.4	0.58	0.18	0.89	0.39	0.46	0.78	0.87	0.45	0.59	0.49	0.39	0.62	0.08	0	0.15	0	0.41	0.53	0.76	0.26	0	0	0.34	0.21	0	0.55
300	AC194357.3_FG003	4	197908196	197908633	CRA_Mean	197894103	SNP_4_197894103	LOC_Os05g33010.2	heat shock protein DnaJ, putative, expressed	0	0	0	0	0	0	0	0	0	0	0	0	0	0	0	0	0	0	0	0	0	0	0	0	0	0	0	0	0	0	0	0	0	0	0	0	0	0	0	0
301	GRMZM2G050307	4	197928263	197929796	CRA_Mean	197894103	SNP_4_197894103	LOC_Os02g48770.1	SAM dependent carboxyl methyltransferase, putative, expressed	2.06111	385.596	1.228	3.32333	0.05	0	0	0	0	0	0	3.71	0	3.33	1.9	4.86	0	8.24	0	0	2.25	8.4	4.1	0.31	0	0.57	50.57	63.08	0	56.95	3.92	478.05	0	3752.45	2613.93	15.33	0	16.91	6.24	209.78
302	GRMZM2G000195	4	207257353	207260355	CRA_2015SY	207276394	SNP_4_207276394	LOC_Os07g30020.1	anthranilate phosphoribosyltransferase, putative, expressed	2.84778	0	0	0	0	0	0	0	0	0.63	0	0	0	8.54	7.4	3.94	0	4.26	2.78	4.2	12.22	6.9	0	0.39	0	0	0	0	0	0	0	0	0	0	0	0	0	0	0	0
303	GRMZM2G121034	4	207582844	207587921	CRN_2016SY;CRN_2016SY	207569283	SNP_4_207569283;SNP_4_207569283	LOC_Os11g07922.1	short chain dehydrogenase/reductase protein, putative, expressed	161.295	606.196	152.238	89.7667	57.5633	14.6957	38.1	206.71	31.02	284.45	385.84	176.57	135.69	167.02	177.26	98.05	40.94	98.18	103.63	211.86	124.67	125.16	189.67	211.55	135.04	125.67	1419.44	1430.24	74.43	1423.8	572.61	1416.39	207.92	489.06	768.02	763.74	364.68	389.79	313.53	358.02
304	GRMZM2G311500	4	207618561	207618993	CRN_2016SY;CRN_2016SY	207569283	SNP_4_207569283;SNP_4_207569283	LOC_Os11g07950.1	expressed protein	30.2822	1.564	36.956	0	0	0	0	0	0	0	0	0	0	48.08	70.48	11.78	0	7.39	24.84	82.45	156.64	105.22	16.45	12.23	9.52	12.82	0	0	0	0	0	0	0	8.71	0	0	0	0	0	0
305	GRMZM2G173257	4	213743543	213744679	CRA_2017SY	213761088	SNP_4_213761088			3.64222	0.709	4.206	0	0	0	0	0	0	0	0	0	0	0	4.23	0	0	0	0	1.6	36.94	22.79	0	0	0	0	0	0	0	0	0	0	0	5.15	0	0	0	6.94	0	0
306	GRMZM2G046816	4	214907581	214912733	CRA_Mean	214931370	4:214931370	LOC_Os11g06420.1	OsFBT13 - F-box and tubby domain containing protein, expressed	156.837	155.688	114.875	155.588	171.101	285.151	247.397	179.77	163.51	186.58	181.14	335.31	187.35	150.24	135	106.31	176.03	136.58	161.58	115.35	92.81	110.67	160.79	152.81	91.23	221.8	148.29	130.36	220.76	94.24	292.56	67.11	248.06	76.42	171.7	224.18	299.35	184.32	156.45	114.02
307	GRMZM2G018707	4	226224613	226226417	CRN_2017SY	226190966	SNP_4_226190966	LOC_Os02g15500.1	plant protein of unknown function domain containing protein, expressed	12.0106	12.948	4.374	0	1.22667	0.214286	2.03167	0.84	0	8.05	6.91	0	1.82	22.77	23.41	14.44	5.34	23.17	12.72	11.9	24.62	23.65	24.37	11.08	1.1	1.86	0	1.01	0	0	0	0	0	24.32	9.7	5.31	0	3.31	21.67	20.41
308	GRMZM2G153597	4	226392997	226393413	CRA_2016SY	226394641	SNP_4_226394641	LOC_Os02g15280.1	VQ domain containing protein, putative, expressed	0.263889	2.203	0	0	0	0	0	0	0	4.75	0	0	0	0	0	0	0	0	0	0	0	0	0	0	0	0	0	0	0	0	0	0	0	0	0	0	0	0	24.1	0
309	GRMZM2G153602	4	226406851	226409892	CRA_2016SY	226394641	SNP_4_226394641	LOC_Os02g15270.1	tyrosine-protein phosphatase YVH1, putative, expressed	19.81	25.4265	35.495	18.5317	26.0108	36.1086	19.98	11.43	8.11	22.51	19.58	9.25	16.39	21.6	20.18	12.41	10.16	21.84	19.44	37.97	30.77	26.54	24.14	27.82	16.44	8.68	17.49	15.27	18.19	45.69	2.89	31.23	9.03	22.22	10.32	13.73	10.83	44.05	44.68	35.16
310	GRMZM2G020196	4	229159456	229162354	CRA_2017SY	229202306	SNP_4_229202306	LOC_Os02g13960.1	spotted leaf 11, putative, expressed	49.3022	71.795	49.302	39.6217	29.075	26.67	28.45	47.83	26.93	57.78	89.12	43.05	44.11	46.11	47.1	31.07	25.88	49.8	51.62	73.72	49.86	53.9	61.67	62.38	25.51	21.04	71.51	59.31	15.41	50.54	15.91	86.11	10.24	100.15	127.72	102.81	33.08	119.33	92.02	94.77
311	GRMZM2G019358	4	229164322	229170448	CRA_2017SY	229202306	SNP_4_229202306	LOC_Os02g13970.1	Complex I intermediate-associated protein 30 domain containing protein, putative, expressed	26.7772	1343.64	265.279	128.783	40.5983	23.4371	17.5167	30.75	3.44	41.46	79.98	3.97	11.02	13.16	15.28	9.08	3.6	9.33	10.68	29.29	21.9	21.36	30.7	45.73	101.26	29.53	2522.84	1937.88	94.57	2557.16	238.86	3774.56	89.4	1880.77	910.9	604	108.61	1569.49	1321.25	1957.16
312	GRMZM2G018770	4	229180838	229184206	CRA_2017SY	229202306	SNP_4_229202306	LOC_Os02g14059.1	ribosomal protein L5, putative, expressed	650.049	359.967	516.441	363.402	852.076	1765.56	969.797	870.95	1776.24	394.04	316.78	319.61	889.96	444.59	389.05	323.6	1522.62	540.53	573.18	188.67	446.89	463.66	844.51	518.98	877.02	1226.97	414.3	469.67	714.22	324.31	706.3	274.55	540.42	148.55	207.12	235.28	259.72	169.93	157.05	207.46
313	GRMZM2G121790	4	229199657	229204882	CRA_2017SY	229202306	SNP_4_229202306	LOC_Os02g14130.1	CGMC_GSK.4 - CGMC includes CDA, MAPK, GSK3, and CLKC kinases, expressed	206.143	192.668	212.716	219.358	242.64	300.269	183.618	197.47	230.4	182.09	237.43	198.59	219.05	173.41	204.4	122.37	247.64	175.15	196.75	226.12	202.54	199.68	229.81	237.51	230.16	242.55	221.1	171.22	239.16	195.01	216.74	132.01	191.04	155.92	131.75	143.77	178.12	212.89	208	192.63
314	GRMZM2G012393	4	233606522	233609685	CRN_2017SY	233658705	SNP_4_233658705	LOC_Os02g10600.1	OsFBA1 - F-box and FBA domain containing protein, expressed	45.4039	47.09	87.859	79.8667	111.792	173.463	74.0567	33.31	32.3	36.93	31.91	41.53	31.74	44.31	49.98	27.16	37.79	37.01	41.41	47.22	66.87	62.91	60.91	76.03	57.95	45.48	27.52	23.97	61.16	28.2	33.07	25.94	54.05	28.28	33.71	35.81	44.83	67.1	59.8	44.89
315	GRMZM2G012340	4	233623881	233625609	CRN_2017SY	233658705	SNP_4_233658705	LOC_Os02g10590.1	peptidyl-prolyl cis-trans isomerase, FKBP-type, putative, expressed	0	75.2525	0.874	3.52667	0.2475	0	0	0	0	0	0	0	0	0	0	0	0	0	0	0	0	0	0	0	0	6.4	202.57	179.04	0	221.72	40.28	196.42	21.42	46.96	76.32	85.65	37.96	37.63	51.39	46.77
316	GRMZM2G311914	4	233625874	233629139	CRN_2017SY	233658705	SNP_4_233658705	LOC_Os02g10540.1	ribosomal protein L7/L12 C-terminal domain containing protein, expressed	72.805	52.3345	120.959	96.8617	146.198	160.986	201.242	71.3	130.42	41.7	23.18	43.48	108.27	49.4	47.98	33.71	122.82	55.24	57.23	30.4	82.15	78.02	90.7	96.99	147.5	148.33	17.82	34.2	133.99	34.33	77.77	44.03	105.94	37.16	29.64	41.66	56.64	20.13	22.43	43.42
317	GRMZM2G311905	4	233626797	233629213	CRN_2017SY	233658705	SNP_4_233658705	LOC_Os02g10530.1	expressed protein	0.258889	0.756	0.114	71.745	0.211667	0.338571	0.115	0.22	0.14	2.34	0.55	0.14	0.06	0.08	0.15	0.05	0.03	0.22	0.2	0.15	0.04	0.07	0.03	0.09	0.1	1.12	0.2	0.21	1.27	1.47	0.1	0.11	0.14	1.08	0.74	0.6	0.25	1.91	0.06	1.31
318	GRMZM2G049839	4	233658368	233664640	CRN_2017SY	233658705	SNP_4_233658705	LOC_Os02g10510.1	Ubiquitin family domain containing protein, expressed	336.306	256.995	180.343	235.975	186.146	241.78	131.055	363.23	541.61	286.78	356.41	280.05	423.24	318.22	352.35	235.95	468.94	321.55	336.22	268	306.36	299.03	312.41	284.92	298.23	430.42	288.6	281.44	223.76	276.35	353.1	227.25	338.71	258.4	181.88	159.21	199.15	221.3	205.88	260.82
319	GRMZM2G405022	4	235330065	235330502	CRN_2016SY;CRN_2016SY;CRN_Mean;CRN_2016SY	235330942	4:235330942;SNP_4_235330942;SNP_4_235330942;SNP_4_235330942	LOC_Os06g44420.1	GDU1, putative, expressed	0	0	0	0	0	0	0	0	0	0	0	0	0	0	0	0	0	0	0	0	0	0	0	0	0	0	0	0	0	0	0	0	0	0	0	0	0	0	0	0
320	GRMZM2G363474	4	235360158	235364081	CRN_2016SY;CRN_2016SY;CRN_Mean;CRN_2016SY	235330942	4:235330942;SNP_4_235330942;SNP_4_235330942;SNP_4_235330942	LOC_Os02g08190.1	CYPRO4, putative, expressed	37.1167	30.3535	61.694	96.025	44.2108	23.0514	134.8	38.5	68.32	32.2	15.6	34.08	65.91	36.2	34.47	31.86	62.13	73.17	34.29	9.09	20.29	23.55	38.7	24.47	25.27	177.66	1.91	9.29	164.33	4.54	43.81	1.87	136.51	0	1.54	3.32	17.75	0	4.43	0
321	GRMZM2G062600	4	235365038	235366239	CRN_2016SY;CRN_2016SY;CRN_Mean;CRN_2016SY	235330942	4:235330942;SNP_4_235330942;SNP_4_235330942;SNP_4_235330942	LOC_Os01g71340.1	glycosyl hydrolases family 17, putative, expressed	6.75222	6.5085	6.841	0.476667	2.42583	0	2.97667	3.55	0	10.38	11.64	0	0	8.01	9.76	1.69	0	5.35	17.33	31.48	4.9	6.46	4.71	1.43	4.85	12.79	0	4.35	0	5.73	0	0	0	8.38	3.53	0	0	0	21.7	0
322	GRMZM2G363520	4	235367805	235369289	CRN_2016SY;CRN_2016SY;CRN_Mean;CRN_2016SY	235330942	4:235330942;SNP_4_235330942;SNP_4_235330942;SNP_4_235330942	LOC_Os02g08200.1	zinc finger, C3HC4 type domain containing protein, expressed	3.91111	0.278	4.754	5.56833	5.99833	0	1.05833	3.52	0	4.96	8.95	8.05	0	0	1.51	1.17	0	1.79	2.11	4.28	1.39	0.74	12.15	10.72	9.06	0	0	0	0	3.53	0	2.03	0	0	0	0	0	0	0	0
323	GRMZM2G062683	4	235374121	235381738	CRN_2016SY;CRN_2016SY;CRN_Mean;CRN_2016SY	235330942	4:235330942;SNP_4_235330942;SNP_4_235330942;SNP_4_235330942	LOC_Os02g08240.1	STE_PAK_Ste20_STLK.1 - STE kinases include homologs to sterile 7, sterile 11 and sterile 20 from yeast, expressed	26.4256	25.8095	23.328	65.67	33.6242	38.8786	61.5733	24.73	25.41	17.67	12.88	27.44	28.63	17.15	20.56	9.1	27.11	12.1	20.01	14.67	25.2	25.02	36.74	45.43	85.81	40.09	7.3	15.66	35.26	9.88	93.34	16.58	83.42	11.66	23.81	29.77	75.5	15.55	8.39	6.15
324	GRMZM5G851807	4	237933907	237936944	CRD_2016SY;CRD_Mean	237985655	4:237985655;SNP_4_237985655	LOC_Os02g05880.1	RNA polymerase Rpb1, domain 2 family protein, expressed	41.4911	36.5075	60.327	116.68	116.573	150.453	125.788	34.49	35.53	44.85	39.78	36.59	36.15	44.69	42.79	25.35	35.91	41.59	34.96	46.16	45.38	42.16	55.66	51.2	53.6	61.66	23.97	20.51	94.73	13.78	30.25	40.08	67.63	35.73	36.34	32.93	50.49	22.39	35.32	29.25
325	GRMZM2G153899	4	237937204	237942913	CRD_2016SY;CRD_Mean	237985655	4:237985655;SNP_4_237985655	LOC_Os02g05870.1	expressed protein	46.2072	26.5455	56.958	43.93	64.1542	112.731	58.44	49.14	86.03	43.82	23.56	43.72	53.59	37.91	41.62	26.69	70	49.62	39.2	30.6	48.92	47.15	58.12	42.7	39.34	72.88	15.07	22.95	74.48	5.15	50.36	12.45	57.53	13.71	31.1	23.57	28.65	9.78	13.07	15.45
326	GRMZM2G058004	4	237983903	237987548	CRD_2016SY;CRD_Mean	237985655	4:237985655;SNP_4_237985655	LOC_Os12g44140.1	expressed protein	17.6756	36.608	31.27	33.56	42.81	55.4857	41.23	15.4	18.17	13.54	15.48	18.27	22.28	15.98	19.29	11.45	17.44	15.69	15.5	16.7	19.24	18.67	19.89	21.85	23.32	33.48	43.77	45.82	31.5	56.74	38.47	58.38	39.23	27.34	34.19	36.82	31.28	21.82	12.95	47.98
327	GRMZM2G166162	4	237991959	237997623	CRD_2016SY;CRD_Mean	237985655	4:237985655;SNP_4_237985655	LOC_Os02g05840.1	VIL2 protein, putative, expressed	78.33	58.1765	68.367	200.227	251.873	500.08	213.02	73.8	87.44	67.3	104.69	66.46	72.32	88.73	87.02	52.59	91.71	75.38	101.76	116.18	64.51	71.13	52.46	79.57	56.89	95.09	61.26	56.15	79.33	43.93	94.19	52.9	138.88	38.56	44.24	49.65	107.54	35.06	32.62	31.1
328	GRMZM2G467703	4	237998011	238001698	CRD_2016SY;CRD_Mean	237985655	4:237985655;SNP_4_237985655	LOC_Os02g05820.1	protein kinase domain containing protein, expressed	0.676111	0.0925	0.062	123.483	0	0	0	0	0	0.66	0	1.44	3.82	1.64	0.8	0	0	1.63	0	0.73	0	0.81	0.64	0	0	0.8	0	0	0	0	0	0	0	0	0	0	0	0	0	0
329	GRMZM2G467682	4	238028638	238030928	CRD_2016SY;CRD_Mean	237985655	4:237985655;SNP_4_237985655	LOC_Os06g47860.1	expressed protein	56.6567	41.1945	16.638	19.2317	8.26667	0.732857	1.30333	57.07	19.83	71.73	132.54	47.66	41.21	63.14	76.6	43.33	23.17	74.18	51.87	92.7	57.82	52.21	41.79	46.7	26.27	11.15	31.93	22.69	2.66	32.48	2.36	30.86	0.87	36.65	7.46	9.23	4.81	58.11	80.74	49.24
330	GRMZM2G166147	4	238032253	238033263	CRD_2016SY;CRD_Mean	237985655	4:237985655;SNP_4_237985655	LOC_Os02g05700.1	OsFBO8 - F-box and other domain containing protein, expressed	0.587778	0.7965	0	0	0	0	0	0	0	0	0	0	9.62	0	0	0	0	0	0	0	0	0	0	0.96	0	15.93	0	0	0	0	0	0	0	0	0	0	0	0	0	0
331	GRMZM2G155370	4	238141556	238145187	CRD_Mean	238143069	4:238143069	LOC_Os02g05470.1	CCT motif family protein, expressed	0.586667	119.059	12.311	5.82167	0	0	0	0	0	0	0	0	0	0	0	0	0	0	0	0	0	0	0	0.76	9.8	6.76	223.22	491.4	3.03	437.54	105.87	336.39	31.28	56.78	189.32	199.89	100.13	18.03	14.51	21.44
332	GRMZM2G155384	4	238153955	238162605	CRD_Mean	238143069	4:238143069	LOC_Os02g05340.1	proteasome/cyclosome repeat containing protein, expressed	336.287	282.814	326.721	335.895	380.807	455.23	462.053	398.25	653.3	221.05	292.98	283.6	441.84	272.51	272.12	201.2	619.92	282.48	304.22	181.97	242.94	272.3	270.05	298.54	543.89	633.95	234.56	222.49	447.4	275.62	404.69	209.9	394.86	184.02	151.92	165.6	253.28	227.23	260.95	225.8
333	GRMZM2G065494	4	238310811	238319374	CRD_2016SY	238323089	4:238323089	LOC_Os02g04710.1	cycloartenol synthase, putative, expressed	173.437	214.938	233.177	293.868	245.513	95.95	272.92	150.45	197.87	125.76	178.35	102.2	253.88	124.17	119.13	86.51	241.6	113.8	139.16	108.83	133.61	165.61	217.24	352.68	311.02	282.42	461.82	291.95	212.36	307.06	324.12	221.3	148.68	131.12	245.75	310.73	176.1	123.91	110.1	129.91
334	GRMZM2G065451	4	238318275	238321628	CRD_2016SY	238323089	SNP_4_238323089	LOC_Os02g04680.2	OsSPL3 - SBP-box gene family member, expressed	52.7172	26.6245	76.615	31.5483	29.9867	15.0271	21.3817	32.08	57.2	34.51	35.24	31.1	20.17	19.39	21.43	11.82	57.13	24.68	19.47	22.14	44.73	53.08	109.01	92.42	263.31	18.77	11.14	11.52	153.24	16.94	55.1	7.63	50.34	15.41	23.48	28.47	38.98	15.83	28	6.78
335	GRMZM2G121663	5	2105653	2109212	CRA_Mean	2105009	SNP_5_2105009	LOC_Os01g63354.1	ELM2 domain containing protein, putative, expressed	1.27278	0.1495	0.605	7.45833	0.595	1.86857	2.525	1.73	5.8	1.32	0.57	1.22	1.85	1.36	0.97	0	2.53	1.53	1.7	0	0.63	0.27	0.98	0.45	0	2.31	0	0	0	0	0	0	0.68	0	0	0	0	0	0	0
336	GRMZM2G121715	5	2109670	2112066	CRA_Mean	2105009	SNP_5_2105009	LOC_Os03g61060.2	protein kinase domain containing protein, expressed	42.9339	57.229	70.717	37.7	28.4942	8.84143	23.4533	29.2	14.28	43.67	48.78	11.01	33.86	58	54.43	30.49	31.84	59.53	43.89	70.88	57.93	51.41	51.97	60.62	21.02	32.57	17.09	24.5	20.32	22.21	7.59	11.57	7.42	82.68	87.65	53.54	21.08	120.37	115.17	52.71
337	GRMZM2G121743	5	2112293	2114786	CRA_Mean	2105009	SNP_5_2105009	LOC_Os03g61019.1	mitochondrial import inner membrane translocase subunit Tim, putative, expressed	212.826	161.241	234.321	189.237	207.913	232.834	450.1	256.5	486.79	177.02	122.1	161.5	239.26	168.48	163.78	118.41	424.84	160.3	174.63	106.66	174.89	174.64	251.99	181.39	287.68	368.31	126.46	159.2	344.27	144.17	262.14	143.3	216.25	79.09	65.06	100.63	137.71	118.99	118.69	114.72
338	GRMZM2G121826	5	2116106	2121486	CRA_Mean	2105009	SNP_5_2105009	LOC_Os03g61010.1	protein kinase family protein, putative, expressed	75.0661	35.93	52.914	110.293	103.961	98.2586	92.7883	93.17	193.47	32.41	32.62	62.48	145.31	56.4	45.39	42.19	181.2	43.36	70.8	14.51	46.02	43.9	67.22	57.07	123.67	172.29	6.64	24.78	156.42	1.86	118.7	0.53	105.52	0	29	29.18	73.68	0	0	0
339	GRMZM2G121840	5	2126865	2129228	CRA_Mean	2105009	SNP_5_2105009	LOC_Os03g60920.1	Methyltransferase small domain containing protein, expressed	123.422	92.7205	96.789	112.262	133.802	127.719	109.857	112.83	129.87	113.72	112.31	123.29	73.45	141.96	162.1	82.44	127.58	104.93	131.19	178.62	146.18	122.22	128.58	146.61	83.72	87.56	116.79	96.9	94.99	75.65	95.58	80.04	91.3	86.11	90.13	84.3	95.19	91.94	115.49	94.27
340	GRMZM2G121841	5	2132048	2133231	CRA_Mean	2105009	SNP_5_2105009	LOC_Os03g60910.1	PPR repeat domain containing protein, putative, expressed	0	0	0	0	0	0	0	0	0	0	0	0	0	0	0	0	0	0	0	0	0	0	0	0	0	0	0	0	0	0	0	0	0	0	0	0	0	0	0	0
341	GRMZM2G121843	5	2137959	2140703	CRA_Mean	2105009	SNP_5_2105009	LOC_Os03g32150.1	expressed protein	37.8906	32.015	49.348	57.2733	52.7783	69.0429	116.778	36.61	38.56	49.94	17.48	41.93	70.73	38.04	29.61	28.73	37.49	32.57	21.45	12.88	35.22	26.21	60.72	43.93	59.93	108.58	26.93	24.56	69.49	25.68	47.42	17.38	66.5	16.01	35.49	69.81	73.54	24.37	15.84	0
342	GRMZM2G121851	5	2141098	2144903	CRA_Mean	2105009	SNP_5_2105009	LOC_Os03g32160.1	calmodulin binding protein, putative, expressed	54.755	52.9825	52.002	50.4183	61.3642	77.2886	51.2633	35.63	26.47	50.38	86.85	44.76	54.45	48.45	52.72	28	52.37	58.73	60.2	106.04	61.79	63.57	41.71	54.4	59.07	55.62	53.19	35.93	42.26	56.75	25.07	71.33	28.58	78.2	35.07	30.15	25.9	79.47	55.4	77.36
343	GRMZM2G420823	5	2146899	2152100	CRA_Mean	2105009	SNP_5_2105009	LOC_Os03g60880.3	nucleobase-ascorbate transporter, putative, expressed	33.1167	8.6105	44.23	59.69	7.40583	0.625714	56.5917	48.37	112.75	6.53	5.81	28.66	56.36	24.74	17.1	17.17	132.25	25.34	29.13	2.04	7.3	8.71	28.82	15.31	29.71	61.77	0	2.19	65.39	0	9.84	0	29.53	0	0	0	3.49	0	0	0
344	AC210013.4_FG003	5	3478271	3483100	CRA_Mean	3515241	SNP_5_3515241	LOC_Os03g59290.1	C-methyltransferase, putative, expressed	6.88111	44.9395	13.636	12.6817	23.5575	73.0014	70.565	6.17	16.72	0.58	3.74	4.29	4.4	10.75	8.3	8.24	18.29	8.24	3.09	2.84	8.31	8.7	3.72	1.65	5.83	854.24	2.95	0	17.6	0	1.75	0	2.66	0	0	0	0	0	0	0
345	AC210013.4_FG002	5	3486961	3487902	CRA_Mean	3515241	SNP_5_3515241	LOC_Os03g59280.1	plastocyanin-like domain containing protein, putative, expressed	110.311	47.0345	38.744	15.2517	3.365	2.20429	0	68.1	13.21	108.6	2.35	376.03	63.9	120.12	122.23	86.19	12.66	149.82	241.66	80.03	56.17	80.8	156.1	196.13	51.49	51.95	0	36.78	90.77	0	158.75	0	85.63	0	0	50.99	465.82	0	0	0
346	GRMZM5G836683	5	3501432	3505909	CRA_Mean	3515241	SNP_5_3515241	LOC_Os03g59290.1	C-methyltransferase, putative, expressed	10.5467	30.085	119.649	48.4133	63.1183	3.82	27.4667	6.25	6.44	8.26	4.98	7.02	7.7	13.84	12.58	7.43	8.48	12.76	6.47	11.67	14.06	10.4	20.17	5.97	25.36	88.05	0.8	0	439.88	0	2.17	0	6.02	0	0	0	0	0	5.53	0
347	GRMZM2G024150	5	3530018	3531150	CRA_Mean	3515241	SNP_5_3515241	LOC_Os08g44680.1	photosystem I reaction center subunit II, chloroplast precursor, putative, expressed	15.4322	3036.78	190.949	110.772	8.70917	0.591429	0.275	1.49	0	2.14	0	9.09	2.26	9.14	11.98	5.31	0.51	10.28	9.58	18.21	9.92	5.77	6.3	35.36	140.44	25.27	9849.53	5019.05	23.58	6893.64	649.83	13142.1	128.32	6032.52	3870.27	1893.92	288.92	2214.75	1942.7	2409.96
348	GRMZM2G024395	5	3533167	3535732	CRA_Mean	3515241	SNP_5_3515241	LOC_Os03g59250.1	expressed protein	54.7256	63.873	59.245	66.945	73.6108	104.219	78.005	44.44	57.81	58.73	52	46.3	68.86	53.64	57.71	32.83	58.37	52.43	52.01	68.75	49.16	51.11	59.37	54.53	67.01	80.44	66.53	71.8	59.16	93.76	68.48	92.33	61.4	38.59	73.89	63.75	65.98	54.78	39.49	55.09
349	GRMZM2G024657	5	3535893	3539529	CRA_Mean	3515241	SNP_5_3515241	LOC_Os04g52850.1	OTU-like cysteine protease family protein, putative, expressed	62.3733	51.113	52.7	45.8983	45.2958	67.07	61.0083	77.07	106.18	57.53	55.33	59.02	74.76	49.83	53.94	33.18	86.29	63.05	52.13	47.38	62.07	57.45	73.47	53.88	60.16	84.86	67.69	64.98	60.68	69.14	70.41	60.89	66.57	29.87	34.12	39.64	46.76	32.31	47.58	55.12
350	GRMZM2G318346	5	3540056	3545275	CRA_Mean	3515241	SNP_5_3515241	LOC_Os07g10500.1	cytochrome b-c1 complex subunit 7, putative, expressed	669.448	249.084	355.409	365.798	285.968	281.549	425.708	902.94	1194.92	814.08	817.83	918.32	878.83	511.11	440.07	408.52	1106.9	536.54	541.41	293.42	370.87	438.7	734.74	582.06	558.8	673.87	279.52	236.03	377.71	268.88	433.73	218.61	353.85	127.24	307.84	299.71	239.55	127.03	144.16	136.16
351	GRMZM2G025164	5	3547692	3550017	CRA_Mean	3515241	SNP_5_3515241	LOC_Os03g59200.1	expressed protein	72.8167	50.8205	50.816	63.525	61.1842	44.4029	49.69	111.23	73.78	114.97	127.67	109.12	66.26	67.56	73.32	55.3	66.72	47.31	42.19	28.56	43.97	56.58	91.36	95.33	39.47	57.67	69.79	57.38	70.1	55.37	84.41	40.5	85.94	28.11	113.02	148.42	101.06	9.96	15.84	22.69
352	GRMZM2G025248	5	3553168	3555891	CRA_Mean	3515241	SNP_5_3515241	LOC_Os03g59170.1	OsAPRL5 adenosine 5\'-phosphosulfate reductase-like OsAPRL5, expressed	100.839	62.876	72.686	93.9433	126.304	235.699	78.4533	83.55	63.28	124.86	106.2	169.51	100.07	89.78	100.53	60	79.8	88.22	96.77	126.91	125.32	109.97	114.15	113.94	62.25	81.34	87.96	89.41	85.13	67.56	79.44	86.47	55.86	50.99	50.77	48.55	48.12	43.93	24.86	69.12
353	GRMZM2G072315	5	6874095	6876011	CRA_2016SY	6923945	5:6923945	LOC_Os03g54890.1	ribosomal protein L13, putative, expressed	1036.66	520.85	818.117	587.818	1314.44	2872.63	1402.86	1440.44	2733.29	730.88	559.99	533.79	1297.07	802.97	749.4	607.88	1977.81	975.75	928.54	285.64	692.83	813.67	1521.61	888.05	1120.32	1937.96	403.58	591.39	1274.09	326.27	1025.96	353.73	1084.42	197.37	281.14	275.39	383.29	140.63	263.66	327.99
354	GRMZM2G072231	5	6879260	6882723	CRA_2016SY	6923945	5:6923945	LOC_Os07g01850.1	NLI interacting factor-like phosphatase, putative, expressed	97.1767	102.307	96.308	104.465	135.232	139.85	142.647	99.3	157.87	79.72	74.2	107.64	115.41	84.12	87.35	59.33	146.06	84.17	91.51	72.69	73.41	75.41	81.54	87.62	171.83	142	107.5	112.41	100.78	219.72	76.58	136.27	58.76	87.57	65.46	52.89	44.28	106.09	84.5	94.4
355	GRMZM2G072071	5	6885431	6891243	CRA_2016SY	6923945	SNP_5_6923945	LOC_Os03g54790.1	ABC transporter, ATP-binding protein, putative, expressed	130.433	358.128	91.002	108.918	93.6483	41.3214	107.035	74.42	35.5	95.65	103.96	76.08	65.21	146.9	172.94	89.65	26.85	121.91	178.49	237.09	210.16	266.6	169.98	197.42	78.98	73.67	451.55	369.6	60.65	640.95	119.8	584.59	65.72	431.25	179.61	118.16	96.3	579.9	507.17	540.69
356	GRMZM2G371942	5	6904013	6905390	CRA_2016SY	6923945	5:6923945			19.4061	7.8055	10.981	28.9167	45.7067	89.1257	34.1667	21.75	38.96	13.24	10.5	10.13	9.69	17.36	20.29	12.32	36.07	19.51	17.16	5.25	25.34	28.78	28.95	19.02	14.99	16.99	7.23	6.9	16.88	0	19.48	9.77	37.55	2.42	7.19	13.26	16.02	0	0	0
357	GRMZM2G071970	5	6914003	6917632	CRA_2016SY	6923945	5:6923945	LOC_Os05g32110.1	COBRA, putative, expressed	245.151	156.305	211.397	241.477	259.485	186.219	170.245	303.75	342.69	258.04	330.54	290.36	311.19	204.93	202.76	152.52	262.34	138.33	208.54	144.28	160.06	201.57	289.56	337.69	273.56	291.31	177.14	231.35	168.79	101.84	286.77	176.58	202.24	115.27	294.72	325.12	312.62	71.11	60.74	84.35
358	GRMZM2G071745	5	6920391	6922073	CRA_2016SY	6923945	5:6923945	LOC_Os05g01820.1	cytochrome b5-like Heme/Steroid binding domain containing protein, expressed	222.161	187.466	147.399	147.013	150.898	219.394	136.482	265.4	327.74	270.99	271.72	290.85	206.68	174.39	187.48	113.95	314.01	203.16	188.54	127.05	185.94	196.48	286.44	213.01	175.06	211.82	236.15	261.68	151.15	245.94	218.6	332.97	171.42	122.03	186.73	162.98	174.29	121.78	158.81	158.5
359	GRMZM2G071620	5	6925447	6932461	CRA_2016SY	6923945	5:6923945	LOC_Os03g54170.1	OsMADS34 - MADS-box family gene with MIKCc type-box, expressed	0.605556	1.008	21.264	176.957	105.991	1.00286	37.875	0	0	0	0	0	0	0	0	0	0	0	0	0	0	0	0.87	5.03	5	0	0	0	0	0	0	0	0	0	0	0	13.39	0	0	0
360	GRMZM2G051403	5	7706026	7707915	CRD_2016SY	7692310	SNP_5_7692310	LOC_Os05g45030.1	calcium homeostasis regulator CHoR1, putative, expressed	3.07167	283	38.431	14.9533	22.7567	55.1986	4.60333	0	0	0.79	0.89	0	2.27	0	1.69	0	0.27	0	0	0.84	4.9	1.95	5.62	12.04	24.03	73.26	583.46	600.48	8.57	639.2	319.22	519.75	80.21	169.33	519.34	450.39	193.65	150.22	152.31	192.19
361	GRMZM2G051270	5	7710238	7714213	CRD_2016SY	7692310	SNP_5_7692310	LOC_Os03g53230.1	bifunctional 3-phosphoadenosine 5-phosphosulfate synthetase, putative, expressed	833.168	297.915	749.391	161.565	190.453	244.546	265.783	362.7	38.49	776.67	617.41	516.18	493.76	1060.54	1243.58	536.44	319.47	1098.83	968.97	1627.58	1895.15	1387.01	795.21	903.72	355.32	260.47	98.98	158.67	284.02	527.99	189.86	294.12	92.08	431.73	94.43	47.26	50.53	542.24	333.7	624.05
362	GRMZM2G350857	5	7715821	7720338	CRD_2016SY	7692310	SNP_5_7692310	LOC_Os02g37870.1	Brix domain containing protein, putative, expressed	0	0	0	0	0	0	0	0	0	0	0	0	0	0	0	0	0	0	0	0	0	0	0	0	0	0	0	0	0	0	0	0	0	0	0	0	0	0	0	0
363	GRMZM2G350850	5	7725158	7726564	CRD_2016SY	7692310	SNP_5_7692310	LOC_Os01g72420.1	C2 domain containing protein, putative, expressed	0	0.142	0	0	0	0	0	0	0	0	0	0	0	0	0	0	0	0	0	0	0	0	0	0	0	0	0	0	0	0	0	0	0	0	0	0	0	0	0	0
364	GRMZM2G350844	5	7727932	7729091	CRD_2016SY	7692310	SNP_5_7692310	LOC_Os12g23930.1	protein kinase domain containing protein, expressed	0	0	0	1.655	0	0	0	0	0	0	0	0	0	0	0	0	0	0	0	0	0	0	0	0	0	0	0	0	0	0	0	0	0	0	0	0	0	0	0	0
365	GRMZM2G050833	5	7732517	7734614	CRD_2016SY	7692310	SNP_5_7692310	LOC_Os03g53190.1	Core histone H2A/H2B/H3/H4 domain containing protein, putative, expressed	357.428	446.193	266.518	815.487	493.971	689.994	675.282	333.76	465.51	368.65	254.4	361.36	296.09	410.58	440.14	265.28	496.57	431.98	422.11	324.53	345.44	325.44	352.07	286.83	252.97	624.54	262.46	399.19	548.74	195.14	485.12	832.76	881.3	483.89	331.95	350.47	460.07	194.77	311.73	434.52
366	GRMZM2G001724	5	19911336	19915551	CRA_2017SY	19963657	SNP_5_19963657	LOC_Os03g38730.1	peroxisomal membrane protein, putative, expressed	39.7289	2672.56	130.595	82.6633	44.59	34.9143	40.255	32.88	40.68	25.52	36.46	22.57	33.02	40.03	49.63	33.19	40.88	29.63	37.48	49.19	53.94	49.26	40.76	51.51	48.49	51.78	3509.82	1324.37	43.25	3141.15	106.32	3098.4	79.93	6788.88	167.25	76.09	59.74	5295.93	4946.17	6992.8
367	GRMZM2G301405	5	19916753	19927967	CRA_2017SY	19963657	SNP_5_19963657	LOC_Os09g14610.1	DCL2, putative, expressed	19.7133	29.942	31.098	37.3483	19.6275	7.69143	37.455	18.09	21.22	23.85	8.58	52.5	21.28	16.39	18.5	12.17	18.88	21.33	15.18	11.08	13.6	16.86	23.77	20.34	21.22	30.9	27.97	38.4	38.48	30.41	48.2	49.31	65.32	22.51	35.67	34.86	63.34	18.34	7.18	16.25
368	GRMZM2G001631	5	19939913	19945652	CRA_2017SY	19963657	SNP_5_19963657	LOC_Os09g14610.1	DCL2, putative, expressed	40.6456	23.317	53.462	24.5667	39.5067	35.8871	10.5933	19.67	10.65	28.69	22.87	49.6	27.13	33.47	40.79	20.84	17.38	49.15	38.78	59.26	68.07	65.6	71.91	64.93	42.83	22.14	8.11	7.54	37.41	5.5	11.9	7.26	9.19	27.61	20.97	16.31	17.33	41.34	45.48	27.84
369	GRMZM2G153627	5	19959232	19960893	CRA_2017SY	19963657	SNP_5_19963657	LOC_Os09g14610.1	DCL2, putative, expressed	24.8383	12.3355	37.146	18.735	26.0717	21.0343	5.74333	14.11	7.97	9.44	15.65	38.67	20.34	14.48	23.68	13.49	15.62	34.81	26.86	36.97	41.24	40.22	24.34	37.02	32.18	18.89	2.68	5.34	30.84	2.99	6.14	1.72	6.55	4.66	6.23	0	12.41	28.66	21.39	13.3
370	GRMZM2G041048	5	20989766	20993954	CRD_Mean	21000370	SNP_5_21000370	LOC_Os03g36439.1	F-box domain containing protein, expressed	56.8822	41.147	36.629	52.875	42.4875	49.9114	37.87	56.49	42.57	68.73	89.92	36.29	38.61	82.81	84.2	42.2	48	51.71	59.53	77.03	52.72	51.98	55.9	55.49	29.7	31.52	37.91	37.35	31.7	37.44	33.68	53.43	43.55	51.19	56.46	45.35	35.95	39.36	30.29	66.24
371	GRMZM2G337330	5	20996292	20997250	CRD_Mean	21000370	SNP_5_21000370	LOC_Os03g36080.1	expressed protein	32.4317	127.466	13.267	86.9033	45.76	4.62	12.7467	16.14	0	30.3	38.98	18.75	8.63	43.18	49.87	18.62	10.3	45.33	43.4	115.15	46.58	42.45	16.31	27.68	12.1	42.13	478.53	189.3	0	233.73	29.04	112.57	10.77	222.07	200.04	77.95	23.18	158.56	57.48	118.18
372	GRMZM2G024054	5	21005810	21011591	CRD_Mean	21000370	SNP_5_21000370	LOC_Os07g49530.1	MYB family transcription factor, putative, expressed	38.8656	52.2065	53.395	44.1417	46.3092	82.3643	48.565	35.28	33.13	36.17	40.25	45.65	40.53	38.27	36.44	25.5	39.78	37.26	33.87	38.37	41.64	45.2	47.53	41.55	43.16	43.93	56.41	35.8	51.68	34.56	34.71	56.84	38.55	57.64	68.53	50.79	49.53	78.14	54.41	59.68
373	GRMZM2G023982	5	21012110	21025199	CRD_Mean	21000370	SNP_5_21000370	ChrUn.fgenesh.mRNA.43	hypothetical protein	26.4611	1.752	5.914	0.468333	0.181667	0	0.183333	28.43	0	36.69	46.46	6.98	28.53	51.49	44.97	20.1	7.07	14.31	20.75	47.86	19.06	21.21	27.28	46.78	8.33	3.41	0	0	0	0	0	0	0.46	0	3.41	12.94	12.6	0	2.22	0
374	AC209332.3_FG011	5	21048367	21051226	CRD_Mean	21000370	SNP_5_21000370	LOC_Os01g52430.1	hAT dimerisation domain-containing protein, putative, expressed	0.148333	0.3645	0.369	0.25	0.0308333	0.0314286	0.111667	0	0	0	0.23	0.15	0	0.1	0	0	0.23	0.01	0.18	0.42	0.42	0.1	0.16	0.33	0.34	0.16	0.29	0.33	0	0	0.2	0	0	0	0	0	0	0	0	0
375	GRMZM2G146041	5	21048673	21067870	CRD_Mean	21000370	SNP_5_21000370	ChrUn.fgenesh.mRNA.85	expressed protein	28.5056	41.5155	40.018	42.9783	31.2025	34.2957	29.5167	28.7	20.49	26.79	39	32.31	25.4	29.35	31	17.3	23.74	27.58	30.44	36.59	30.44	27.77	31.2	33.98	21.02	30.31	65.21	41.89	28.36	46.24	30	64.93	36.88	53.35	33.61	37.11	35.4	49.6	40.25	46.14
376	GRMZM2G060349	5	23357125	23387136	CRD_Mean;CRD_2016SY	23384758	SNP_5_23384758;SNP_5_23384783	LOC_Os10g36530.1	mutS domain V family protein, expressed	3.14333	134.32	10.401	11.8	6.96667	8.12	9.855	2.44	2.05	3.29	2.53	2.39	3.99	1.96	1.92	1.07	1.11	1.55	1.33	3.39	4.87	4.67	4.78	5.97	7.27	13.19	326.23	170.9	10.45	291.68	22.29	308.06	11.72	235.98	39.32	23.94	10.64	177.56	160.72	311.32
377	GRMZM2G041424	5	30384873	30385423	CRA_2017SY	30382427	SNP_5_30382427			1.005	6.329	0	0	0	0	0	0	0	0	0	0	0	0	2.45	0	0	0	0	15.64	0	0	0	0	0	0	0	0	0	0	0	0	0	84.44	0	0	0	20.35	8.94	0
378	GRMZM2G134862	5	32020368	32032192	CRN_2016SY	32022323	SNP_5_32022323	LOC_Os10g30640.1	translin, putative, expressed	80.2117	71.94	102.056	123.037	168.795	347.507	325.272	109.79	212.44	56.75	35.87	47.65	98.34	66.52	68.68	45.32	143.38	70.78	67.88	17.75	67.26	74.91	102.44	64.12	93.93	205.55	41.84	63.81	195.8	56.67	151.99	20.59	197.6	20.11	38.65	82.23	127.74	17.3	17	11.13
379	GRMZM2G134947	5	32055951	32057280	CRN_2016SY	32022323	SNP_5_32022323	LOC_Os10g02070.1	peroxidase precursor, putative, expressed	55.9111	9.219	42.131	0.436667	0	0	0	9.66	0	20.04	0	40.59	3.6	48.73	76.81	42.39	0	46.14	32.72	82.65	271.14	272.27	29	30.66	0	0	0	0	0	0	0	0	0	0	90.91	90.4	0	0	0	0
380	GRMZM2G007185	5	41566068	41576953	CRN_2017SY	41624300	SNP_5_41624300	LOC_Os06g46570.1	galactosyltransferase, putative, expressed	57.5111	21.184	40.969	37.5417	55.7042	34.5671	29.55	80.8	144.42	44.53	63.46	54.58	91.16	37.74	31.54	27.51	107.54	20.34	49.13	16.57	33.33	36.61	41.9	36.42	117.62	99.66	18.26	36.34	63.36	11.45	52.17	7.06	39.15	0	23.12	21.88	26.55	0	0	0
381	GRMZM2G168886	5	57215140	57231454	CRD_Mean;CRD_Mean	57257561	SNP_5_57257561;SNP_5_57261032	LOC_Os04g40830.1	cullin family domain containing protein, putative, expressed	46.7794	45.1645	65.641	73.6433	75.7417	101.507	90.1733	44.71	83.43	33.72	27.71	40.22	54.03	38.33	42.66	27.57	76.19	47.96	42.79	32.16	48.3	49.54	41.57	46.77	64.37	88.5	22.84	21.38	78.03	44.23	43.57	26.66	64	26.33	21.3	28.34	30.84	49.49	55.1	28.36
382	GRMZM2G469414	5	57234376	57240744	CRD_Mean;CRD_Mean	57257561	SNP_5_57257561;SNP_5_57261032	LOC_Os08g16460.1	NBS-LRR disease resistance protein, putative, expressed	3.115	4.6285	6.673	6.28667	3.14167	0.544286	6.05333	1.86	3.41	2.38	1.68	4.17	3.25	2.05	2.45	1.23	4.3	3.6	3.51	2.38	3.11	3.03	3.73	5.09	4.84	7.66	4.83	4.45	10.58	5.11	6.1	5.05	6.46	4.36	3.15	4.7	4.96	2.57	2.67	3.1
383	GRMZM2G053066	5	57275826	57277635	CRD_Mean;CRD_Mean	57257561	SNP_5_57257561;SNP_5_57261032	LOC_Os01g18100.1	OsRhmbd3 - Putative Rhomboid homologue, expressed	30.6156	58.343	37.223	30.6633	65.2092	90.6971	44.6817	25.14	21.63	37.66	29.4	42.6	26.37	30.41	35.47	17.56	24.66	30.37	28.92	32.5	34.73	31.62	37.55	38.2	26.29	39.29	76.01	86.05	27.94	81.94	68.68	102.02	44.73	59.64	65.52	60.13	59.05	30.59	35.77	82.95
384	GRMZM2G028108	5	59628458	59632520	CRA_2017SY	59630336	SNP_5_59630336	LOC_Os06g49670.1	pentatricopeptide, putative, expressed	11.0283	46.059	22.383	19.7333	17.9992	20.2186	34.805	6.94	7.9	6.75	12.77	7.83	8.44	10.51	13.5	5.49	9.28	10.23	11.5	16.25	13.99	14.44	10.76	18.43	13.5	13.15	61.79	71.28	16.75	71.21	48	96.1	32.7	41.9	40.51	36.05	42.18	36.09	24.18	77.47
385	GRMZM2G497131	5	59633270	59633865	CRA_2017SY	59630336	SNP_5_59630336			15.4239	34.974	25.148	20.075	20.77	18.5557	35.425	4.68	6.4	14.7	8.19	7.87	6.47	10.89	13.51	6.68	10.03	15.58	12.16	22.17	26.7	22.19	29.86	33.77	25.78	16.26	54.18	54.5	21.08	78.89	38.45	68.24	21.02	25.25	20.42	13.91	19.21	9.93	21.11	53.11
386	GRMZM2G028007	5	59634109	59635447	CRA_2017SY	59630336	SNP_5_59630336	LOC_Os06g49680.1	expressed protein	33.9517	33.587	48.095	27.445	30.3125	32.7043	38.985	38.64	24.38	58.01	31.81	23.62	22.49	47.17	47.6	26.34	16.34	24.63	19.5	25.66	37.65	36.23	43.9	68.07	19.09	34.78	45.14	28.98	36.85	35.88	17.25	23.51	21.03	50.22	52.14	43.9	15.93	66.14	48.82	14.39
387	GRMZM2G148954	5	60687075	60700081	CRN_Mean	60687020	SNP_5_60687020	LOC_Os07g33330.1	RNA recognition motif containing protein, putative, expressed	1.90278	0.7195	1.017	1.78833	1.63917	3.24143	3.45167	2.34	2.12	1.01	0.88	1.29	8.44	1.69	1.75	0.75	2.45	1.14	1.01	0.64	1.73	1.55	2.33	0.8	2.33	11.41	0	0	1.66	0	0.65	0	0.67	0	0	0	0	0	0	0
388	GRMZM2G126990	5	60703277	60703883	CRN_Mean	60687020	SNP_5_60687020	LOC_Os09g36100.2	expressed protein	4.29389	0.391	4.153	0	2.2275	9.92571	4.31833	0	0	0	3.96	0	0	4.44	6.66	0	14.32	0	0	12.73	6.42	10.27	6.56	8.06	3.87	0	0	0	0	0	0	0	0	7.82	0	0	0	0	0	0
389	GRMZM2G383168	5	63819388	63823087	CRD_2017SY	63833060	SNP_5_63833060	LOC_Os07g22700.1	tim44-like domain containing protein, expressed	0	0	0	0	0	0	0	0	0	0	0	0	0	0	0	0	0	0	0	0	0	0	0	0	0	0	0	0	0	0	0	0	0	0	0	0	0	0	0	0
390	GRMZM5G834758	5	63828350	63830554	CRD_2017SY	63833060	SNP_5_63833060	LOC_Os06g51220.2	HMG1/2, putative, expressed	5316.97	3959.43	4890.1	5630.68	3372.8	2767.44	5694.07	5027.57	5437.18	5217.63	5916.11	5117.46	4523.99	6283.25	5854.03	3505.38	5358.68	5613.63	6013.02	7524.03	4927.53	4653.5	5183.89	5926.31	3622.35	5519.68	2944.35	3010.58	6992.42	4359.85	4697.71	1666.93	3720.83	1920.13	3018	3437.79	3446.83	2816.53	3702.03	2875.98
391	GRMZM2G168762	5	74647288	74651444	CRA_2017SY	74698918	SNP_5_74698918	LOC_Os02g03860.1	mitochondrial ATP synthase precursor, putative, expressed	743.839	465.912	718.259	535.235	658.227	809.997	822.552	896.33	1286.16	777.66	729.85	686.96	1067.15	688.59	623.69	492.08	1148.87	547.84	599.82	385.65	629.23	608.56	800.69	707.66	712.32	987.74	481.81	404.22	656.74	515.62	689.6	508.47	631.41	356.15	294.2	295.17	298.11	362.4	386.19	436.73
392	GRMZM2G168791	5	74651644	74656315	CRA_2017SY	74698918	SNP_5_74698918	LOC_Os02g03850.1	glycosyltransferase, putative, expressed	105.417	111.23	97.2	49.7083	60.4375	60.7543	102.867	110.58	96.74	127.86	134.71	144.82	135.83	110.64	104.83	69.97	90.54	96.47	97.9	131.7	99.21	91.61	88.26	95.88	69.95	89.66	148.91	85.52	52.93	163.37	58.47	220	45.52	64.19	51.76	41.95	32.81	67.97	104.35	122.36
393	GRMZM2G017249	5	74670508	74672296	CRA_2017SY	74698918	SNP_5_74698918	LOC_Os02g03840.2	expressed protein	292.721	760.373	440.058	163.287	76.0058	6.34857	34.17	206.76	271.92	181.61	170.63	122.69	301.15	256.74	276.09	149.86	213.08	246.65	222.47	263.55	498.24	606.42	635.78	433.82	211.52	155.44	1067.06	461.65	76.11	697.35	275.89	1587.77	149.51	1222.82	159.62	141.16	293.53	1755.92	1472.4	1263.14
394	GRMZM2G017229	5	74672931	74676062	CRA_2017SY	74698918	SNP_5_74698918	LOC_Os02g03840.2	expressed protein	99.7467	403.031	161.5	90.7817	34.7833	1.24571	14.0833	84.71	130.85	50	90.16	62.39	136.51	73.29	81.94	57.65	111.3	118.32	96.46	86.72	125.6	181.36	112.26	117.92	78	99.67	704.78	290.78	45.38	370.48	173.12	1001.21	103.55	574.97	84.98	72.13	173.51	981.02	701.73	658.06
395	GRMZM2G318375	5	74687627	74691024	CRA_2017SY	74698918	SNP_5_74698918			2.35333	19.8835	2.777	1.31	25.5225	66.1	0.156667	0	0.93	0	0	2.98	1.77	1.01	0.54	0.73	3.99	0	0.61	1.1	15.72	6.55	3.33	2.08	1.02	0	23.58	18.01	0	28.15	3.37	8.48	0	2.57	0	2.03	1.64	22.72	31.45	19.11
396	GRMZM2G493549	5	74691081	74692185	CRA_2017SY	74698918	SNP_5_74698918	LOC_Os02g03830.1	expressed protein	29.9678	13.7705	4.929	9.68167	15.2658	48.15	0	68.26	25.24	70.4	25.25	76.44	24.97	34.83	23	21.81	27.46	32.23	6.02	2.98	40.25	25.39	20.07	13.15	1.67	0.7	18.83	11.6	15.02	29.25	1	5.22	1.33	0	0	0	0	22.53	21.72	7.57
397	GRMZM2G016168	5	74695924	74699984	CRA_2017SY	74698918	SNP_5_74698918	LOC_Os02g03820.1	expressed protein	9.34944	10.8215	11.241	14.69	13.8208	14.9186	20.73	12.83	16	10.11	9.87	12.28	10.01	8.22	10.4	6.5	10.78	8.42	8.04	5.09	6.95	7.07	9.05	7.91	8.76	15.11	13.28	10.85	17.21	12.08	11.86	12.55	17.94	10.81	9.3	9.31	9.73	7.19	6.14	10.93
398	AC211514.2_FG003	5	84374908	84376767	CRN_Mean	84414638	SNP_5_84414638			0	0	0	0	0	0	0	0	0	0	0	0	0	0	0	0	0	0	0	0	0	0	0	0	0	0	0	0	0	0	0	0	0	0	0	0	0	0	0	0
399	GRMZM2G015200	5	94790939	94794227	CRA_Mean	94812632	SNP_5_94812632	LOC_Os03g12720.1	expressed protein	49.1483	34.413	46.942	45.4783	47.3283	24.2686	58.89	50.08	69.44	48.31	45.74	48.3	54.11	43.83	48.22	32.35	63.05	44.89	43.92	38.8	47.22	43.48	45.22	45.66	72.05	65.22	20.56	29.47	52.1	15.53	43.78	29.43	49.54	34.25	38.76	36.21	47.06	23.79	27.65	35.82
400	GRMZM2G006107	5	111290072	111300850	CRD_Mean	111294651	SNP_5_111294651	LOC_Os02g10970.1	peptidyl-prolyl cis-trans isomerase, putative, expressed	111.655	135.086	162.676	157.602	239.095	428.921	200.255	98.72	143.38	80.54	89.25	115.11	121.03	91.49	94.01	60.14	146.26	109.08	100.16	85.28	132.32	123.42	116.27	119.36	183.97	229.42	116.33	110.27	155.42	103.46	120.01	139.3	165.69	108.75	78.85	100.18	109.73	140.74	134.83	162.44
401	GRMZM2G067549	5	111342744	111344007	CRD_Mean	111294651	SNP_5_111294651			0	0	0	0	0	0	0	0	0	0	0	0	0	0	0	0	0	0	0	0	0	0	0	0	0	0	0	0	0	0	0	0	0	0	0	0	0	0	0	0
402	GRMZM2G144081	5	112964229	112966353	CRD_Mean	112972297	5:112972297	LOC_Os02g10800.1	mitochondrial carrier protein, putative, expressed	0.0305556	4.3455	1.018	0.553333	5414.94	19483.3	185.91	0	0	0	0	0	0	0	0	0	0.55	0	0	0	0	0	0	0	0	0	1.67	0	0	0	0	0	0	0	14.62	2.13	15.85	28.95	5.33	9.29
403	GRMZM2G118098	5	130532791	130538994	CRN_Mean	130569990	SNP_5_130569990	LOC_Os02g19330.1	expressed protein	52.445	74.349	71.057	75.62	81.7408	110.057	76.3083	50.77	68.52	40.59	50.8	50.52	56.61	51.81	52.76	32.93	67.2	51.33	49.01	50.13	54.3	51.76	47.99	60.14	56.84	98.84	84.84	70.05	86.57	80.15	87.22	88.03	77.27	64.24	52.06	58.81	61.61	80.64	76.24	73.97
404	GRMZM2G412604	5	158723799	158728514	CRN_2015SY	158774511	SNP_5_158774511	LOC_Os02g20360.1	tyrosine aminotransferase, putative, expressed	467.501	883.229	119.718	53.355	60.8775	97.47	10.44	129.65	125.27	154.69	195.72	29.98	172.04	207.71	256.29	109.01	112.56	182.75	432.85	496.89	1302.75	1649.33	1367.62	1288.5	201.4	71.03	153.49	572.7	9.1	1671.27	40.73	349.52	35.36	2594.59	15.67	12.75	24.36	1938.18	1742.47	2708.79
405	AC212967.3_FG001	5	166432733	166434132	CRD_2015SY	166452989	SNP_5_166452989			0	0	0	0	0	0	0	0	0	0	0	0	0	0	0	0	0	0	0	0	0	0	0	0	0	0	0	0	0	0	0	0	0	0	0	0	0	0	0	0
406	AC214350.3_FG007	5	166435179	166438143	CRD_2015SY	166452989	SNP_5_166452989	LOC_Os02g32120.1	cytochrome b-c1 complex subunit Rieske, mitochondrial precursor, putative, expressed	499.112	422.384	422.359	476.523	565.858	786.821	536.89	566.7	685.04	525.29	540.98	669.37	497.57	463.53	432.94	327.24	633.71	457.42	462.84	344.91	417.05	444.24	548.3	473.58	493.31	535.82	528.97	376.95	474.88	415.89	411.38	644.89	362.71	381.06	335.73	462.23	358.22	358.02	430.89	471.41
407	GRMZM2G146380	5	176985518	176986621	CRA_2016SY	176999832	SNP_5_176999832	LOC_Os02g36880.1	No apical meristem protein, putative, expressed	38.265	7.146	14.482	12.2817	19.1542	0.704286	8.92667	7.7	0	18.5	32.15	8.39	36.22	59.45	69.44	23.7	9.73	29.45	49.82	179.41	44.17	41.22	13.44	23.28	42.7	18.14	0	5.14	0	0	0	0	0	0	0	0	0	0	4.46	0
408	GRMZM2G001223	5	177037863	177039897	CRA_2016SY	176999832	SNP_5_176999832	LOC_Os02g36890.1	MYB family transcription factor, putative, expressed	0.0383333	21.145	4.534	8.23667	19.7142	0.452857	0.718333	0	0	0	0	0	0	0	0	0	0	0	0	0	0	0	0.69	0	0	9.41	0	1.52	2.04	0	55.48	0	64.69	0	21.94	50.13	217.69	0	0	0
409	GRMZM2G465310	5	187517129	187517740	CRD_2017SY	187537886	SNP_5_187537886	LOC_Os04g48270.4	OsFBX148 - F-box domain containing protein, expressed	0	0	0	0	0	0	0	0	0	0	0	0	0	0	0	0	0	0	0	0	0	0	0	0	0	0	0	0	0	0	0	0	0	0	0	0	0	0	0	0
410	GRMZM2G165290	5	187519222	187521068	CRD_2017SY	187537886	SNP_5_187537886	LOC_Os02g42210.1	membrane-associated salt-inducible protein like, putative, expressed	57.0144	46.9125	57.608	73.0167	104.637	212.416	124.175	79.06	133.59	42.33	29.78	41.66	70.82	51.36	52.56	36.42	110.62	56.95	52.6	26.81	43.05	45.23	58.65	44.26	50.51	146.28	16.3	24.74	90	20.53	64.64	33.99	93.1	33.97	39.1	49.82	50.57	32.71	44.24	36.37
411	GRMZM2G159901	5	187812443	187813376	CRN_2016SY	187773832	SNP_5_187773832			117.129	47.4265	100.892	46.9833	93.3975	133.303	70.845	95.85	31.49	217.78	131.98	132.87	114.11	137.37	167.69	84.31	34.59	187.09	96.63	123.36	110.64	128.02	148	104.04	62.51	47.39	70.07	60.15	35.05	45.57	42.86	52.96	20.4	44.13	83	51.13	34.64	11.57	23.57	54.84
412	AC209208.3_FG004	5	193335722	193337380	CRD_2017SY	193364742	SNP_5_193364742	LOC_Os08g09890.1	expressed protein	0	0	0	0	0	0	0	0	0	0	0	0	0	0	0	0	0	0	0	0	0	0	0	0	0	0	0	0	0	0	0	0	0	0	0	0	0	0	0	0
413	AC209208.3_FG003	5	193352050	193354601	CRD_2017SY	193364742	SNP_5_193364742	LOC_Os02g44590.1	OsSub20 - Putative Subtilisin homologue, expressed	5.20222	0.525	1.284	46.9233	0.883333	0	1.13	2.51	2.59	1.25	3.68	0	2.07	2.74	4.34	2.59	1.92	4.01	3.95	1.68	11.69	16.14	16.76	4.63	11.09	0.54	0	0.87	0	0	3.92	0	0	0	0	0	5.17	0	0	0
414	AC209208.3_FG002	5	193359341	193362190	CRD_2017SY	193364742	SNP_5_193364742	LOC_Os02g44630.1	aquaporin protein, putative, expressed	6766.49	2592.07	3708.15	4303.25	3533.37	96.5571	1555.97	7975.77	6506.53	8301.96	14148.9	4938.94	7366.39	6448.44	5738.36	4764.7	6821.29	5660.05	5149	3284.38	4523.13	5617	7271.63	4956.76	12323.5	1813.84	1918.41	2401.19	3022.82	472.4	7877.82	1178.79	4415.35	1696.93	2698.46	4391.8	11172.1	653.36	737.52	2179.44
415	AC209208.3_FG001	5	193362682	193370960	CRD_2017SY	193364742	SNP_5_193364742	LOC_Os02g44642.1	STE_MEKK_ste11_MAP3K.10 - STE kinases include homologs to sterile 7, sterile 11 and sterile 20 from yeast, expressed	33.6828	43.6415	36.203	53.0717	53.8667	69.5343	31.3567	35.94	38.03	25.16	45.93	41.08	32.88	31.23	35.51	19.62	35.93	24.87	32.67	33.22	35.17	37.91	30.75	38.42	31.97	59.87	73.3	53.21	48.95	49.12	54.94	64.29	50.35	31.78	53.32	40.02	53.45	44.17	32.17	41.96
416	GRMZM2G126517	5	198075720	198082820	CRD_Mean	198121660	SNP_5_198121660	LOC_Os08g39420.2	uncharacterized protein yeiN, putative, expressed	72.5144	60.758	72.251	51.2317	89.5742	153.211	73.0867	66.96	73.76	71.93	66.71	65.4	64.89	76.53	80.5	47.68	76.17	73.97	67.16	84.21	82.85	77.34	72.28	79.59	77.33	68.28	74.31	65.19	55.77	75.24	28.72	80.01	52.02	69.03	51.99	44.59	37.95	62.52	61.64	67.42
417	GRMZM2G126572	5	198085203	198086627	CRD_Mean	198121660	SNP_5_198121660	LOC_Os10g41800.1	expressed protein	9.49556	26.557	8.875	4.40333	1.145	0	1.97667	1.67	0	6.96	9.15	1.31	2.18	11.12	14.49	9.04	8.43	10.97	12.92	39.76	18.83	12.63	6.95	4.51	0	9.48	25.52	20.36	0	6.29	7.22	20.93	3.76	58.15	15.39	20.06	14.39	105.88	54.67	37.31
418	GRMZM2G428233	5	198091843	198095258	CRD_Mean	198121660	SNP_5_198121660	LOC_Os10g41870.1	expressed protein	0.186111	0.18	0	0	0.0191667	0	0	0	0	0	0	0	0	0	0.28	0	1.51	0	0	0.81	0.48	0.27	0	0	0	0	0.91	0	0	0	0	1.58	0	0	0	0	0	0	0	0
419	GRMZM2G126580	5	198095632	198096564	CRD_Mean	198121660	SNP_5_198121660	LOC_Os02g46440.1	expressed protein	10.8267	215.922	34.36	56.1583	19.6617	10.4514	42.5283	4.06	3.66	10.89	10.56	5.49	12.84	14.2	16.16	5.95	12.32	7.95	11.99	10.05	14.29	8.57	16.9	12.89	16.11	107.04	392.88	432.47	32.06	323.16	308.92	609.8	144.51	175.65	240.95	243.5	155.01	117.61	106.66	247.88
420	GRMZM2G428242	5	198096737	198128330	CRD_Mean	198121660	SNP_5_198121660	ChrUn.fgenesh.mRNA.85	expressed protein	29.2339	37.4615	39.515	48.5783	46.7925	58.9114	45.4667	25.97	33.88	22.26	35.82	31.53	30.56	24.05	25.52	15.67	35.21	33.39	33.28	30.3	28.04	29.63	23.04	30.07	37.99	48.97	38.06	28.89	48.53	31.81	32.05	44	42.95	32.63	29.92	22.18	28.29	51.03	36.17	42.9
421	GRMZM2G428251	5	198130289	198131355	CRD_Mean	198121660	SNP_5_198121660	LOC_Os03g05460.1	expressed protein	0	0	0	0	0	0	0	0	0	0	0	0	0	0	0	0	0	0	0	0	0	0	0	0	0	0	0	0	0	0	0	0	0	0	0	0	0	0	0	0
422	GRMZM2G126642	5	198156926	198170561	CRD_Mean	198121660	SNP_5_198121660			0	0	0	0	0	0	0	0	0	0	0	0	0	0	0	0	0	0	0	0	0	0	0	0	0	0	0	0	0	0	0	0	0	0	0	0	0	0	0	0
423	GRMZM5G832989	5	205359919	205365715	CRN_Mean	205397268	SNP_5_205397268	LOC_Os02g50320.1	ATMAP70 protein, putative, expressed	34.5094	42.3355	85.775	104.198	151.652	175.819	158.653	36	68.01	26.72	18.33	30.86	58.28	31.48	32.75	21.49	60.23	35.46	36.59	20.41	18.85	18.93	23.87	17.33	65.58	157.57	31.12	45.73	150.19	13.35	148.71	13.17	146.3	1.55	7.86	17.18	83.61	0	5.29	3.52
424	GRMZM2G109787	5	205377312	205378090	CRN_Mean	205397268	SNP_5_205397268			18.5267	18.394	30.853	126.638	41.37	1.53857	11.2467	9.56	1.07	6.9	1.53	31.86	15.5	22.22	22.69	10.58	4.5	29.8	25.31	32	31.79	29.69	12.53	35.7	10.25	12.51	5.84	4.64	42.22	4.74	18.49	8.5	18.05	31.32	16.61	18.49	47.3	29.52	18.73	24.8
425	GRMZM2G481730	5	205385818	205389710	CRN_Mean	205397268	SNP_5_205397268	LOC_Os02g50330.1	RNA-dependent RNA polymerase, putative, expressed	42.0272	36.9755	58.487	213.817	83.2667	4.79	21.5433	13.47	3.7	21.16	7.31	45.6	21.95	43.67	64.13	28.1	7.46	50.21	48.29	69.04	90.85	70.08	60.63	84.16	26.68	23.82	12.06	12.16	68.83	8.98	28.94	15.34	30.12	71.16	62.22	40.68	78.51	55.05	50.53	43.67
426	GRMZM2G181507	5	205389771	205394790	CRN_Mean	205397268	SNP_5_205397268	LOC_Os02g50340.1	membrane attack complex component/perforin/complement C9, putative, expressed	22.5506	0.806	0.693	0.12	0	0	0	30.25	37.55	14.73	27.54	12.29	10.48	27.44	24.95	13.25	37.03	10.03	33.52	22.61	23.2	17.99	18.97	28.77	15.31	4.42	0	0	0	0	0	0	0	0	0	0	0	0	0	0
427	GRMZM2G181505	5	205395331	205401232	CRN_Mean	205397268	SNP_5_205397268	LOC_Os02g50350.1	dihydroorotate dihydrogenase protein, putative, expressed	630.073	247.798	134.18	191.58	323.651	498.751	238.832	1008.28	1314.05	539.8	1450.92	397.68	828.48	690.24	547.72	430.58	1149.41	211.35	593.28	351.92	209.36	254.53	391.18	384.59	587.94	503.35	417.24	305.37	218.25	151.07	414.72	104.19	236.5	71.88	130.58	232.38	198.6	128.23	170.68	124.94
428	GRMZM2G357923	5	205419985	205425411	CRN_Mean	205397268	SNP_5_205397268	LOC_Os03g17432.1	pre-mRNA-splicing factor ATP-dependent RNA helicase DHX16, putative, expressed	23.5339	27.0765	33.799	33.6667	43.3417	71.7743	48.7183	25.31	50.31	15.83	13.97	17.59	29.61	17.63	19.81	12.69	47.53	20.94	19.51	12.66	23.21	21.79	20.87	20.11	34.24	52.85	23.86	25.74	50.37	24.7	33.24	29.92	42.72	13.09	17.02	19.72	19.99	19.38	27.25	22.67
429	GRMZM2G059496	5	205425710	205427122	CRN_Mean	205397268	SNP_5_205397268			17.345	5.6575	15.495	6.09333	19.1208	3.68429	12.87	14.46	3.58	27.91	29.62	35.78	17.44	20.34	21.98	7.49	3.22	16.2	20.67	40.85	10.18	8.53	9.97	19.05	4.94	11.89	0	4.81	14.29	5.22	13.32	8.14	5.92	4.98	4.34	3.98	8.81	4.81	0	0
430	GRMZM2G059526	5	205430607	205431125	CRN_Mean	205397268	SNP_5_205397268			3.98889	1.3915	2.63	0	0	0	17.0417	0	0	0	0	0	0	4.24	12.25	4.24	1.72	0	6	17.06	17.34	6.09	0	2.86	0	0	0	0	0	0	0	0	0	0	0	6.98	0	15.43	0	0
431	GRMZM2G303509	5	205443432	205443987	CRN_Mean	205397268	SNP_5_205397268	LOC_Os02g50400.1	expressed protein	9.01833	4.8965	0.247	0	0	0	0	0	0	12.67	11.22	0	0	2.33	9.02	4.03	4.98	20.38	25.2	47.22	5.11	9.68	8.3	2.19	0	10.94	0	0	0	0	0	0	0	5.21	0	0	0	0	7.23	0
432	AC203430.3_FG007	5	205445765	205448632	CRN_Mean	205397268	SNP_5_205397268	LOC_Os02g50400.1	expressed protein	0	0	0	0	0	0	0	0	0	0	0	0	0	0	0	0	0	0	0	0	0	0	0	0	0	0	0	0	0	0	0	0	0	0	0	0	0	0	0	0
433	GRMZM2G376103	5	205560350	205560601	CRD_2016SY	205610426	5:205610426	LOC_Os02g50400.1	expressed protein	0	0	0	0	0	0	0	0	0	0	0	0	0	0	0	0	0	0	0	0	0	0	0	0	0	0	0	0	0	0	0	0	0	0	0	0	0	0	0	0
434	GRMZM2G376105	5	205563523	205563765	CRD_2016SY	205610426	5:205610426	LOC_Os02g50400.1	expressed protein	0	0	0	0	0	0	0	0	0	0	0	0	0	0	0	0	0	0	0	0	0	0	0	0	0	0	0	0	0	0	0	0	0	0	0	0	0	0	0	0
435	GRMZM2G151204	5	205591409	205593381	CRD_2016SY	205610426	5:205610426	LOC_Os02g50460.1	immediate-early fungal elicitor protein CMPG1, putative, expressed	6.35833	1.3025	1.823	1.34167	0	0	0.316667	3.11	0	7.28	1.51	3.43	5.97	8.4	10.11	3.92	5.73	8.05	6.87	21.8	10.83	9.48	4.2	3.76	0	3.29	0	0	0	0	0	0	0	0	0	0	0	0	0	0
436	GRMZM2G151223	5	205601061	205610801	CRD_2016SY	205610426	5:205610426	LOC_Os02g50480.1	histidine kinase, putative, expressed	100.619	48.91	76.058	90.9267	89.62	60.8157	127.357	131.46	158.19	121.4	219	85.32	125.26	86.1	77.69	59.12	147.17	91.71	86.31	67.18	55.97	63.04	68.03	73.83	94.37	64.88	24.99	38.83	90.96	9.32	84.84	13.16	38.26	22.55	62.37	67.21	60.55	27.19	30.83	21.14
437	GRMZM2G151257	5	205619331	205622828	CRD_2016SY	205610426	5:205610426	LOC_Os02g50490.1	endoglucanase, putative, expressed	100.408	46.8635	28.068	12.6933	6.95	1.78	16.2517	94.92	61.9	143.01	128.82	80.12	206.06	122.04	103.2	64.44	50.92	74.7	86.94	204.61	60.74	62.56	73.44	129.69	59.24	18.81	17.25	16.8	0	41.29	10.98	13.05	0	37.75	255.62	340.17	136.54	22.2	4.69	0
438	GRMZM5G870253	5	205623250	205636729	CRD_2016SY	205610426	5:205610426	LOC_Os02g50550.1	dynamin, putative, expressed	223.214	107.954	145.493	168.693	131.153	50.2943	139.935	286.35	582.64	137.92	125.93	229.06	291.52	171.98	145	133.28	421.21	109.66	178.32	74.48	131.49	161.21	274.51	236.65	326.65	304.93	24.25	92.65	225.48	13.23	394.3	13.62	277.21	14.52	97.16	153.01	380.13	27.13	14.51	17.56
439	GRMZM2G163325	5	205647901	205650404	CRD_2016SY	205610426	5:205610426	LOC_Os02g50550.1	dynamin, putative, expressed	154.472	80.1565	106.649	130.643	94.6142	35.3129	104.908	209.22	474.81	58.09	104.29	161.07	239.53	93.4	94.9	84.45	384.08	87.2	153.74	41.15	61.85	103.87	72.73	132.21	223.91	296.61	19.92	72.32	188.95	15.05	312.58	10.07	242.57	6.09	49.2	84.66	199.17	22.61	8.5	13.65
440	GRMZM2G351832	5	206611851	206612867	CRD_2016SY	206661137	SNP_5_206661137	LOC_Os02g50940.1	NHL repeat-containing protein, putative, expressed	69.7072	35.985	41.488	51.18	52.0383	76.6229	94.7083	79.81	65.65	105.33	128.37	28.97	65.49	85.56	74.33	61.31	59.84	91.96	73.54	171.68	38.51	27.01	29.11	37.47	30.79	33.02	0	11.99	49.19	0	32.2	12.89	37.23	67.79	74.35	98.34	157.56	0	6.53	12.31
441	GRMZM2G053396	5	206622977	206625653	CRD_2016SY	206661137	SNP_5_206661137	LOC_Os02g01610.1	pentatricopeptide, putative, expressed	8.41667	10.5985	13.923	19.89	17.7092	22.1529	19.51	7.54	12.18	5.56	7.2	11.54	11.47	6.93	7.72	3.58	14.96	9.73	8.13	5.5	8.23	6.66	6.7	8.2	9.67	15.38	5.84	5.41	17.9	11.75	10.99	11.45	16.87	9.97	3.58	7.89	12.54	10.05	5.12	10.94
442	GRMZM2G053420	5	206628508	206636846	CRD_2016SY	206661137	SNP_5_206661137	LOC_Os01g60190.1	2,3-bisphosphoglycerate-independent phosphoglycerate mutase, putative, expressed	0.401667	0.2745	0.228	0.248333	0.241667	0.317143	0.276667	0.12	0.26	0.06	0.16	0.12	3.77	0.18	0.23	0.13	0.33	0.25	0.16	0.16	0.27	0.21	0.28	0.16	0.38	4.03	0	0	0.3	0	0.11	0.23	0.33	0	0	0	0	0	0	0
443	GRMZM2G140635	5	206664116	206666692	CRD_2016SY	206661137	SNP_5_206661137	LOC_Os02g50970.1	protein kinase domain containing protein, expressed	136.589	116.489	82.227	346.677	89.8617	126.416	50.57	144.5	139.36	164.92	169.94	172.79	141.98	138.18	151.85	89.45	122.84	114.73	120.05	154.8	146.53	145.04	145.15	128.14	68.36	121.26	238.59	136.78	49.34	195.16	64.41	171.31	60.17	100.52	99.94	85.63	85.3	135.43	115.42	126.71
444	GRMZM2G140651	5	206668569	206670921	CRD_2016SY	206661137	SNP_5_206661137	LOC_Os02g50990.2	RING-H2 finger protein ATL1Q, putative, expressed	222.565	176.32	124.767	88.5117	48.8633	22.0443	26.1567	234.37	14.65	382.35	472.79	204.54	83.51	213.11	229.47	127.71	23.41	126.08	131.51	139.9	244.67	298.51	543.25	479.9	56.44	107.38	51.66	56.66	124.26	36.23	88.81	83.05	75.22	171.74	810.61	1056.13	582.86	68.35	46.56	19.08
445	GRMZM2G127632	5	206672627	206685163	CRD_2016SY	206661137	SNP_5_206661137	LOC_Os02g50970.1	protein kinase domain containing protein, expressed	94.7461	102.149	60.131	75.0883	69.2942	88.63	37.1333	111.66	118.37	75.81	140.35	139.15	123.06	85.01	98.65	63.82	104.58	98.89	87.5	96.12	85.74	91.38	53.17	78.15	54.02	121.76	225.18	126.11	45.68	158.67	57.57	151.81	67.2	94	82.16	68.84	78.14	123.68	100.14	106.8
446	GRMZM5G855200	5	214556200	214560912	CRD_2015SY	214609240	SNP_5_214609240	LOC_Os02g56200.2	ELMO/CED-12 family protein, putative, expressed	70.0783	170.954	121.005	118.645	118.952	135.171	97.5817	50.53	50.89	59.47	50.21	59.59	53.87	62.8	76.08	40.18	56.95	59.69	58.71	73.55	106.67	95.1	103.55	128.11	75.46	81.34	190.58	199.96	83.41	211.36	168.71	390.82	145.2	151.01	149.24	150.95	141.67	195.24	183.68	189.28
447	GRMZM2G465769	5	214562963	214563725	CRD_2015SY	214609240	SNP_5_214609240	LOC_Os02g56200.1	ELMO/CED-12 family protein, putative, expressed	18.3	74.11	35.68	37.9	37.75	45.4643	39.645	17.28	19.66	7.78	19.91	7.1	10.56	12.25	13.84	8.51	24.44	19.42	16.95	17.47	27.45	19.76	16.25	39.7	31.07	31.8	72.22	65.24	38.41	91.14	77.32	133.2	53.39	98.78	76.08	90.29	80.88	109.74	131.09	82.93
448	GRMZM2G163200	5	214574879	214580853	CRD_2015SY	214609240	SNP_5_214609240	LOC_Os02g56250.1	GATA zinc finger domain containing protein, expressed	141.976	153.362	141.249	97.595	132.975	124.864	91.4833	139.55	214.48	110.65	85.17	150.09	147.46	106.79	110.65	77.65	174.31	79.53	132.32	138.43	161.53	163.89	157.77	215.01	190.29	109.03	25.46	71.99	140.15	34.11	334.86	33.64	261.93	110.6	151.48	241.97	508.14	190.34	169.34	92.47
449	GRMZM2G163195	5	214583160	214586098	CRD_2015SY	214609240	SNP_5_214609240	LOC_Os02g56260.1	expressed protein	19.2967	0	6.627	0	0	0	0	19.55	57.29	0.58	2.04	0.76	8.83	21.59	23.7	15	27	23.71	29.83	5.94	18.83	21.45	24.88	25.74	20.62	0	0	0	0	0	0	0	0	0	0	0	0	0	0	0
450	GRMZM6G608324	5	217004905	217006947	CRN_2015SY	217011007	SNP_5_217011007	LOC_Os02g58470.1	expressed protein
451	GRMZM2G362341	5	217007415	217011436	CRN_2015SY	217011007	SNP_5_217011007			1.60611	0.557	2.067	1.31167	4.2725	8.11571	2.685	1.97	3.99	0.78	0.78	1.04	2.88	0.89	1.17	0.86	3.23	2.36	1.15	0.57	1.28	1.36	1.18	1.42	2	4.43	0.27	0.18	2.47	0	1.17	0.08	1.98	0	0	0	0	0	0	0
452	GRMZM2G048470	5	217056143	217061279	CRN_2015SY	217011007	SNP_5_217011007	LOC_Os02g58500.1	phospholipase A2, putative, expressed	0.846111	0.0885	2.547	0.00666667	0.0891667	0.0442857	0.401667	0.74	0	1.11	0.01	0	0	0	1.17	0	0	0	1.37	4.8	3.43	0.69	1.32	0.59	0	0	0	0	1.34	0	0	0	0	0	0	0	0	0.43	0	0
453	GRMZM2G048497	5	217060968	217062964	CRN_2015SY	217011007	SNP_5_217011007	LOC_Os02g58510.1	GHMP kinases ATP-binding protein, putative, expressed	150.98	119.032	116.657	87.5033	102.065	144.649	155.122	220.96	93	292.14	301.21	166.64	156.84	130.33	140.86	105.29	105.88	105.92	117.72	122.77	115.42	116.67	178.99	138.98	108.02	142.6	117.74	102.68	122.63	73.29	119.01	89.88	88.62	176.07	198.23	176.57	138.78	155.02	148.55	80.25
454	GRMZM2G573732	6	6001783	6008058	CRN_2015SY	6030732	SNP_6_6030732	LOC_Os03g62388.1	expressed protein	21.1811	32.4955	34.099	40.6283	31.0925	31.7986	25.29	22.83	28.87	11.4	19.9	28.72	26.26	17.53	21.94	14.36	28.4	23.31	21.04	16.63	18.89	20.74	15.42	22.58	22.44	37.29	54.47	39.01	37.63	54.54	36.32	47	37.81	24.9	10.78	14.1	22.48	31.16	25.78	34.61
455	GRMZM2G019257	6	6018105	6019357	CRN_2015SY	6030732	SNP_6_6030732	LOC_Os03g62379.1	MYB family transcription factor, putative, expressed	46.4556	59.6185	67.816	67.25	58.8283	69.9929	52.7017	42.79	55.29	33.7	31.73	46.59	47.77	42.39	45.73	29.07	53.6	37.26	43.08	40.92	58.51	54.09	55.66	61.17	56.85	62.99	84.3	65.18	67.3	86.72	69.33	70.59	55.49	43.16	25.22	41.95	68.61	64.36	83.88	50.38
456	GRMZM2G019398	6	6021428	6023097	CRN_2015SY	6030732	SNP_6_6030732	LOC_Os03g06050.1	expansin precursor, putative, expressed	36.7917	0	0	0.193333	0.195	0	0	24.42	40.15	17.29	74.04	0	4.08	70.5	30.72	55.98	231.87	14.08	29.59	19.62	18.61	21.54	8.38	1.38	0	0	0	0	0	0	0	0	0	0	0	0	0	0	0	0
457	GRMZM2G064174	6	6079000	6080001	CRN_2015SY	6030732	SNP_6_6030732	LOC_Os03g06050.1	expansin precursor, putative, expressed	16.0439	0	0	0	0	0	0	2.83	11.73	0	15.25	0	0	28.07	10.51	24.89	161.47	2.35	15.84	5.12	0	9.64	1.09	0	0	0	0	0	0	0	0	0	0	0	0	0	0	0	0	0
458	GRMZM5G822819	6	13382934	13383503	CRA_2016SY	13388202	SNP_6_13388202			7.84222	2.996	17.769	22.3567	15.9417	2.47571	23.7933	6.62	13.01	5.97	2.13	18.72	0	9.35	13.3	12.24	16.13	7.53	5.03	3.39	5.28	7.74	5.31	2.95	6.46	6.07	0	0	16.72	0	0	3.44	8.12	0	0	0	0	0	0	0
459	AC203176.4_FG003	6	13423879	13424673	CRA_2016SY	13388202	SNP_6_13388202			0	0.0875	0	0	0	0	0	0	0	0	0	0	0	0	0	0	0	0	0	0	0	0	0	0	0	1.75	0	0	0	0	0	0	0	0	0	0	0	0	0	0
460	GRMZM2G460371	6	26480394	26511544	CRN_Mean	26478333	SNP_6_26478333			0	0	0	0	0	0	0	0	0	0	0	0	0	0	0	0	0	0	0	0	0	0	0	0	0	0	0	0	0	0	0	0	0	0	0	0	0	0	0	0
461	GRMZM2G013617	6	56969090	56972316	CRN_2016SY	56950463	SNP_6_56950463	LOC_Os06g01934.1	homeobox domain containing protein, expressed	0.120556	238.17	26.883	3.58167	0	0	0	0	0	0	0	0	0	0	1.7	0	0	0	0	0	0	0	0.47	0	0	0	186.5	193.14	0	639.29	3.61	334.76	0	702.14	485.86	257.69	2.82	545.91	507.15	159.18
462	GRMZM2G548519	6	66780671	66781221	CRN_Mean	66741493	SNP_6_66741493			0	0	0	0.49	0	0	0	0	0	0	0	0	0	0	0	0	0	0	0	0	0	0	0	0	0	0	0	0	0	0	0	0	0	0	0	0	0	0	0	0
463	AC213839.3_FG004	6	66788482	66792461	CRN_Mean	66741493	SNP_6_66741493	LOC_Os02g38320.1	BTBZ3 - Bric-a-Brac, Tramtrack, Broad Complex BTB domain with TAZ zinc finger and Calmodulin-binding domains, expressed	0	0	0	0	0	0	0	0	0	0	0	0	0	0	0	0	0	0	0	0	0	0	0	0	0	0	0	0	0	0	0	0	0	0	0	0	0	0	0	0
464	GRMZM2G084173	6	68219540	68224677	CRD_2016SY	68175755	SNP_6_68175755			29.015	37.006	42.505	42.55	44.025	69.7786	52.6583	21.57	25.11	20.54	20.71	21.26	21.53	30.92	36.39	21.48	31.69	24.47	28.83	37.49	47.71	38.33	33.08	35.55	25.61	35.42	40.88	36.2	38.81	39.9	33.27	36.23	38.4	34.72	32.39	23.71	25.63	28.89	40.5	34.12
465	GRMZM2G378805	6	82459326	82460303	CRN_Mean	82496963	SNP_6_82496963			0	0	0	0	0	0	0	0	0	0	0	0	0	0	0	0	0	0	0	0	0	0	0	0	0	0	0	0	0	0	0	0	0	0	0	0	0	0	0	0
466	GRMZM2G150348	6	82492934	82493876	CRN_Mean	82496963	SNP_6_82496963	LOC_Os06g51220.2	HMG1/2, putative, expressed	0	0	0	0	0	0	0	0	0	0	0	0	0	0	0	0	0	0	0	0	0	0	0	0	0	0	0	0	0	0	0	0	0	0	0	0	0	0	0	0
467	GRMZM2G095489	6	82511860	82512493	CRN_Mean	82496963	SNP_6_82496963	LOC_Os11g38930.1	tRNA-splicing endonuclease subunit Sen2, putative, expressed	0	0	0	0	0	0	0	0	0	0	0	0	0	0	0	0	0	0	0	0	0	0	0	0	0	0	0	0	0	0	0	0	0	0	0	0	0	0	0	0
468	GRMZM2G009080	6	84214255	84215604	CRA_2016SY	84209475	SNP_6_84209475	LOC_Os06g50080.1	DUF581 domain containing protein, expressed	6.43722	1.2725	12.72	3.45667	10.8725	39.8786	9.33333	0	0	1.08	0	0	0	1.89	3.04	0	10.56	4.2	0	1.03	56.28	26.38	5.37	4.6	1.44	25.45	0	0	0	0	0	0	0	0	0	0	0	0	0	0
469	GRMZM2G075584	6	84226910	84260783	CRA_2016SY	84209475	SNP_6_84209475	LOC_Os06g50050.1	AAA-type ATPase family protein, putative, expressed	87.7778	48.753	60.284	63.7	105.605	195.411	75.5133	80.72	139.93	79.96	73.22	76.32	90.55	75.83	80.14	58.88	124.14	83.06	86.96	83.54	92.77	106.78	104.06	81.63	61.51	108.28	38.55	56.69	71.33	66.08	62.69	52.27	60.71	26.93	45.39	48.23	63.6	16.46	29.25	24.9
470	GRMZM5G811469	6	88191229	88196721	CRN_2016SY	88233608	6:88233608	LOC_Os11g19030.1	FAR1 family protein, expressed	0	0	0	0	0	0	0	0	0	0	0	0	0	0	0	0	0	0	0	0	0	0	0	0	0	0	0	0	0	0	0	0	0	0	0	0	0	0	0	0
471	GRMZM2G150726	6	88229201	88231783	CRN_2016SY	88233608	6:88233608	LOC_Os06g48320.1	EDR2, putative, expressed	84.2428	27.0175	37.611	16.9467	24.9617	43.5171	37.7417	131.84	98.96	119.27	102.2	68.14	127.15	98.74	102.53	67.32	73.21	56.73	62.56	80.87	84.25	71.99	59.97	70.71	39.93	35.5	31.11	28.17	0	39.29	43.92	0	25.48	17.59	46.33	77.42	50.49	62.81	32.73	0
472	GRMZM5G854499	6	88232209	88243549	CRN_2016SY	88233608	6:88233608	LOC_Os04g46450.1	zinc finger, C3HC4 type domain containing protein, expressed	16.4328	18.1585	19.807	19.8817	14.3958	4.76143	19.9733	18.49	13.39	16.79	30.97	23.95	21.54	12.79	14.44	7.85	14.41	15.39	15.89	19.99	14.62	14.98	11.94	14.95	13.41	18.04	25.17	12.73	17.18	13.35	15.43	24.01	17.78	19.96	17.64	13.34	10.75	24.37	21.43	22.49
473	GRMZM5G830671	6	88279708	88280617	CRN_2016SY	88233608	6:88233608	LOC_Os06g48290.1	homeobox associated leucine zipper, putative, expressed	0.380556	1.8775	0.156	0	0	0	0	0	0	0	0	0	0	0	0.91	0	0	0	0	0	5.94	0	0	0	0	0	0	0	0	0	0	14.86	0	5.46	0	0	0	7.5	7.93	0
474	GRMZM2G343068	6	91094278	91096039	CRA_2017SY	91103187	SNP_6_91103187	LOC_Os06g46560.1	myb-like DNA-binding domain containing protein, expressed	0	0	0	3.02333	0	0	0	0	0	0	0	0	0	0	0	0	0	0	0	0	0	0	0	0	0	0	0	0	0	0	0	0	0	0	0	0	0	0	0	0
475	GRMZM2G153666	6	99289722	99291588	CRD_Mean	99325758	SNP_6_99325758	LOC_Os06g40880.1	polygalacturonase, putative, expressed	0.169444	0	0	17.6833	2.68083	0.285714	0	0	0	1.16	1.89	0	0	0	0	0	0	0	0	0	0	0	0	0	0	0	0	0	0	0	0	0	0	0	0	0	0	0	0	0
476	GRMZM2G162384	6	99355988	99357434	CRD_Mean	99325758	SNP_6_99325758	LOC_Os06g35370.1	polygalacturonase, putative, expressed	0	0	0	26.2783	0	0	0	0	0	0	0	0	0	0	0	0	0	0	0	0	0	0	0	0	0	0	0	0	0	0	0	0	0	0	0	0	0	0	0	0
477	GRMZM2G701045	6	105562391	105563407	CRN_2015SY	105600792	SNP_6_105600792			7.26778	36.6495	19.053	9.26833	10.9258	13.9029	5.415	8.65	0.98	6.91	14.33	5.65	5.14	7.87	9.14	4.61	0.87	5.84	5.46	13.85	7.3	8.93	7.32	9.52	8.45	12.61	45.72	40.37	0.86	44.44	28.71	59.64	18.02	30.88	36.11	33.16	19.97	20.32	16.7	77.66
478	GRMZM2G701047	6	105570579	105571595	CRN_2015SY	105600792	SNP_6_105600792			7.32778	36.881	19.174	9.52167	11.0742	14.1829	5.47667	8.65	0.98	6.91	14.33	5.79	5.14	7.99	9.21	4.61	0.87	5.84	5.46	13.94	7.3	9.12	7.32	9.76	8.68	12.61	46.33	40.76	0.86	44.44	29.01	59.99	18.18	30.88	36.11	33.16	19.97	20.32	17.22	78.36
479	GRMZM2G328133	6	105576388	105577400	CRN_2015SY	105600792	SNP_6_105600792	LOC_Os06g35830.1	expressed protein	24.2883	2.2895	11.641	59.0633	0.109167	0	0	48.03	6.6	50.27	69.7	50.75	4.71	14.06	12.83	11.03	3.06	0	17.32	9.95	8.94	12.31	42.93	57.07	17.63	20.92	0	0	0	0	0	3.57	0	0	0	18.85	0	0	0	0
480	GRMZM2G101938	6	105593024	105601059	CRN_2015SY	105600792	SNP_6_105600792	LOC_Os06g35814.1	ras-related protein, putative, expressed	397.651	296.33	401.581	496.068	583.379	746.687	507.207	423.57	629.16	321.64	304.67	426.17	436.52	316.01	373.2	239.43	600.17	325.8	354.02	322.29	385.14	370.12	437.34	339.89	552.57	731.37	165.29	251.87	546.14	184.25	517.62	182.52	523.32	191.66	139.67	209.73	377.14	177.25	206.1	274.91
481	GRMZM2G403076	6	105602587	105605237	CRN_2015SY	105600792	SNP_6_105600792	LOC_Os06g35700.1	reticuline oxidase-like protein precursor, putative, expressed	4.56278	23.833	2.32	0.515	0	0	0.401667	1.76	0	2.7	9.15	0	0	4.1	4.67	1.8	2.77	0	3.74	34.48	3.61	3.02	0.91	0.67	8.75	11.6	11.5	9.05	0	2.79	0	0	0	27.2	5.99	0	0	0	17.24	23.51
482	GRMZM2G176660	6	105647132	105648007	CRN_2015SY	105600792	SNP_6_105600792			0	0	0	0	0	0	0	0	0	0	0	0	0	0	0	0	0	0	0	0	0	0	0	0	0	0	0	0	0	0	0	0	0	0	0	0	0	0	0	0
483	GRMZM2G067373	6	112528005	112538912	CRD_2016SY;CRD_2016SY	112539707	SNP_6_112539707;SNP_6_112539707	LOC_Os06g12030.1	glutaredoxin domain containing protein, putative, expressed	21.9844	30.0445	41.684	33.79	41.5342	54.5357	48.4067	18.71	34.09	15.85	14.22	7.91	25.59	24.68	30.65	19.76	35.21	27.18	23.1	20.98	19.78	21.13	16.03	18.05	22.8	81.93	7.39	8.32	53.04	6.86	4.77	3.33	18.21	13.78	3.93	6.32	3.37	35.72	59.37	27.55
484	GRMZM2G067361	6	112545401	112546980	CRD_2016SY;CRD_2016SY	112539707	SNP_6_112539707;SNP_6_112539707	LOC_Os03g24430.1	cytokinin-O-glucosyltransferase 3, putative, expressed	0	0	0	0	0	0	0	0	0	0	0	0	0	0	0	0	0	0	0	0	0	0	0	0	0	0	0	0	0	0	0	0	0	0	0	0	0	0	0	0
485	GRMZM2G067329	6	112554129	112555720	CRD_2016SY;CRD_2016SY	112539707	SNP_6_112539707;SNP_6_112539707	LOC_Os07g17400.1	zinc finger, RING-type, putative, expressed	0	0	0	0	0	0	0	0	0	0	0	0	0	0	0	0	0	0	0	0	0	0	0	0	0	0	0	0	0	0	0	0	0	0	0	0	0	0	0	0
486	GRMZM2G107092	6	115121583	115126417	CRN_2016SY	115160711	SNP_6_115160711	LOC_Os06g13600.1	HEAT repeat family protein, putative, expressed	104.323	87.1505	35.608	85.98	43.94	14.2786	37.8517	139.49	119.69	155.38	246.59	191.58	113.91	83.33	68.54	59.62	128.53	40.98	97.8	42.99	27.95	44.61	119.73	128.75	68.35	74.51	80.42	79.39	54.25	22.24	184.48	71	166.26	15.46	351.14	416.9	187.45	6.89	3.37	7.34
487	GRMZM2G334409	6	115166300	115178978	CRN_2016SY	115160711	SNP_6_115160711	LOC_Os06g13650.1	alpha-mannosidase 2, putative, expressed	31.0272	42.1345	45.89	43.7633	50.0558	63.9429	43.2317	29.64	34.21	25.94	24.88	38.56	32.49	25.42	26.93	16.07	40.98	33.61	27.06	27.52	35.63	34.19	33.91	33.73	37.72	48.81	30.27	30.11	51.04	37.98	38.56	41.7	45.08	42.69	28.57	30.36	35.25	51.2	56.85	56.15
488	AC211494.4_FG003	6	125814346	125815074	CRA_2016SY	125819593	SNP_6_125819593			0	0	0	0	0	0	0	0	0	0	0	0	0	0	0	0	0	0	0	0	0	0	0	0	0	0	0	0	0	0	0	0	0	0	0	0	0	0	0	0
489	GRMZM2G468475	6	125815129	125818633	CRA_2016SY	125819593	SNP_6_125819593	LOC_Os03g11540.1	RPA1B - Putative single-stranded DNA binding complex subunit 1, expressed	3.41611	1.518	3.534	4.34833	4.5425	4.87286	3.385	3.7	6.45	1.77	0.46	2.12	15.1	2.83	1.48	0	5.52	6.34	2.15	0	0.53	2.13	5.98	1.76	3.17	8.94	0	0.71	7.76	0	3.44	0	9.51	0	0	0	0	0	0	0
490	GRMZM2G468473	6	125820502	125825906	CRA_2016SY	125819593	SNP_6_125819593	LOC_Os02g38040.1	leucine-rich repeat family protein, putative, expressed	0	0	0	0	0	0	0	0	0	0	0	0	0	0	0	0	0	0	0	0	0	0	0	0	0	0	0	0	0	0	0	0	0	0	0	0	0	0	0	0
491	GRMZM2G053980	6	140246166	140251904	CRN_2016SY	140298004	SNP_6_140298004			9.525	4.7745	12.906	20.685	10.7317	6.84286	26.3833	12.72	22.36	2.52	5.77	12.08	18.68	7.28	5.82	4.5	22.18	14.65	10.34	3.38	2.3	7.36	4.27	6.25	8.99	31.24	0	2.51	23.93	0	7.63	0	19.06	0	0	0	2.59	4.65	0	0
492	GRMZM2G416667	6	140341420	140383003	CRN_2016SY	140298004	SNP_6_140298004	LOC_Os07g49270.1	AMP deaminase, putative, expressed	155.213	92.187	28.854	35.86	9.85833	5.13857	13.19	140.41	32.83	232.29	156.98	391.93	203.1	199.39	199.91	163.74	58.78	268.84	109.41	92.74	152.57	166.94	132.84	70.18	20.96	49.6	163.13	133.9	46.19	132.34	63.61	63.16	47.64	92.99	198.57	199.29	42.03	122.6	80.59	105.76
493	GRMZM5G817395	6	145041220	145045444	CRN_2015SY	145025334	SNP_6_145025334	LOC_Os05g33030.1	kinesin motor domain containing protein, putative, expressed	36.1717	23.035	74.988	94.3233	43.8192	33.94	131.265	27.57	61.98	19.11	5.21	16.2	52.42	38.5	39.62	27.92	58.7	56.92	46.44	26.98	32.09	38.34	42.43	48.35	12.31	116	0	5.54	114.79	0	43.83	0.33	133.86	3.89	0	0	11.62	1.63	3.75	4.63
494	GRMZM2G117298	6	145055935	145058814	CRN_2015SY	145025334	SNP_6_145025334	LOC_Os05g33040.1	cyclin, putative, expressed	157.38	326.161	120.997	163.215	96.7317	62.4957	133.478	201.85	135.88	217.99	272.52	246.67	225.28	127.29	137.93	83.12	144.77	145.57	129.93	113.34	97.09	105.83	160.97	152.82	133.99	188.93	783.12	590.17	174.14	635.57	367.2	596.29	257.44	148.52	383.97	336.83	272.16	295.11	190.03	264.29
495	GRMZM2G047607	6	146606085	146609617	CRN_Mean	146642094	SNP_6_146642094	LOC_Os05g33850.1	UBA/TS-N domain containing protein, expressed	52.8711	58.1125	56.863	60.1817	79.3992	117.276	65.9	47.76	51.25	54.12	74.32	51.33	58.79	50.13	57.36	30.51	50.6	52.22	52.87	71.99	54.5	50.24	45.38	51.39	46.92	71.93	66.2	59.72	59.79	51.06	44.15	57.07	52.3	48.56	38.22	37.22	43.59	57.03	60.68	67.72
496	GRMZM2G025074	6	146654815	146668070	CRN_Mean;CRN_2016SY	146642094	SNP_6_146642094;SNP_6_146692801	LOC_Os10g16440.1	CUE domain containing protein, expressed	91.4811	105.069	131.61	125.525	244.388	406.324	111.237	69.27	49.68	79.92	86.14	93.93	61.72	97.77	122.35	57.85	60.13	83.12	91.53	143.96	127.63	117.28	81.21	114.76	108.41	70.01	83.42	60.47	60.97	91.54	43.82	104.1	55.54	101.86	66.73	82.28	74.89	114.33	140.3	130.15
497	GRMZM2G024264	6	146669647	146672066	CRN_Mean;CRN_2016SY	146642094	SNP_6_146642094;SNP_6_146692801	LOC_Os05g33880.1	cysteine proteinase inhibitor precursor protein, putative, expressed	414.584	472.2	466.176	289.457	483.172	277.926	416.133	324.17	154.06	575.57	609.03	310.74	431.58	435.07	441.05	282.02	176.4	420.4	389.9	596.85	480.6	459.46	474.08	486.94	414.59	281.2	431.27	360.86	244.94	401.03	451.36	398.03	265.88	686.8	775.84	564.94	509.38	643.41	467.18	400.62
498	GRMZM2G141208	6	146690879	146696321	CRN_Mean;CRN_2016SY	146642094	SNP_6_146642094;SNP_6_146692801	LOC_Os05g33890.1	microtubule associated protein, putative, expressed	19.9794	14.996	28.481	72.0233	48.4633	62.9457	78.4833	20.44	26.46	21.26	8.91	19.6	36.36	22.73	18.2	18.68	22.82	47.37	15.95	4.3	10.33	14.68	21.81	13.09	16.64	76.79	3.88	8.07	85.23	3.56	26.45	2.7	69.17	0	3.81	4.36	8.59	0	0	0
499	GRMZM2G141205	6	146698068	146698763	CRN_2016SY	146692801	SNP_6_146692801	LOC_Os05g08570.3	OsIAA15 - Auxin-responsive Aux/IAA gene family member, expressed	0.04	0.1475	0	0	0	0	0	0	0	0	0	0	0	0	0	0	0	0	0	0	0	0	0	0.72	0	2.95	0	0	0	0	0	0	0	0	0	0	0	0	0	0
500	GRMZM2G141202	6	146699188	146700702	CRN_2016SY	146692801	SNP_6_146692801	LOC_Os05g33920.1	pentatricopeptide, putative, expressed	2.81111	1.605	4.927	3.98833	5.28833	5.21571	7.30833	3.86	5.39	1.8	0.86	2.87	4.03	3.15	3.16	1.64	4.81	2.63	2.84	1.59	3.3	2.02	2.46	1.85	2.34	6.53	0	0	3.15	0	1.2	0	1.76	0	0	1.7	1.7	0	0	0
501	GRMZM2G058472	6	148164946	148170153	CRA_2016SY	148174670	SNP_6_148174670	LOC_Os01g65780.1	glycosyl transferase, putative, expressed	148.682	140.988	81.994	49.2667	51.7158	7.45143	39.8317	219.73	54.3	255.93	476.72	186.33	231.04	119.27	108.65	58.84	66.21	82	123.67	191.58	101.2	131.66	130.45	118.31	20.39	289.43	346.85	220.92	101.1	114.41	40.65	218.94	16.36	153.24	211.26	157.88	71.8	77.18	63.6	89.63
502	GRMZM2G141792	6	149985798	149987151	CRN_2017SY;CRN_Mean	150020790	SNP_6_150020790;SNP_6_150020790	LOC_Os05g37350.1	hhH-GPD superfamily base excision DNA repair protein, expressed	4.37833	2.788	10.204	13.4733	10.0108	4.05286	30.37	0.62	4.73	0	0.77	0	1.86	4.02	4.57	3.2	5.7	3.49	3.57	2.72	9.17	6.26	9.73	7.38	11.02	5.62	1.58	0.85	11.93	0	6.45	3.92	12.4	0	2.94	1.4	4.86	0	0	0
503	GRMZM2G131733	6	150015193	150017595	CRN_2017SY;CRN_Mean	150020790	SNP_6_150020790;SNP_6_150020790	LOC_Os05g37340.1	expressed protein	13.4611	27.367	29.691	60.925	29.285	13.8514	81.5433	7.31	21.18	4.35	4.91	9.84	26.78	9.47	7.81	6.99	28.92	9.2	11.69	4.59	5.79	5.2	12.94	9.03	56.3	53.21	13.79	21.67	57.54	6.78	77.19	12.51	77.28	9.81	42.38	44.77	91.02	7.73	3.14	9.27
504	GRMZM2G131756	6	150018275	150029231	CRN_2017SY;CRN_Mean	150020790	SNP_6_150020790;SNP_6_150020790	LOC_Os05g37350.1	hhH-GPD superfamily base excision DNA repair protein, expressed	27.0522	31.2935	68.188	99.32	66.9508	35.3257	235.038	13.38	25.38	9.83	10.37	13.73	15.78	22.43	24.67	17.42	39.2	19.96	18.33	14.49	39.28	41.14	47.87	42.12	71.56	44.18	25.78	22.36	100.29	17.42	41.39	24.98	97.64	19.1	33.23	39.81	55.91	17.83	10.95	11.94
505	GRMZM2G063961	6	150654910	150660102	CRD_2016SY	150685316	SNP_6_150685316	LOC_Os01g64970.1	CAMK_CAMK_like.11 - CAMK includes calcium/calmodulin depedent protein kinases, expressed	117.913	111.645	241.554	157.473	322.429	674.181	47.955	80.91	49.14	93.83	74.64	179.12	110.15	119.45	149.15	84.94	68.06	104.13	107.4	119.19	175.84	153.06	167.09	206.96	79.38	53.69	71.8	56.15	164.59	29.92	153.57	52.42	127.47	110.73	136.84	166.76	376.42	72.32	104.11	88.02
506	GRMZM2G118037	6	150703739	150713662	CRD_2016SY	150685316	SNP_6_150685316	LOC_Os05g35740.1	subtilisin N-terminal Region family protein, expressed	719.248	867.851	1112.83	557.437	1359.89	2348.44	737.868	661.72	522.23	770.91	669.85	678.53	601.32	795.68	817.27	489.49	650.01	653.38	659.05	874.54	765.42	724.02	845.08	740.72	1027.24	592.27	622.18	383.92	377.35	628.95	450.13	637.4	339.8	1203.8	759.65	679.35	596	1321.68	1323.06	1042.12
507	GRMZM2G011169	6	150714627	150720334	CRD_2016SY	150685316	SNP_6_150685316	LOC_Os05g35730.1	hydrolase, alpha/beta fold family domain containing protein, expressed	37.2989	51.99	55.301	29.4017	46.0492	50.1443	16.3783	34.64	20.21	35.29	58.28	24.19	29.55	45.69	46.77	27.22	23.88	36.42	37.9	61.26	37.21	40.11	33.2	36.71	42.85	31.71	60.85	45.39	21.24	41.43	41.92	95.38	30.5	53.16	40.39	29.75	34.08	62.96	60.2	75.06
508	GRMZM2G011222	6	150722187	150727671	CRD_2016SY	150685316	SNP_6_150685316	LOC_Os05g35720.1	transmembrane protein 18, putative, expressed	78.9083	47.44	78.212	69.14	70.9792	54.3029	98.1183	81.11	149.96	77.01	59.07	69.54	104.8	77.23	80.9	51.12	104.65	65.38	57.92	48.96	74.21	78.34	93.92	79.04	67.19	94.97	31.85	37.91	81.07	35.48	77.48	27.14	83.33	28.42	49.59	46.61	66.33	57.81	29.51	31.54
509	GRMZM5G804356	6	150927337	150927565	CRN_2017SY	150968433	SNP_6_150968433			0	0	0	0	0	0	0	0	0	0	0	0	0	0	0	0	0	0	0	0	0	0	0	0	0	0	0	0	0	0	0	0	0	0	0	0	0	0	0	0
510	GRMZM2G066153	6	150930474	150933485	CRN_2017SY	150968433	SNP_6_150968433	LOC_Os05g35480.1	anthranilate phosphoribosyltransferase, putative, expressed	71.1883	32.8385	63.967	90.5983	170.02	254.241	105.112	77.57	113.03	59.56	56.69	81.96	93.71	62.55	66.32	44.13	93.98	56.12	64.13	53.81	49.38	55.67	70.2	55.88	126.7	104.12	6.68	20.2	113.34	1.13	118.35	5.32	96.96	7.18	23.07	25.43	90.82	4.54	2.37	2.09
511	AC194828.3_FG004	6	150935119	150935916	CRN_2017SY	150968433	SNP_6_150968433			1.03056	2.214	0	0	0	0	0	0	0	0	0	0	0	0	0	0	0	0	0	0	0	3.47	0	9.1	5.98	0	0	0	0	0	0	0	0	0	0	0	0	0	0	0
512	GRMZM2G066189	6	150936398	150940145	CRN_2017SY	150968433	SNP_6_150968433			39.46	29.3115	56.019	38.67	82.7192	180.931	53.91	34.35	73.18	25.04	24.82	26.49	32.53	31.1	35.27	19.21	66.36	30.26	30.78	27.37	50.52	49.3	53.72	42.75	57.23	51.34	16.91	21.14	62.66	16.79	37.22	28.55	51.73	23.49	3.05	11.47	19.3	12.55	10.73	35.67
513	GRMZM2G066225	6	150945761	150949276	CRN_2017SY	150968433	SNP_6_150968433	LOC_Os05g37900.1	zinc finger, C3HC4 type domain containing protein, expressed	36.0394	31.0815	32.874	110.038	98.7367	241.396	96.0633	38.88	52.82	41.93	26.77	58.96	36.07	35.54	37.42	26.3	53.76	34.06	35.01	8.68	25.55	30.43	49.91	33.24	23.38	65.91	13.87	25.83	82.41	0	63.39	4.49	125.51	1.93	42.46	65.19	126.95	0	0	0
514	GRMZM2G067036	6	150967100	150972407	CRN_2017SY	150968433	SNP_6_150968433	LOC_Os05g37910.1	phosphatidic acid phosphatase-related, putative, expressed	223.859	109.112	187.281	173.57	253.375	286.866	178.103	164.3	247.65	170.03	174.32	134.07	243.02	230.5	255.57	154.75	321.1	254.51	201.3	270.53	321.82	304.53	243.25	172.34	165.87	190.24	82.63	73.76	214.41	52.53	123.59	57.32	85.25	94.72	80.43	81.59	94.93	133.85	127.21	106.05
515	GRMZM2G067117	6	150973188	150973749	CRN_2017SY	150968433	SNP_6_150968433	LOC_Os03g62010.1	harpin-induced protein 1 domain containing protein, expressed	0	0	0	0	0	0	0	0	0	0	0	0	0	0	0	0	0	0	0	0	0	0	0	0	0	0	0	0	0	0	0	0	0	0	0	0	0	0	0	0
516	GRMZM2G701192	6	150982707	150982976	CRN_2017SY	150968433	SNP_6_150968433			0	0	0	0	0	0	0	0	0	0	0	0	0	0	0	0	0	0	0	0	0	0	0	0	0	0	0	0	0	0	0	0	0	0	0	0	0	0	0	0
517	GRMZM2G067156	6	150997417	151000157	CRN_2017SY	150968433	SNP_6_150968433	LOC_Os05g37930.1	expressed protein	174.195	127.865	251.531	389.663	196.9	81.1457	137.1	164.69	193.68	142.8	138.34	243.28	165.77	133.84	170.63	104.41	174.44	146.4	173.17	146.4	168.72	201.65	265.84	243.43	158.02	185.06	91.62	154.75	396.66	40.53	335.07	61.83	309.11	37.23	134.36	171.08	266.98	99.27	57.23	11.47
518	GRMZM2G001332	6	157518059	157518917	CRN_2016SY	157544999	SNP_6_157544999			126.123	17.4855	8.965	150.605	0.103333	0	3.475	46.9	3.06	156.33	98.98	0	43.37	197.73	184.36	123.18	56.89	272.76	165.83	254.34	287.74	246.37	74.95	57.42	0	29.53	16.27	29.02	0	17.96	0	11.12	0	72.01	6.94	0	0	14.86	23.95	36.78
519	GRMZM2G483043	6	157520279	157523200	CRN_2016SY	157544999	SNP_6_157544999			0.158889	0.297	0	2.095	0	0	0	0	0	0	0	0	2.86	0	0	0	0	0	0	0	0	0	0	0	0	5.94	0	0	0	0	0	0	0	0	0	0	0	0	0	0
520	GRMZM2G007708	6	157544245	157544990	CRN_2016SY	157544999	SNP_6_157544999	LOC_Os06g45290.1	pollen allergen, putative, expressed	0	0	0	3354.76	2.76083	0	0	0	0	0	0	0	0	0	0	0	0	0	0	0	0	0	0	0	0	0	0	0	0	0	0	0	0	0	0	0	0	0	0	0
521	GRMZM2G005643	6	157563274	157564427	CRN_2016SY	157544999	SNP_6_157544999	LOC_Os06g45160.1	pollen allergen, putative, expressed	0	0	0	974.342	0.713333	0	0	0	0	0	0	0	0	0	0	0	0	0	0	0	0	0	0	0	0	0	0	0	0	0	0	0	0	0	0	0	0	0	0	0
522	GRMZM2G005818	6	157575080	157576191	CRN_2016SY	157544999	SNP_6_157544999	LOC_Os05g43030.1	expressed protein	2.07167	1.678	2.942	6.63	0.213333	0	4.16167	1.53	0	0	0	2.4	8.18	5.17	2.84	1.45	4.41	2.42	4.29	0	0	1.52	1.69	1.39	0	3.35	0	0	7.79	0	7.06	0	11.97	0	0	0	3.39	0	0	0
523	GRMZM2G032847	6	158057609	158060000	CRN_Mean	158107409	SNP_6_158107409	LOC_Os05g43440.1	single-stranded DNA-binding protein, putative, expressed	65.4511	41.61	82.705	96.8617	109.167	186.639	212.333	66.87	147.95	49.77	30.22	41.57	93.93	56.3	63.84	40.37	116.71	72.64	48.26	24.81	85.82	59.71	81.94	52.99	44.42	127.15	15.12	18.15	82.48	41.43	50.09	18.37	82.53	22.07	21.6	47.94	38.36	12.35	14.74	20.68
524	GRMZM2G049091	6	158082951	158087562	CRN_Mean	158107409	SNP_6_158107409	LOC_Os05g43450.1	transcription initiation factor IIF beta subunit, putative, expressed	121.41	97.389	119.494	99.5367	156.097	236.55	111.887	128.61	178.83	117.63	99.59	110.99	143.63	126.51	128.44	86.57	161.44	95.36	105.32	94.72	118.75	119.87	125.79	113.38	129.95	144.17	80.61	79.68	100.98	111.97	128.56	84.45	122.27	91.78	55.07	77.86	86.1	112.6	77.9	100.83
525	GRMZM2G138067	6	158101986	158103004	CRN_Mean	158107409	SNP_6_158107409	LOC_Os05g43460.1	DUF567 domain containing protein, putative, expressed	44.7539	397.32	142.71	36.63	29.2417	16.1786	57.51	54.06	55.11	57.61	58.51	13.29	98.37	43.65	37.54	25.63	50.88	21.43	31.32	76.18	30.57	27.8	36.77	22.36	64.49	185.83	445.86	249.31	91.77	428.77	58.75	589.86	59.66	1175.59	335.22	194.86	137.87	806.75	822.16	544.85
526	GRMZM2G138076	6	158104833	158109972	CRN_Mean	158107409	SNP_6_158107409	LOC_Os05g43470.1	outer membrane protein, OMP85 family, putative, expressed	32.5	27.7605	41.437	25.98	22.7908	15.4971	40.6067	32.65	43.36	34.91	25.62	55.47	36	26.56	31.13	20.14	37.69	35.7	30.59	25.07	32.75	34.19	27.63	30.31	25.23	25.76	21.41	24.48	35.82	33.15	32.7	27.43	27.43	24.63	13.12	12.84	15.27	16.78	31.92	29.71
527	GRMZM2G105401	6	159784269	159785198	CRN_2017SY	159822451	SNP_6_159822451	LOC_Os07g46620.1	WD repeat-containing protein 55, putative, expressed	0.0977778	0	4.859	0	0.451667	0	0	0	0	0	0	0	0	0	0	0	0	0	0	0	0	0	1.76	0	0	0	0	0	0	0	0	0	0	0	0	0	0	0	0	0
528	GRMZM2G077278	6	159785916	159790437	CRN_2017SY	159822451	SNP_6_159822451	LOC_Os05g45420.1	CAMK_KIN1/SNF1/Nim1_like_AMPKh.3 - CAMK includes calcium/calmodulin depedent protein kinases, expressed	211.617	355.512	526.464	198.568	434.06	729.736	410.502	194.42	163.05	217.57	257.64	198.88	179.44	202.39	240.89	126.84	171.35	197.36	181.37	268.1	254.78	247.66	257.55	302.06	147.75	190.62	180.27	152.1	161	284.74	129.27	282.98	119.61	324.34	167.83	144.4	94.95	635.7	667.38	448.17
529	AC206165.3_FG007	6	159812447	159814105	CRN_2017SY	159822451	SNP_6_159822451	LOC_Os05g45410.1	HSF-type DNA-binding domain containing protein, expressed	4.65833	11.9145	5.856	0.13	0	0	0	3.22	0	5.15	5.84	0.76	0	10.16	11.64	4.1	0	4.81	7.58	17.31	3.61	5.98	1.07	2.62	0	0	0	0	0	5.91	0	1.38	0	19.12	0	0	0	24.84	23.14	36.07
530	GRMZM2G105473	6	159818618	159823144	CRN_2017SY	159822451	SNP_6_159822451	LOC_Os05g45400.1	expressed protein	107.608	1091.36	211.477	138.107	118.127	147.143	59.445	77.46	39.28	87.55	78.25	111.1	54.85	134.71	159.75	75.06	51.44	83.72	102.49	182.35	169.38	155.85	106.09	163.85	103.77	65.78	939.94	379.25	60.17	897.29	60.25	1255.65	57.81	1771.53	228.12	174.04	90.72	2148.1	1904.88	2733.43
531	AC206165.3_FG009	6	159827389	159827766	CRN_2017SY	159822451	SNP_6_159822451	LOC_Os05g45380.1	expressed protein	0.806667	0	0	0	0	0	0	0	0	0	0	0	7.62	0	0	0	0	0	0	0	0	2.33	0	4.57	0	0	0	0	0	0	0	0	0	0	0	0	0	0	0	0
532	AC206165.3_FG019	6	159858828	159860325	CRN_2017SY	159822451	SNP_6_159822451			1.16222	2.1015	0.743	0.438333	0	0.107143	0	2.76	0	1.41	3.94	0.8	0	3.08	2.02	0.71	0	0	0	4.59	0	0	0	0.42	1.19	10.2	1.48	1.63	0	0	1.67	2.45	0.74	0	0	0	1.49	0	0	0
533	GRMZM2G004828	6	162840182	162841982	CRA_Mean	162885597	SNP_6_162885597	LOC_Os05g47690.1	reticulon domain containing protein, putative, expressed	165.651	26.51	39.181	24.7317	9.45583	0	0	198.37	6.17	342.99	2.44	1152.64	178.7	147.01	120.37	112.03	13.48	178.59	92.25	95.55	51.55	80.55	121.76	61.79	25.48	42.85	6.16	26.21	110.96	0	125.92	1.54	97.23	0	0	2.84	116.49	0	0	0
534	GRMZM2G004909	6	162843435	162844175	CRA_Mean	162885597	SNP_6_162885597	LOC_Os05g47700.1	LTPL152 - Protease inhibitor/seed storage/LTP family protein precursor, expressed	2211.84	351.233	348.952	75.8483	39.4825	0	1.20667	2295.9	86.29	5669.68	80.72	10121.5	3254.64	1928.37	1998.31	1499.11	198.36	3084.83	1646.59	1603.97	1392.32	1759.91	2120.08	1058.5	14.01	191.01	72.7	45.34	39.1	205.7	61.59	260.23	60.99	1008.88	876.75	736.34	72.57	940.32	619.21	535.74
535	GRMZM2G306255	6	162846251	162848017	CRA_Mean	162885597	SNP_6_162885597	LOC_Os03g30510.1	expressed protein	0.577778	2.356	0.446	1.53	0.0575	0.274286	0.256667	0.73	0.61	1.09	3.08	0.6	0	0	0.34	0	1.89	0	0.48	0.64	0	0.28	0.24	0	0.42	1.58	5.64	6.17	0	0	1.87	11.82	1.59	0	0	0	2.56	0	0	0
536	GRMZM2G320373	6	162859289	162860116	CRA_Mean	162885597	SNP_6_162885597	LOC_Os05g47730.1	LTPL153 - Protease inhibitor/seed storage/LTP family protein precursor, expressed	182.609	60.5145	151.148	19.35	11.8	0	14.4917	96.33	4.26	268.49	1.71	427.55	109.97	139.56	203.15	62.19	4.93	60.31	85.17	187.02	354.03	326.68	240.94	239.08	475.59	101.63	21.23	26.77	48.83	10.93	153.2	12.93	67.11	15.88	341.28	189.17	54.98	0	0	27.44
537	GRMZM5G872417	6	162862269	162867072	CRA_Mean	162885597	SNP_6_162885597	LOC_Os05g51650.1	LSM domain containing protein, expressed	192.731	167.379	242.851	229.26	308.953	454.117	380.1	178.92	281.32	157.44	124.24	143.59	203.74	157.59	179.12	110.32	247.32	179.07	162.65	149.89	226.99	212.08	256.56	222.46	275.86	303.46	113.07	122.96	282.92	153.72	200.41	161.46	234.1	135.6	95.3	112.55	142.93	122.07	152.7	172.1
538	GRMZM2G017157	6	162869903	162873650	CRA_Mean	162885597	SNP_6_162885597	LOC_Os01g49529.1	OsWAK10d - OsWAK receptor-like cytoplasmic kinase OsWAK-RLCK, expressed	0.258333	1.054	6.422	0.771667	0	0	0	0	0	0	0	0	0	0	0	0	0	0	0	0	3.06	0.85	0.74	0	0	0	7.97	2.87	1.74	0	0	0	0	0	0	0	7.04	0	0	0
539	GRMZM2G320399	6	162879353	162886738	CRA_Mean	162885597	SNP_6_162885597	LOC_Os01g49470.1	E3 ubiquitin ligase, putative, expressed	99.2506	94.1645	105.395	81.6467	67.0417	66.8471	25.805	69.82	21.43	86.26	44.11	181.3	111.75	53.85	67.02	41.27	29.78	130.72	90.85	85.18	274.62	256.12	114.85	85.58	42	42.85	167.17	134.85	57.12	198.56	71.62	132.26	74.44	75.4	62.46	53.47	68.56	126.55	106.81	95.76
540	GRMZM2G017269	6	162887447	162890818	CRA_Mean	162885597	SNP_6_162885597	LOC_Os08g42189.2	expressed protein	65.1717	43.373	65.839	70.69	82.985	94.43	71.28	70.93	124.58	50.07	57.07	50.73	81.49	55.66	53.08	35.18	107.75	50.51	62.82	42.01	61.83	60.79	65.75	71.04	71.8	109.77	29.01	40.75	88.83	36.43	96.66	18.34	76.04	21.84	23.76	35.5	74.55	25.9	20.17	30.67
541	GRMZM2G083477	6	162893120	162894293	CRA_Mean	162885597	SNP_6_162885597	LOC_Os01g49440.1	expressed protein	0.182778	3.409	0	0	0	0	0	0	0	0	0	0	0	0	0	0	0	0	0	0	0	0	0	3.29	0	0	0	0	0	0	0	0	0	5.03	14.87	5.31	0	42.97	0	0
542	GRMZM2G329645	6	162919981	162920655	CRA_Mean	162885597	SNP_6_162885597	LOC_Os05g47820.1	expressed protein	0	0	0	0	0	0	0	0	0	0	0	0	0	0	0	0	0	0	0	0	0	0	0	0	0	0	0	0	0	0	0	0	0	0	0	0	0	0	0	0
543	GRMZM2G025518	6	162923432	162924721	CRA_Mean	162885597	SNP_6_162885597	LOC_Os05g47830.1	expressed protein	3.05389	25.2125	7.586	16.4367	12.12	18.3714	6.08667	0	0	0	0	2.43	0	9.75	8.99	5.07	0	0	1.81	8.48	2.87	8.67	2.61	2.8	1.49	1.27	35.26	19.02	8.18	45.88	1.74	58.58	2.8	28.65	0	0	0	74.03	37.9	57.54
544	GRMZM2G369266	7	2872688	2874871	CRN_Mean	2923512	SNP_7_2923512	LOC_Os07g02480.1	expressed protein	8.17389	0	0	0	0	0	0.795	0	3.3	0	0	0	2.16	9.69	11.34	5.85	22.24	17.1	26.58	5.4	14.1	17.21	7.35	4.81	0	0	0	0	0	0	0	0	0	0	0	0	0	0	0	0
545	GRMZM2G067946	7	2877230	2877934	CRN_Mean	2923512	SNP_7_2923512	LOC_Os02g25780.1	expressed protein	0.628333	0	0	0	0	0	0	0	0	0	0	0	0	0	0	0	0	0	0	0	6	2.31	0	3	0	0	0	0	0	0	0	0	0	0	0	0	0	0	0	0
546	GRMZM2G369284	7	2894079	2894784	CRN_Mean	2923512	SNP_7_2923512	LOC_Os07g02890.1	OsFBX209 - F-box domain containing protein, expressed	0	0	0	0	0	0	0	0	0	0	0	0	0	0	0	0	0	0	0	0	0	0	0	0	0	0	0	0	0	0	0	0	0	0	0	0	0	0	0	0
547	GRMZM2G470010	7	2917760	2919679	CRN_Mean	2923512	SNP_7_2923512	LOC_Os08g24750.1	xyloglucan fucosyltransferase, putative, expressed	39.9356	2.9575	0	0.181667	0	0	0	61.36	81.86	22.67	71.12	0	11.96	46.23	33.86	24.96	76	22.77	54.06	41.04	54.38	58.28	22.77	21.63	13.89	1.58	0	0	0	0	1.27	0	0	0	8.85	25.33	22.12	0	0	0
548	GRMZM2G145654	7	2954927	2955882	CRN_Mean	2923512	SNP_7_2923512	LOC_Os07g03120.1	expressed protein	1.27833	7.9965	2.896	9.3	13.2825	0	26.0817	0	0	0	0	0	0	0	0	0	0	0	0	0	0	0	0	0	23.01	6.4	0	11.95	23.2	0	74.51	0	28.33	0	0	0	15.54	0	0	0
549	GRMZM2G145633	7	2960526	2964318	CRN_Mean	2923512	SNP_7_2923512	LOC_Os07g03130.1	PDV2, putative, expressed	40.4239	61.9735	144.245	108.317	188.185	283.5	351.857	24.62	26.6	34.52	24.15	23.27	22.89	25.54	27.34	15.54	28.97	32.41	24.99	30.52	55.44	50.18	79.09	103.72	97.84	40.39	20.93	34.91	119.53	27.06	76.64	41.47	89.72	49.02	45.37	76.58	86.85	65.54	84.35	72.73
550	GRMZM2G350205	7	2964980	2970585	CRN_Mean	2923512	SNP_7_2923512	LOC_Os07g03140.1	ternary complex factor MIP1, putative, expressed	45.505	27.003	62.795	40.0617	45.9858	2.90143	47.5183	41.97	51.5	41.84	44.48	62.73	39.26	39.35	43.05	22.71	60.61	31.08	29.77	42.56	52.52	52.15	52.17	53.81	57.53	29.48	3.02	21.08	36.65	12.84	100.4	1.55	113.88	10.61	14.97	27.47	109.82	13.97	8.11	8.4
551	GRMZM2G070399	7	10075850	10076302	CRN_2016SY	10115216	7:10115216			0	0	0	0.873333	368.261	182.266	13.2167	0	0	0	0	0	0	0	0	0	0	0	0	0	0	0	0	0	0	0	0	0	0	0	0	0	0	0	0	0	0	0	0	0
552	GRMZM2G161035	7	10113380	10118309	CRN_2016SY;CRD_2016SY	10115216	7:10115216;SNP_7_10166816	LOC_Os02g02410.1	DnaK family protein, putative, expressed	16.4856	12.064	10.649	9.29333	11.0692	12.0986	9.345	19.11	39.01	7.62	10.59	8.5	32.49	15.59	15.29	9.98	32.64	11.31	17.15	6.6	13.44	12.44	13.36	13.18	18.44	36.45	2.75	8.34	11.87	8.14	31.98	5.69	18.15	11.18	13.79	8.55	8.61	6.79	4.86	15.52
553	GRMZM2G161097	7	10170663	10171849	CRD_2016SY	10166816	SNP_7_10166816	LOC_Os05g19670.1	Cupin domain containing protein, expressed	73.8444	155.298	20.226	50.5233	15.0592	0	8.52333	88.11	4.65	120.79	2.66	359.38	98.74	86.58	69.52	53.46	18.81	41.56	89.26	88.07	40.69	55.37	48.71	45.11	17.73	58.83	104.32	115.91	26.98	21.49	135.55	0	115.8	0	296.93	1377.98	852.16	0	0	0
554	GRMZM2G334041	7	11151804	11157815	CRD_2016SY	11192612	SNP_7_11192612	LOC_Os07g08500.1	C-5 cytosine-specific DNA methylase, putative, expressed	48.0117	32.242	54.02	102.087	86.8008	139.757	109.603	58.01	104.27	36.07	34.3	41.18	75.44	39.33	38.79	31.69	95.18	58.4	46.14	18.36	35.06	38.3	38.37	31.98	43.34	159.42	12.16	19.85	121.27	8.55	54.5	6.42	123.6	5.08	8.73	12.2	30.29	11.4	11.75	7.47
555	AC211651.4_FG001	7	11189395	11195454	CRD_2016SY	11192612	SNP_7_11192612	LOC_Os02g02410.1	DnaK family protein, putative, expressed	14.6378	13.5395	11.556	11.5033	12.7392	14.8143	12.1567	16.75	36.86	6.68	9.28	7.24	29.89	12.99	13.39	9.36	28.18	10.93	14.31	6.21	10.72	12.11	11.22	10.48	16.88	50.78	4.15	9.92	13.9	9.04	34.46	6.64	20.44	9.83	9.79	9.95	17.67	8.09	9.65	13.02
556	GRMZM2G095078	7	19265565	19270520	CRD_Mean	19289197	SNP_7_19289197	LOC_Os07g10890.1	transcription factor, putative, expressed	31.0839	38.7775	59.497	58.8317	80.5983	131.73	56.9667	20.23	22.77	20.35	18.6	36.82	29.08	24.05	29.63	11.72	26.65	28.26	29.83	26.84	43.24	47.37	49.88	50.35	43.84	44.91	17.79	20.71	71.77	22.8	44.38	18.97	46.33	21.49	27.66	36.43	40.43	54.18	46.56	35.57
557	GRMZM2G042627	7	19331382	19358462	CRD_Mean	19289197	SNP_7_19289197	LOC_Os07g11010.1	protein Kinase-associated protein phosphatase, putative, expressed	51.2278	56.43	54.092	98.1733	107.014	163.939	90.2433	55.24	66	49.91	63.86	47	47.2	47.79	51.58	32.38	54.25	45.74	43.03	43.55	46.37	48.8	56.29	57.68	65.43	52.06	59.71	60.16	81.29	59.46	54.9	87.76	68.71	53.28	63.95	64.77	60.3	50.01	39.88	43.85
558	GRMZM2G571942	7	92317051	92335474	CRD_2015SY	92360549	SNP_7_92360549			0	0	0	0	0	0	0	0	0	0	0	0	0	0	0	0	0	0	0	0	0	0	0	0	0	0	0	0	0	0	0	0	0	0	0	0	0	0	0	0
559	GRMZM2G315431	7	103904514	103907063	CRA_2016SY	103946580	SNP_7_103946580	LOC_Os09g21120.1	armadillo/beta-catenin repeat family protein, putative, expressed	10.5328	6.572	55.774	1.785	6.41333	0.0542857	21.2783	5.05	0	19.15	19.35	1.92	0	18.33	11.47	3.3	0.62	2.76	9.71	59.75	0.97	1.65	0.75	9.41	25.4	2.95	0	0	0	0	0	7.09	0	42.18	17.07	8.85	1.07	20.14	7.34	6.74
560	AC198379.3_FG006	7	103950635	103953501	CRA_2016SY	103946580	SNP_7_103946580	LOC_Os01g73070.2	expressed protein	0	0	0	0	0	0	0	0	0	0	0	0	0	0	0	0	0	0	0	0	0	0	0	0	0	0	0	0	0	0	0	0	0	0	0	0	0	0	0	0
561	GRMZM2G175910	7	103973890	103975639	CRA_2016SY	103946580	SNP_7_103946580	LOC_Os09g16030.1	cytokinin-O-glucosyltransferase 1, putative, expressed	30.7717	3.6565	13.077	18.71	7.6725	0.214286	8.42333	47.18	29.8	53.34	70.78	67.14	10.76	23.89	34.14	15.96	14.01	13.97	24.36	47.68	9.03	12.68	15.51	18.48	45.18	20.01	0	0	38.47	0	2.13	0	9.71	0	0	0	0	0	0	0
562	GRMZM2G082264	7	107261176	107267803	CRA_2016SY	107264341	7:107264341	LOC_Os09g23200.1	KANADI1, putative, expressed	2.99667	17.4185	12.323	35.31	46.0533	27.9614	29.3667	1.33	2.21	1.11	1.25	1.85	0	5.26	5.92	3.78	8.15	5.79	4.19	3.97	2.28	2.98	2.65	0.81	0.41	11.91	14.96	13.17	13.68	10.96	14.89	12.44	18.8	9.68	8.72	17.41	22.08	28.31	24.25	17.01
563	GRMZM5G826321	7	126840182	126841733	CRA_Mean;CRA_2015SY	126858169	SNP_7_126858169;SNP_7_126858227	LOC_Os09g28720.1	alpha/beta hydrolase fold, putative, expressed	91.3822	45.201	90.861	84.51	100.1	2.68143	60.0267	113.07	72.13	165.34	117.62	146.03	46.7	100.07	99.28	55.97	45.84	60.65	56.59	66.76	84.52	79.82	116.38	114.08	104.03	53.81	5.35	23.27	43.85	10.5	103.61	19.32	101.24	26.72	91.73	116.08	133.9	25.77	32.43	8.57
564	GRMZM2G140909	7	126864350	126866304	CRA_Mean;CRA_2015SY	126858169	SNP_7_126858169;SNP_7_126858227	LOC_Os09g28720.1	alpha/beta hydrolase fold, putative, expressed	0.0783333	23.2575	2.447	1.45667	0.215	0	0	0	0	0	0	0	0	0	0.75	0	0	0	0	0.66	0	0	0	0	0	0.51	25.59	13.22	0	21.24	0	53.86	0	59.08	0	0	0	53.85	43.29	39.93
565	GRMZM5G897362	7	126892379	126893139	CRA_Mean;CRA_2015SY	126858169	SNP_7_126858169;SNP_7_126858227			0	0	0	0	0	0	0	0	0	0	0	0	0	0	0	0	0	0	0	0	0	0	0	0	0	0	0	0	0	0	0	0	0	0	0	0	0	0	0	0
566	GRMZM2G356628	7	132573709	132575548	CRA_2016SY	132623788	SNP_7_132623788	LOC_Os02g46140.2	OsFBX59 - F-box domain containing protein, expressed	0	0	0	0	0	0	0	0	0	0	0	0	0	0	0	0	0	0	0	0	0	0	0	0	0	0	0	0	0	0	0	0	0	0	0	0	0	0	0	0
567	GRMZM2G084014	7	132622754	132628125	CRA_2016SY	132623788	SNP_7_132623788	LOC_Os08g39390.1	ZOS8-10 - C2H2 zinc finger protein, expressed	0.637222	6.0645	3.677	7.61667	2.43833	0	0.271667	0	0	0	0	0	0	0	0.32	0	0	0	0	0.74	1.1	0	0.9	0.64	7.77	8.1	14.87	13.97	10.71	0	2.55	2.04	2.63	13.99	30.46	5.28	0	5.28	6.11	0
568	GRMZM2G083932	7	132660263	132661562	CRA_2016SY	132623788	SNP_7_132623788	LOC_Os09g31190.1	slowmo homolog, putative, expressed	3.66889	11.805	2.814	0.24	0	0	0.308333	2.18	0	2.4	4.96	1.49	0	8.19	10.09	4.06	0	0	3.28	20.9	0	0	0	2.34	6.15	2.15	0	12.75	0	5.98	0	9.85	0	27.48	4.09	2.62	0	41.66	34.53	9.59
569	GRMZM2G083894	7	132664460	132666065	CRA_2016SY	132623788	SNP_7_132623788	LOC_Os09g31200.1	AN1-like zinc finger domain containing protein, expressed	250.745	386.538	331.532	104.85	74.2917	94.5386	108.013	257.8	103.32	323.62	391.61	168.96	363.86	279.71	373.98	176.23	83.51	187.31	221.68	614.94	201.3	193.17	160.36	218.96	193.09	204.61	204.71	203.28	76.2	203.8	90.01	142.49	50.43	1201.36	687.87	639.1	532.42	573.06	669.71	427.63
570	GRMZM2G000288	7	138128865	138130245	CRN_2017SY	138128053	SNP_7_138128053			128.292	169.928	220.778	209.1	151.994	103.834	137.815	112.79	141.43	79.63	129.29	233.68	176.97	82.55	82.6	55.03	185.6	135.67	155.67	110.91	106.64	115.06	141.82	170.44	93.48	163.62	191.28	151.35	187.93	160.68	227.37	407.97	277.01	169.79	81.78	153.56	169.59	162.4	69.95	238.43
571	GRMZM2G000264	7	138130886	138155635	CRN_2017SY	138128053	SNP_7_138128053	LOC_Os12g44150.1	plasma membrane ATPase, putative, expressed	230.977	302.644	334.792	325.165	282.714	223.25	221.233	198.29	248.71	159.39	169.7	364.89	270.83	169.71	167.49	109.18	301.65	200.97	241.32	184.35	227.69	215.13	340.82	279.39	308.08	274.64	411.99	281.04	252.72	320.58	309.69	679.28	353.87	335.34	219.14	281.25	310	309.07	232.35	391.07
572	GRMZM2G000281	7	138135236	138139605	CRN_2017SY	138128053	SNP_7_138128053	LOC_Os07g33210.1	expressed protein	0	0	0	0	0	0	0.145	0	0	0	0	0	0	0	0	0	0	0	0	0	0	0	0	0	0	0	0	0	0	0	0	0	0	0	0	0	0	0	0	0
573	GRMZM2G102243	7	146406989	146411817	CRD_2017SY	146410423	SNP_7_146410423	LOC_Os05g04950.1	protein binding protein, putative, expressed	41.1133	66.887	53.408	44.9533	63.63	85.58	39.52	38.11	33.22	34.83	47.27	49.38	29.2	44.4	46.6	29.97	38.37	35.13	40.31	54.01	44.57	43.59	47.13	48.51	35.44	33.51	100.45	54.18	41.2	65.19	43.62	109.96	44.36	80.65	54.43	52.53	52.53	85.87	72.64	100.17
574	GRMZM2G165195	7	148359030	148365877	CRN_2017SY	148363314	SNP_7_148363314	LOC_Os07g29630.1	SNF7 domain containing protein, putative, expressed	155.363	146.417	130.214	138.112	155.59	212.561	118.143	152.39	165.94	151.74	146.61	168.31	147.28	170.83	177.68	98	157.9	134.41	160.13	172.11	167.87	164.39	164.93	164.17	131.85	139.93	151.75	140.19	116.32	173.67	122.87	175.69	118.38	184.54	147.44	148.08	131.78	148.1	160.42	152.87
575	GRMZM2G075828	7	153256118	153260594	CRD_2016SY	153289091	SNP_7_153289091	LOC_Os03g37640.1	MATE efflux family protein, putative, expressed	948.417	189.543	254.052	235.477	95	0.741429	226.138	1712.71	3283.08	678.9	937.88	344.03	1587.48	773.31	814.78	569.68	1477.94	378.48	689.78	514.23	415.69	401.75	693.99	580.05	1217.74	1619.93	45.59	97.89	447.57	18.92	369.14	2.01	214.9	3.84	162.56	344.82	424.64	17.74	9.92	0
576	GRMZM2G075794	7	153288576	153290674	CRD_2016SY	153289091	SNP_7_153289091	LOC_Os07g33320.1	expressed protein	36.9222	10.378	6.368	22.155	0.194167	0	0	33.14	11.93	77.69	34.65	20.15	38.19	50.04	41.89	34.19	5.99	47.97	23.43	39.61	31.88	50.53	54.03	61.51	7.78	5.43	2.13	8.98	0	10.85	10.31	10.67	2.99	28.77	37.22	15.79	29.65	0	16.35	0
577	GRMZM2G127510	7	153320097	153324724	CRD_2016SY	153289091	SNP_7_153289091	LOC_Os07g33330.1	RNA recognition motif containing protein, putative, expressed	75.7056	69.9005	92.398	101.463	142.1	207.109	141.602	79.46	139.49	56.86	73.88	76.29	89.35	53.64	56	38.59	123.04	65.37	62.6	67.62	63.48	63.67	73.71	77.49	102.16	118.8	63.15	59.41	111.34	57.51	84.2	88.89	98.21	62.89	61.26	62.68	80.03	60.9	50.89	65.18
578	GRMZM2G127499	7	153326363	153329791	CRD_2016SY	153289091	SNP_7_153289091			0.227778	0	0	0	0	0	0	0	0	0	0	0	0	1	0.6	0	0	0	0.89	1.04	0	0	0	0.57	0	0	0	0	0	0	0	0	0	0	0	0	0	0	0	0
579	GRMZM2G429396	7	153330870	153331777	CRD_2016SY	153289091	SNP_7_153289091	LOC_Os07g33350.2	hsp20/alpha crystallin family protein, putative, expressed	84.1	13.997	7.139	0.578333	0	0	0	130.41	161.9	140.79	114.9	50.61	20.94	170.95	157.14	95.53	48.52	35.9	56.58	143.53	68.39	40.4	19.2	52.92	5.19	11.06	32.96	12.24	0	42.01	0	2.96	0	19.33	57.65	57.95	19.22	0	0	0
580	GRMZM2G006942	7	158498408	158506178	CRN_2016SY	158500335	SNP_7_158500335	LOC_Os07g38060.1	expressed protein	51.4594	49.7845	57.756	111.128	185.196	260.514	172.603	61.27	56.03	65.08	62.81	45.3	53.93	60.75	63.16	38.83	60.75	46.31	50.51	42.37	31.37	33.97	40.08	54.71	59.04	107.38	42.89	58.63	117.96	3.71	137.98	10.4	133.67	3.62	61.41	126.2	154.64	4.91	5	3.58
581	GRMZM2G086779	7	165975422	165982428	CRA_2016SY	166026010	7:166026010	LOC_Os11g19220.1	mitosis protein dim1, putative, expressed	83.1439	113.677	101.584	81.7367	69.3817	33.8343	79.4167	84.37	61.96	100.17	88.12	128.82	47.83	81.68	83.44	52.3	73.33	72.69	69.85	89.56	91.14	89.21	108.78	95.84	77.5	57.74	120.1	117.43	95.97	162.74	93.4	166.21	71.46	108.26	108.76	80.19	62.03	102.94	119.96	161.07
582	GRMZM2G086856	7	165984664	165985940	CRA_2016SY	166026010	7:166026010	LOC_Os07g42740.1	DUF1645 domain containing protein, putative, expressed	10.4372	26.594	25.466	1.4	0.404167	0	7.32	7.29	20.97	7.28	6.16	0	4.81	12.44	19.14	10.91	11.53	3.09	6.92	21.57	18.89	10.01	7.96	7.61	11.29	7.74	19.97	2.37	0	13.48	0	0	0	79.95	0	0	2	76.27	111.48	26.05
583	GRMZM2G371721	7	166025841	166029166	CRA_2016SY	166026010	7:166026010	LOC_Os07g42800.1	heat shock protein DnaJ, putative, expressed	29.8094	35.852	38.335	45.035	33.685	20.3971	60.4383	33.76	38.37	33.79	33.28	36.54	31.07	28.99	30.87	23.37	34.68	29.01	22.45	22.43	26.77	23.89	29.03	29.36	28.91	60.18	25.87	27.8	56.65	17	55.95	32.61	58.72	31.41	29.17	37.82	62.57	30.52	40.14	36.8
584	GRMZM2G148249	7	169444105	169449018	CRD_Mean	169494973	SNP_7_169494973	ChrUn.fgenesh.mRNA.85	expressed protein	8.96889	7.674	18.114	30.7833	21.505	22.0057	44.8033	8.76	11.5	11.12	7.38	8.24	8.94	7.82	9.2	7.51	11.65	11.3	7.08	4.87	7.35	6.64	13.08	9.27	9.73	26.32	2.91	3.62	37.29	3.09	6.91	5.36	28.92	1.41	3.62	6.78	5.11	0	1.71	0
585	GRMZM2G120971	7	169484381	169486976	CRD_Mean	169494973	SNP_7_169494973	LOC_Os07g44820.1	expressed protein	37.07	192.241	77.453	35.0783	21.1142	40.0771	16.1433	18.73	11.16	30.26	38.05	17.12	29.48	39.84	44.13	19.41	13.81	33.52	33	63.27	59.9	49.09	53.58	52.71	60.2	15.7	190.08	89.29	30.17	116.72	14.17	195.44	7.67	200.86	35.74	30.25	7.96	583.04	334.54	369.49
586	GRMZM2G120954	7	169492825	169497883	CRD_Mean	169494973	SNP_7_169494973	LOC_Os07g44830.1	proline-rich family protein, putative, expressed	8.68722	20.8325	18.237	38.4283	8.61333	1.75429	16.0567	9.58	15.72	4.88	5.74	3.3	8.05	10.45	8.49	6.44	12.28	12.36	14.74	3.78	4.52	5.67	8.37	5.25	16.75	31.19	14.97	10.19	44.99	8.95	47.71	10.73	91.14	0	0	3.16	46.69	25.09	15.01	10.91
587	GRMZM2G020606	7	172281379	172285988	CRA_Mean	172301300	SNP_7_172301300	LOC_Os07g47340.1	expressed protein	131.456	79.579	128.186	114.347	174.062	289.234	139.638	128.87	171.86	108.75	99.55	112.7	144.31	139.43	149.62	81.47	160.89	114.11	113.01	101.46	136.98	133.79	146.58	164.54	158.28	145.86	86.26	85.07	126.2	105.96	135.67	75.24	104.36	27.47	40.58	55.44	71.41	63.14	37.92	58.26
588	GRMZM2G020766	7	172301266	172312464	CRA_Mean	172301300	SNP_7_172301300	LOC_Os07g47350.2	potassium transporter, putative, expressed	117.266	97.4275	33.738	27.8283	33.4325	18.06	29.2367	107.99	22.44	140.45	227.63	21.24	81.16	175.07	183.62	116.53	45.23	167.68	124.8	210.2	173.12	173.58	56.64	67.97	15.44	45.21	115.79	64.74	7.69	82.52	17.64	34.66	8.38	98.96	50.13	39.85	22.11	169.04	171.34	84
589	GRMZM2G149040	7	173190014	173195685	CRD_Mean	173220992	SNP_7_173220992	LOC_Os07g48180.1	bZIP transcription factor domain containing protein, expressed	38.215	25.38	37.054	63.57	59.0292	75.1	64.375	44.92	87.56	21.05	11.93	30.21	43.38	31.68	33.02	23.45	86.36	28.97	40.39	16.58	28.1	31.05	45.18	28.72	55.32	76.99	18.13	30.07	70.81	4.38	84.23	8.4	93.83	0	13.27	31.76	73.82	0	0	0
590	GRMZM2G158162	7	173216702	173223537	CRD_Mean	173220992	SNP_7_173220992	LOC_Os07g48200.1	B3 DNA binding domain containing protein, putative, expressed	154.37	191.187	181.687	128.597	96.7717	130.916	78.17	160.28	65.11	156.2	241.68	211.34	117.23	140.74	146.95	85.05	70.38	108.25	161.7	154.27	145.25	179.71	227.43	302.92	104.17	76.98	199.98	190.9	65.96	201.74	112.93	276.53	75.63	195.2	328.78	339.23	203.76	199.14	235.02	188.16
591	GRMZM5G881387	7	173226488	173230173	CRD_Mean	173220992	SNP_7_173220992	LOC_Os07g48229.1	vacuolar-sorting receptor precursor, putative, expressed	0.795556	3.8475	0	127.207	0.148333	0	0	0.55	0	0.59	0	3	0	1.04	0.7	0.6	0	0.5	1.96	0.89	2.24	0	2.03	0.22	0	0	0	0	0	0	0	4.08	0	1.83	0	0	0	10.2	12.12	7.85
592	GRMZM2G158304	7	173235560	173258146	CRD_Mean	173220992	SNP_7_173220992	LOC_Os07g48244.1	ubiquinol-cytochrome c reductase complex 6.7 kDa protein, putative, expressed	1344.06	586.402	831.617	751.828	1129.9	1758.76	1278.57	1643.97	2437.2	1792.59	1452.5	1372.37	1316.05	1334.69	1032.45	989.42	2325.96	1122.95	1083.07	578.39	816.41	941.58	1567.59	1102.69	1283.11	1001.56	761.62	678.18	963.49	630.83	1083.5	420.12	952.1	400.7	736.56	815.37	575.79	421.61	406.99	287.94
593	GRMZM2G381378	7	173263217	173265322	CRD_Mean	173220992	SNP_7_173220992	LOC_Os07g48260.1	WRKY47, expressed	6.56889	16.949	1.587	0	0.890833	0	0	0	0	4.32	0	0	7.55	8.81	13.44	1.62	5.63	19.48	10.31	17.68	19.96	7.64	1.16	0.64	0	0	0	0	0	0	0	0	0	70.77	30.83	0	0	0	51.68	0
594	GRMZM2G381386	7	173266640	173274803	CRD_Mean	173220992	SNP_7_173220992	ChrUn.fgenesh.mRNA.85	expressed protein	37.2989	53.4185	41.714	47.5583	39.3983	43.9043	42.99	30.54	26.16	40.12	48.65	43.75	31.4	36.43	37.69	23.21	30.02	38.97	31.56	44.25	42.34	42.23	41.85	45.95	36.26	41.11	77.3	51.71	40.84	54.3	33	95.41	40.11	73.98	45.44	50.33	40.67	68.26	59.96	63.17
595	GRMZM2G469380	7	173595109	173596932	CRD_2017SY	173609433	SNP_7_173609433	LOC_Os07g48490.2	stress responsive protein, putative, expressed	2962.17	3645.07	1987.17	702.67	5910.47	6673.61	10403.4	2429.77	1235.24	3965.74	2691.76	5562.47	2711.38	3208.61	3193.36	2415.59	1624.8	3018.06	2962.04	3784.07	2329.31	2719.06	5677.24	2302.86	1487.63	3021.47	5888.57	1302.54	2090.88	5399.47	1672.97	3429.45	2077.54	10279	2738.29	1957.92	2045.36	7177.4	6102.75	3931.16
596	GRMZM2G348125	7	173641491	173642947	CRD_2017SY	173609433	SNP_7_173609433	LOC_Os07g48500.1	stress responsive protein, putative, expressed	1030.81	5096.25	3958.04	124	43.1325	1.89571	30.7367	535.61	0.83	1107.03	45.86	2078.2	467.67	1381.2	1428.13	941.02	16.68	877.04	1047.81	2805.65	1563.28	1569.73	1540.88	1034.28	113.61	394.77	2430.79	535.02	221.58	1665.57	96.85	1302.3	36.71	11843.6	2811.21	2239.47	532.3	9575.07	18290.5	5579.63
597	AC187067.4_FG001	7	175773543	175773998	CRN_2017SY;CRN_2017SY	175781987	SNP_7_175781987;SNP_7_175781987			0	0	0	0	0	0	0	0	0	0	0	0	0	0	0	0	0	0	0	0	0	0	0	0	0	0	0	0	0	0	0	0	0	0	0	0	0	0	0	0
598	GRMZM2G386824	7	175788655	175797308	CRN_2017SY;CRN_2017SY	175781987	SNP_7_175781987;SNP_7_175781987	LOC_Os09g36810.1	beta-galactosidase precursor, putative, expressed	63.1844	65.136	326.584	437.3	129.402	112.756	125.658	44.04	74.24	40.33	51.27	50.34	51.27	48.83	54.24	33.13	70.23	51.25	65.63	66.16	79.38	79.41	89.96	90.36	97.25	66.92	21.14	31.86	158.7	18.7	98.1	23.55	109.2	31.31	30.29	57.42	124.31	51.13	103.02	35.88
599	GRMZM2G122850	8	67385	71260	CRA_2017SY	69577	SNP_8_69577	LOC_Os01g68770.1	selenium-binding protein, putative, expressed	0	0	0	0	0	0	0	0	0	0	0	0	0	0	0	0	0	0	0	0	0	0	0	0	0	0	0	0	0	0	0	0	0	0	0	0	0	0	0	0
600	GRMZM2G021276	8	95823	98367	CRA_2017SY	69577	SNP_8_69577	LOC_Os01g18870.1	helix-loop-helix DNA-binding domain containing protein, expressed	0	0	0	16.7783	0	0	0	0	0	0	0	0	0	0	0	0	0	0	0	0	0	0	0	0	0	0	0	0	0	0	0	0	0	0	0	0	0	0	0	0
601	GRMZM2G070487	8	19513682	19520990	CRN_2016SY	19507228	SNP_8_19507228			159.409	113.835	180.829	210.215	257.543	378.784	210.392	148.18	303.41	102.08	101.36	136.81	225.3	121.04	137.8	81.47	244.91	137.69	154.27	104.49	157.11	167.38	154.68	177.3	214.08	255.99	109.92	126.58	215.68	82.19	193.6	102.72	231.89	50.73	69.09	65.17	104.69	78.31	87.5	57.8
602	GRMZM2G412234	8	19554612	19560661	CRN_2016SY	19507228	SNP_8_19507228	LOC_Os01g09246.1	glycine-rich protein, putative, expressed	75.1683	65.86	45.301	83.2033	93.66	117.379	56.6517	79.17	79.62	62.29	75.95	100.46	67.7	64.91	85.03	47.4	74.55	59.49	67.41	80.26	82.83	80.12	67.72	79.67	98.45	70.63	150.61	84.14	60.51	47.94	72.32	77.27	61.58	46.04	48.23	63.2	63.11	71.64	59.08	33.31
603	GRMZM2G379286	8	28699209	28705221	CRD_2016SY;CRD_2017SY	28739061	SNP_8_28739061;SNP_8_28747593	LOC_Os01g13150.1	metallo-beta-lactamase family protein, putative, expressed	43.8906	51.874	54.696	60.3683	77.565	131.543	73.5	52.68	63.36	44.96	71.01	32.75	61.23	37.72	41.52	28.45	55.93	46.35	36.02	34.43	35.94	35.51	34.2	39.71	38.26	76.05	64.92	54.26	61.2	54.97	58.26	53.57	73.54	38.06	44.59	45.82	47.13	38.3	44.84	38.97
604	GRMZM2G107205	8	28764040	28771597	CRD_2016SY;CRD_2017SY	28739061	SNP_8_28739061;SNP_8_28747593	LOC_Os01g13160.1	expressed protein	80.8278	91.36	77.288	79.3083	59.7892	71.81	45.325	108.73	100.19	91.35	150.67	58.26	96.61	70.79	74.83	52.13	88.01	58.39	64.99	58.37	71.86	74.39	70.99	73.73	90.61	98.02	86.02	91.6	58.39	122.66	119.71	126.13	94.39	95.65	92.88	95.2	86.66	63.97	62.32	157.9
605	GRMZM2G099231	8	44022908	44025983	CRD_2017SY	44068544	SNP_8_44068544	LOC_Os01g24940.1	poly synthetase 2-A, putative, expressed	24.1228	13.134	40.015	24.075	18.4175	11.83	30.22	26.17	43.82	12.91	11.69	23.04	29.29	21.43	22.22	14.22	40.71	24.49	23.83	13.87	21.92	21.19	22.97	26.2	34.24	46.3	13.58	11.58	46.38	9.7	10.07	8.52	52.05	4.8	2.64	2.5	7.19	0	5.92	8.26
606	GRMZM2G124718	8	44048003	44054105	CRD_2017SY	44068544	SNP_8_44068544	LOC_Os01g24940.1	poly synthetase 2-A, putative, expressed	31.2567	17.54	52.494	27.7333	23.4108	18.0871	38.33	29.48	42.4	24.4	15.34	27.95	29.16	25.94	30.61	22.94	44.31	28.97	30.59	19.81	33.31	29.89	43.5	40.76	43.26	50.46	15.88	12.75	58.82	11.94	10.52	10.39	51.27	6.83	4.49	2.2	7.76	17.47	15.07	11.03
607	GRMZM5G807767	8	76011360	76016337	CRD_2016SY	76036883	8:76036883	LOC_Os05g50980.1	SET domain containing protein, expressed	16.2028	196.119	44.664	57.0933	45.8067	48.5614	50.415	12.15	15.39	12.55	15.72	12.63	14.83	13.39	14.05	9.08	17.9	10.81	14.79	12.36	9.84	14.76	21.49	24.46	45.45	126.63	427.86	443.5	40.82	398.27	321.64	417.39	147.74	85.65	187.46	194.77	133.08	82.9	66.04	132.14
608	GRMZM5G864412	8	76019677	76024604	CRD_2016SY	76036883	8:76036883	LOC_Os07g36250.2	peptide chain release factor protein, putative, expressed	0.0461111	0.0365	0.001	0.168333	0.335833	0.758571	0	0.05	0.11	0	0.03	0.01	0.44	0.02	0.01	0.01	0.06	0	0.02	0.03	0	0	0.01	0.01	0.02	0.25	0.03	0.05	0	0.04	0.01	0	0.02	0.21	0	0.09	0.03	0	0	0
609	GRMZM5G896826	8	76027445	76027977	CRD_2016SY	76036883	8:76036883	LOC_Os07g40300.1	ZOS7-10 - C2H2 zinc finger protein, expressed	0	0	0	0	0	0	0	0	0	0	0	0	0	0	0	0	0	0	0	0	0	0	0	0	0	0	0	0	0	0	0	0	0	0	0	0	0	0	0	0
610	GRMZM5G822426	8	76028798	76031559	CRD_2016SY	76036883	8:76036883	LOC_Os01g42960.1	TTL1, putative, expressed	65.5672	45.045	36.097	147.813	100.511	136.316	99.4817	93.56	167.66	50.04	60.09	75.1	92.92	56.93	41.29	37.87	140.37	25.25	57.76	17.9	28.42	32.73	47.06	41.61	113.65	202.45	7.85	48.23	106.3	0	184.78	0.93	124.26	0	16.7	27.86	181.54	0	0	0
611	GRMZM2G015692	8	76041012	76047878	CRD_2016SY	76036883	8:76036883	LOC_Os01g42690.2	OsPOP2 - Putative Prolyl Oligopeptidase homologue, expressed	21.7944	94.158	28.781	9.73167	3.255	0.398571	20.065	0.94	4.72	2.83	0	6.87	1.25	13.66	13.77	10.67	6.35	54.77	25.77	21.47	132.85	79.17	4.22	4.66	8.33	9.91	139.76	81.05	19.16	127.89	11.88	154.25	4.81	95.53	35.11	14.76	5.03	214.97	187.51	231.02
612	GRMZM2G087451	8	104138256	104142119	CRN_2016SY	104146181	8:104146181	LOC_Os05g34210.1	expressed protein	96.045	79.286	74.548	61.2167	54.7608	75.6529	34.3283	73.17	42.29	107.29	148.07	97.52	84.42	109.38	103.72	54.78	70.95	110.61	118.21	186.28	105.54	96.93	78.56	75.61	65.48	61.45	121.44	77.88	35.83	57.05	54.67	116.9	49.52	110.02	73.31	53.98	53.32	91.08	65.88	85.33
613	GRMZM2G700585	8	104147844	104157499	CRN_2016SY	104146181	8:104146181			0	0	0	0	0	0	0	0	0	0	0	0	0	0	0	0	0	0	0	0	0	0	0	0	0	0	0	0	0	0	0	0	0	0	0	0	0	0	0	0
614	GRMZM2G145029	8	104182030	104186085	CRN_2016SY	104146181	8:104146181	LOC_Os05g34180.1	hydrolase, NUDIX family, domain containing protein, expressed	106.863	170.683	129.279	122.643	181.909	313.056	209.577	84.56	39.03	118.57	122.88	81.42	76.66	147.66	166.06	77.33	50.56	116.28	101.21	222.76	124.42	109.18	103.5	98.3	83.16	54.21	173.6	183.24	45.85	133.24	113.38	146.45	83.92	184	301.63	261.36	152.98	226.77	174.21	165.33
615	GRMZM2G133620	8	104996832	105001716	CRN_2016SY	104966220	SNP_8_104966220	LOC_Os05g33880.2	cysteine proteinase inhibitor precursor protein, putative, expressed	104.866	191.209	147.02	95.9383	146.05	150.133	129.325	87.55	70.04	117.83	113.57	84.05	56.67	118.73	122.08	75.06	67.62	94.16	95.91	135.72	127.62	121.6	116.37	169.86	113.14	67.07	146.09	146.91	80.38	196.03	94.14	209.86	69.44	270.29	176.19	143.37	111.75	282.48	299.34	234.54
616	GRMZM5G893200	8	107204374	107218312	CRA_2015SY	107253067	SNP_8_107253067			0	0	0	0	0	0	0	0	0	0	0	0	0	0	0	0	0	0	0	0	0	0	0	0	0	0	0	0	0	0	0	0	0	0	0	0	0	0	0	0
617	GRMZM2G375222	8	121985823	121998450	CRA_2017SY	122046850	SNP_8_122046850	LOC_Os02g53230.1	transcription elongation factor SPT5 homolog 1, putative, expressed	77.2889	67.5325	75.658	152.5	137.842	161.52	205.707	60.86	68.72	87.9	73.01	76.49	52.69	82.95	82.96	46.89	74.01	64.72	67.77	77.86	85.04	84.14	113.46	92.57	99.16	82.92	44.83	52.1	107.76	18.39	82.61	94.68	136.68	47.75	87.26	129.73	221.18	37.99	35.66	39.66
618	GRMZM2G023471	8	132874113	132923108	CRN_Mean	132970885	SNP_8_132970885	LOC_Os06g07080.1	pre-mRNA-processing-splicing factor 8, putative, expressed	8.18722	7.9285	8.181	10.2033	11.8642	18.9986	13.7333	8.72	14.24	5.37	6.5	8.18	11.95	5.89	6.47	4.67	13.52	7.47	7.07	4.27	7.51	7.9	6.44	8.29	12.91	19.34	7.43	6.48	14.22	5.01	11.09	9.08	11.47	5.87	7.81	5.07	7.58	4.75	3.06	7.37
619	GRMZM2G173128	8	132933188	132935476	CRN_Mean	132970885	SNP_8_132970885	LOC_Os02g52720.1	peroxisomal multifunctional enzyme type 2, putative, expressed	431.979	371.059	262.211	651.332	429.071	127.756	466.818	570.38	904.27	342.4	360.6	506.06	381.43	429.08	353.22	296.84	841.53	200.26	439.46	249.56	191.84	268.23	541.48	401.7	497.28	1294.72	268.82	419.09	195.97	176.15	1072.17	145.49	757.92	73.67	297.89	452.2	673.26	86.66	105.76	114.44
620	GRMZM2G084429	8	132968683	132972064	CRN_Mean	132970885	SNP_8_132970885	LOC_Os05g02410.1	expressed protein	448.748	293.964	528.855	447.483	690.387	1039.63	875.342	464.61	732.33	495.71	293.42	419.5	446.82	454.56	407.74	305.21	674.85	436.04	399.36	263.71	389.89	373.5	595.46	437.64	487.11	536.16	195.95	196.38	510.41	260.16	380.36	254.45	435.71	230.55	217.46	303.7	288.58	286.11	302.03	226.36
621	GRMZM2G386228	8	132973034	132974045	CRN_Mean	132970885	SNP_8_132970885	LOC_Os11g01300.1	protein transport protein Sec61 subunit beta, putative, expressed	225.987	249.084	297.294	206.877	316.392	632.859	326.085	217.6	288.85	176.17	169.65	171.82	171.64	221.4	222.32	142.65	313.18	183.94	253.6	251.15	242.22	233.71	306.58	271.64	229.65	306.16	175.87	170.7	273.84	178.71	242.41	200.23	234.16	243.22	150.2	156.66	274.19	326.82	362.13	268.17
622	GRMZM2G083847	8	132976449	132979350	CRN_Mean	132970885	SNP_8_132970885	LOC_Os05g02220.4	ACT domain containing protein, expressed	154.487	376.675	148.573	339.292	134.01	150.886	289.005	165.95	201.37	162.16	196.04	162.34	138.72	119.36	135.55	57.3	185.77	147.03	217.06	160.12	171.96	152.66	143.67	128.87	134.83	122.94	364.35	257.99	131.59	855.29	114.81	262.62	54.79	110.5	102.71	112.99	83.43	505.27	449.44	294.98
623	GRMZM2G164612	8	151637927	151643014	CRD_2016SY	151668616	SNP_8_151668616	LOC_Os01g49580.1	Protein kinase domain containing protein, expressed	3.56611	56.0425	15.872	1.54667	0.380833	0	0.105	1.81	0	1.55	1.73	1.33	0	3.34	4.55	1.19	0	4.09	3.17	8.92	14.33	9.79	3.48	3.53	1.38	0	11.88	12.35	1.55	25.38	0	12.35	0	66.14	9.47	5.79	2.23	78.18	114.87	80.29
624	GRMZM2G164640	8	151647439	151648571	CRD_2016SY	151668616	SNP_8_151668616	LOC_Os01g49614.1	Protein kinase domain containing protein, expressed	2.80389	45.0465	14.821	0.556667	0.114167	0	0	0	0	0	0	0	0	0.87	4.34	2.74	0	4.37	2.4	10.64	9.72	7.26	3.82	3.03	1.28	1.66	18.11	15.19	0	26	0	12.05	0	52.14	4.14	0	0	68.5	104.03	68.66
625	GRMZM2G091973	8	151665983	151669598	CRD_2016SY	151668616	SNP_8_151668616	LOC_Os05g47690.1	reticulon domain containing protein, putative, expressed	37.2478	11.8705	10.538	10.43	4.1825	3.57571	1.95167	42.7	2.55	61.92	2.19	269.86	48.38	38.31	28.6	27.27	4.38	40.9	21.17	22.54	7.83	15.64	17.21	12.73	6.28	17.08	7.9	15.39	32.4	1.63	63.89	1.78	29.48	0.55	7.66	3.76	49.67	1.01	0.28	0.89
626	GRMZM2G393150	8	151665988	151666697	CRD_2016SY	151668616	SNP_8_151668616	LOC_Os01g49650.1	LTPL150 - Protease inhibitor/seed storage/LTP family protein precursor, expressed	0	0.4	0.008	78.4167	4.53667	4.66714	2.92667	0	0	0	0	0	0	0	0	0	0	0	0	0	0	0	0	0	0	0	0	0	0	0	0	0	0	0	0	7.96	0.04	0	0	0
627	GRMZM2G092018	8	151668926	151683349	CRD_2016SY	151668616	SNP_8_151668616	LOC_Os01g49670.1	cytidylyltransferase domain containing protein, expressed	36.81	31.0085	31.983	27.865	20.4425	17.1971	23.3617	38.14	50.35	37.24	30.48	58.42	39.55	40.07	43.66	27.44	46.96	34.61	34.08	34.42	29.45	34.82	30.76	32.79	19.34	47.69	45.61	34.02	24.09	36.74	34.08	40.75	47.07	26.08	48.76	28.3	41.72	19.19	13.57	29.29
628	GRMZM2G010468	8	169997346	169999737	CRD_Mean;CRD_2016SY	169995675	8:169995675;8:169995675	LOC_Os01g60450.1	cytochrome P450, putative, expressed	19.1339	37.9355	10.193	16.3433	5.67667	0.132857	17.9233	10.04	0.93	17.07	7.61	23.14	9.69	26.55	45.41	13.02	0	5.18	18.93	51.99	64.19	35.61	5	5.42	4.63	7.22	37.27	57.2	4.5	77.63	7.31	24.54	1.44	3.39	20.94	48.59	27.23	3.9	17.11	5.46
629	GRMZM2G110714	8	173256053	173268974	CRA_2015SY	173266113	8:173266113	LOC_Os08g27840.1	phosphoenolpyruvate carboxylase, putative, expressed	43.7344	39.011	198.267	294.212	401.938	262.657	445.278	30.17	22.98	37.17	10.89	86.03	40.42	31.31	35	19.55	19.77	54.46	33.2	13.37	38.67	51.91	89.91	89.37	83.04	84.3	10.42	19.51	293.11	20.09	55.77	7.34	84.97	1.07	27.15	22.29	36.59	0	3.52	2.67
630	GRMZM2G082490	8	173272809	173273930	CRA_2015SY	173266113	8:173266113	LOC_Os01g55340.1	dof zinc finger domain containing protein, putative, expressed	1.38056	0.4435	1.767	4.94167	0.575	0	0	0	0	0	0	1.8	8.43	1.67	4.12	0	1.27	0	0	2.27	0	0	1.81	1.19	2.29	8.87	0	0	0	0	0	0	0	0	0	0	0	0	0	0
631	AC194097.3_FG009	8	173304354	173305010	CRA_2015SY	173266113	8:173266113			0	0	0	0	0	0	0	0	0	0	0	0	0	0	0	0	0	0	0	0	0	0	0	0	0	0	0	0	0	0	0	0	0	0	0	0	0	0	0	0
632	AC194097.3_FG008	8	173313494	173314134	CRA_2015SY	173266113	8:173266113			0	0	0	0	0	0	0	0	0	0	0	0	0	0	0	0	0	0	0	0	0	0	0	0	0	0	0	0	0	0	0	0	0	0	0	0	0	0	0	0
633	GRMZM2G153615	8	173705487	173710861	CRN_2017SY	173728606	SNP_8_173728606	LOC_Os01g55050.1	protein of unknown function DUF1421 domain containing protein, expressed	208.52	162.77	163.205	162.905	155.713	132.191	143.385	185.42	78.26	234.08	277.23	234.44	177.66	230.84	260.55	147.65	105.28	258.66	202.36	284.8	241.79	270.89	205.48	198.33	159.64	131.63	177.54	107.6	136.48	134.46	120.2	181.79	124.01	178.66	161.14	172.39	181.11	152.86	166.04	199.86
634	GRMZM2G153648	8	173729870	173732288	CRN_2017SY	173728606	SNP_8_173728606	LOC_Os01g55020.2	expressed protein	65.5906	62.6405	75.09	68.155	101.254	241.189	148.36	83.02	155.38	64.24	35.27	42.35	89	50.67	51.34	40	111.64	54.25	44.89	24.87	57.06	50.91	83.14	65.46	77.14	129.78	31.36	54.4	93.5	31.25	86.88	58.66	100.41	72.72	81.75	68.56	49.46	47	85.81	41.85
635	GRMZM2G455087	8	173735048	173737435	CRN_2017SY	173728606	SNP_8_173728606	LOC_Os08g12760.1	YT521-B, putative, expressed	0.0605556	0.0175	0	0	0	0	0	0	0	0	0	0	1.09	0	0	0	0	0	0	0	0	0	0	0	0	0.35	0	0	0	0	0	0	0	0	0	0	0	0	0	0
636	GRMZM5G874163	8	173768820	173775129	CRN_2017SY	173728606	SNP_8_173728606	LOC_Os01g54990.1	auxin response factor, putative, expressed	59.5156	93.6325	97.512	84.6817	36.5458	15.22	164.947	46.09	23.1	69.16	71.59	59.99	52.05	51.26	51.61	38.45	35.29	70.76	44.65	55.66	55.57	68.33	103.13	94.48	80.11	106.56	60.61	52.49	80.25	52.65	42	72.68	39.69	106.85	124.63	110.57	65.73	175.1	142	158.66
637	GRMZM2G048243	9	3896830	3910777	CRN_2017SY	3940095	SNP_9_3940095	LOC_Os06g12590.1	protein kinase, putative, expressed	175.338	81.246	105.932	69.385	58.9275	55.0786	49.6733	173.73	265.21	161.63	195.37	113.37	158.54	208.2	211.74	125.42	220.39	142.57	159.09	213.95	171.19	170.12	173.63	173.14	118.79	168.08	207.68	125.32	71.62	73.44	50.12	61.7	56.52	84.03	68.26	63.23	40.22	76.46	72.49	65.35
638	GRMZM2G110726	9	3927533	3937364	CRN_2017SY	3940095	SNP_9_3940095	LOC_Os06g12530.1	CS domain containing protein, putative, expressed	15.3894	58.6295	87.767	85.025	156.074	313.836	146.613	10.65	20.03	9.19	6.03	7.32	56.27	13.29	14.32	11.46	13.19	10.56	9.58	11.28	16.02	17.83	14.24	18.82	16.93	89.26	3.01	59.05	132.83	31.71	101.58	21.08	137.71	46.74	57.42	66.75	97.68	26.29	45.33	46.45
639	GRMZM2G017537	9	7177685	7182643	CRD_2016SY	7180107	SNP_9_7180107	LOC_Os06g11370.1	mediator of RNA polymerase II transcription subunit 6, putative, expressed	117.609	105.485	143.325	116.787	141.159	222.101	137.492	112.26	156.03	92.57	96.74	104.4	124.28	99.8	101.28	66.49	160.76	102.1	111.53	102.78	135.81	124.03	153.51	126.14	146.45	164.81	62.11	49.11	170.32	64.16	100.82	56.25	96.11	81.41	56.39	129.17	230.16	133.18	213.38	61.88
640	GRMZM2G017257	9	7187390	7211060	CRD_2016SY	7180107	SNP_9_7180107	LOC_Os06g11380.1	geminivirus Rep-interacting motor protein, putative, expressed	42.0022	408.045	88.262	130.772	83.1592	96.33	108.937	44.42	63.29	31.09	37.15	40.53	56.07	33.03	38.52	28.71	58.72	50.33	39.94	30.51	33.32	37.43	35.09	41.12	56.77	107.54	884.57	552.73	121.47	853.43	144.25	675.62	105.79	366.79	181.94	104.21	86.3	721.52	569.33	627.79
641	GRMZM2G177276	9	11707996	11712257	CRD_2016SY;CRN_2016SY	11715568	SNP_9_11715568;SNP_9_11715568	LOC_Os06g09330.1	ubiquitin-conjugating enzyme, putative, expressed	158.356	129.581	136.33	155.62	173.528	238.799	114.595	129.99	119.97	152.19	168.06	179.29	128.9	187.73	176.9	115.95	127.44	150.28	158.83	224.97	171.52	192.82	163.96	172.25	129.35	121.67	128.18	102.25	111.83	133.61	101.54	144.54	125.35	123.99	107.85	103.04	101.93	141.11	155.57	145.06
642	GRMZM2G177231	9	11715837	11719973	CRD_2016SY;CRN_2016SY	11715568	SNP_9_11715568;SNP_9_11715568	LOC_Os06g09320.1	expressed protein	92.7222	139.817	93.002	121.73	112.25	113.86	104.537	92.92	114.37	102.86	75.59	147.23	91.17	84.57	88.49	57.48	91.17	72.08	85.66	73.69	74.56	86.59	104.97	112.74	112.86	121.57	225.93	132.6	92	168.1	65.31	228.79	74.36	158.7	80.18	71.29	49.21	224.88	176.41	211.07
643	GRMZM2G478553	9	11736162	11737986	CRD_2016SY;CRN_2016SY	11715568	SNP_9_11715568;SNP_9_11715568	LOC_Os06g09310.1	zinc finger, C3HC4 type domain containing protein, expressed	42.97	44.147	25.385	3.70667	0.983333	2.28571	8.76833	46.89	3.43	123.97	78.77	16.21	130.81	50.94	36.15	24.88	7.94	56.51	38.57	106.5	11.77	8.93	6.98	11.64	12.57	40.89	2.2	3.02	0	0	0	0	0	286.48	110.98	57.21	23.22	66.88	67.01	27.62
644	GRMZM2G177218	9	11743655	11744876	CRD_2016SY;CRN_2016SY	11715568	SNP_9_11715568;SNP_9_11715568	LOC_Os06g09270.1	hypro1, putative, expressed	51.7439	0	0	0	0	0	0	16.35	1.91	53.28	25.92	0	5.57	130.27	106.12	74.32	39.18	161.34	65.54	195.82	20.36	22.51	5.6	7.3	0	0	0	0	0	0	0	0	0	0	0	0	0	0	0	0
645	GRMZM2G177215	9	11745382	11745684	CRD_2016SY;CRN_2016SY	11715568	SNP_9_11715568;SNP_9_11715568			0	0	0	2.73667	0	9.31429	0	0	0	0	0	0	0	0	0	0	0	0	0	0	0	0	0	0	0	0	0	0	0	0	0	0	0	0	0	0	0	0	0	0
646	GRMZM2G177098	9	11745997	11754981	CRD_2016SY;CRN_2016SY	11715568	SNP_9_11715568;SNP_9_11715568	LOC_Os01g23530.1	terpene synthase, putative, expressed	369.229	523.624	438.297	404.718	683.475	1000.96	772.543	419.09	817.41	282.67	204.18	324.93	413.15	289.48	271.75	207.3	740.47	296.38	343.45	165.3	284.37	260.24	480.05	348.81	497.1	758.35	244.57	504.57	647.98	412.86	536.27	735.03	566.64	661.3	244.41	197.73	380.73	352.4	468.35	626.93
647	GRMZM2G300408	9	14541001	14542356	CRA_Mean	14583536	SNP_9_14583536			7.86389	134.023	15.99	12.2167	20.5942	50.9986	21.4233	7.53	1.16	7.58	6.29	7.03	7.37	9.61	9.47	6.5	5.04	5.3	7.18	11.21	8.89	9.29	9.11	13.25	9.74	24.14	240.98	203.99	8.74	278.1	89.32	259.99	45.6	154.76	206.73	215.56	132.35	141.12	203.27	104.5
648	GRMZM2G000423	9	14543729	14545527	CRA_Mean	14583536	SNP_9_14583536	LOC_Os06g08023.1	flavonol synthase/flavanone 3-hydroxylase, putative, expressed	13.9978	276.236	1.711	7.43667	37.1108	0	243.342	0	0	0	0	0	0	0	0	0	0	0	0	0	0	0	0	0.65	251.31	6.19	0	2.41	0	87.89	0	66.09	0	11.38	0	0	0	11.02	67.62	133.24
649	GRMZM2G000393	9	14548030	14553129	CRA_Mean	14583536	SNP_9_14583536	LOC_Os06g07905.1	galactosyltransferase family protein, putative, expressed	167.414	111.028	142.319	138.642	267.423	435.983	163.803	202.09	327	140.53	95.19	170.9	222.22	136.38	147.82	88.5	267.8	122.04	140.22	89.91	132.51	137.11	188.45	180.36	224.42	269.94	62.59	70.36	148.98	84.7	192.28	61.65	161.04	66.84	98.22	126.33	180.65	67.02	96.07	67.26
650	GRMZM2G000371	9	14554517	14561277	CRA_Mean	14583536	SNP_9_14583536			100.565	89.3475	137.162	115.275	99.5008	87.3614	126.57	104.86	113.62	94.24	114.38	102.73	110.04	96.96	96.17	57.05	136.33	88.66	93.16	96.41	99.41	96.45	106.05	103.48	100.17	112.27	60.72	59.64	87.47	53.12	73.09	76.27	105.95	82.54	70.31	81.02	108.9	142.3	143.72	99.85
651	GRMZM2G023636	9	14569237	14591580	CRA_Mean	14583536	SNP_9_14583536	LOC_Os03g17432.1	pre-mRNA-splicing factor ATP-dependent RNA helicase DHX16, putative, expressed	71.3933	55.574	99.195	92.23	70.0033	49.2186	83.5033	86.18	107.64	51.13	90.42	84.77	85.61	66.51	68.04	48.01	112.48	72.32	65.1	61.74	57.74	64.56	35.25	58.91	68.67	91.9	39.74	46.44	72.01	39.51	54.14	52.99	104.11	47.34	24.89	39.77	50.21	82.46	54.26	76.05
652	GRMZM2G023760	9	14624670	14625146	CRA_Mean	14583536	SNP_9_14583536	LOC_Os08g02640.1	succinate dehydrogenase iron-sulfur subunit 2,mitochondrial precursor, putative, expressed	0	0	0	0	0	0	0	0	0	0	0	0	0	0	0	0	0	0	0	0	0	0	0	0	0	0	0	0	0	0	0	0	0	0	0	0	0	0	0	0
653	GRMZM2G396553	9	23537710	23541078	CRA_Mean	23579864	9:23579864	LOC_Os06g04070.1	pyridoxal-dependent decarboxylase protein, putative, expressed	199.323	864.505	187.45	441.55	229.928	90.9343	337.078	272.66	170.52	336.55	130.1	334.91	406.32	222.93	260.72	134.11	114.66	206.52	148.24	217.04	114.4	99.81	132.28	143.13	142.91	438.66	724.18	449.03	284.75	1211.12	282.94	796.67	132.51	1263.39	525.87	442.8	410.67	2860.41	2462.95	668
654	GRMZM2G396562	9	23546680	23552583	CRA_Mean	23579864	9:23579864	LOC_Os06g04040.1	WD domain, G-beta repeat domain containing protein, expressed	34.615	42.3555	42.766	38.01	50.0683	89.5986	47.2483	34.37	42.7	36.27	39.21	34.44	29.53	28.73	31.97	20.19	34.71	31.65	33.57	36.91	35.84	36.38	41.31	35.71	39.58	45.61	46.35	40.66	52.35	65.62	35.96	56.97	40.93	47.75	30.97	28.76	29.84	25.65	36.31	49.52
655	GRMZM5G884319	9	23621015	23621875	CRA_Mean	23579864	9:23579864			0.633333	0.474	0.477	4.11167	13.1483	35.6229	2.93333	0	3.12	0	0	0	0	0	2.12	0	1.2	0	0.68	0	0	0.52	3.2	0.56	0	0	0	0	0	0	1.21	0	8.27	0	0	0	0	0	0	0
656	GRMZM2G117166	9	45924986	45927418	CRN_2016SY	45947817	9:45947817			0	0	0	0	0	0	0	0	0	0	0	0	0	0	0	0	0	0	0	0	0	0	0	0	0	0	0	0	0	0	0	0	0	0	0	0	0	0	0	0
657	GRMZM2G363183	9	45936383	45938540	CRN_2016SY	45947817	9:45947817			219.182	26.0815	17.888	7.255	1.0125	0	0	198.85	29.14	304.02	218.65	787.3	158.76	224	241.16	113.01	53.11	209.71	210.57	364.08	262.96	273.84	147.83	127.85	20.43	91.67	39.86	30.88	0	5.36	33.1	66.03	13.92	23.14	56.94	52.37	30.68	12.05	6.46	17.13
658	GRMZM2G363186	9	45937826	45938540	CRN_2016SY	45947817	9:45947817			136.376	20.3435	10.861	2.54333	0.4325	0	0	162.04	20.33	216.66	139.04	390.38	106.04	163.62	174.31	77.18	35.08	114.48	128.28	230.16	149.29	151.1	105.6	83.04	8.14	41.19	23.91	16.04	0	6.66	16.55	30.65	8.57	37.82	43.14	70.36	60.62	0	4.75	18.92
659	AC205712.3_FG003	9	45980492	45981958	CRN_2016SY	45947817	9:45947817			0.117222	0	0	0	0	0	0	0	0	0	0	0	0	0	2.11	0	0	0	0	0	0	0	0	0	0	0	0	0	0	0	0	0	0	0	0	0	0	0	0	0
660	GRMZM2G092256	9	84248689	84262621	CRN_2016SY;CRN_2016SY;CRA_2017SY	84205355	SNP_9_84205355;SNP_9_84205355;SNP_9_84245934	LOC_Os06g38320.2	expressed protein	66.2828	677.966	168.583	146.947	29.5425	6.30714	94.61	72.16	30.66	80.93	90.44	117.27	14.21	31.52	37.99	17.29	30.55	31.64	42.12	48.61	54.69	59.35	29.79	64.87	339	21.62	845.21	703.94	162.76	1142.69	274.56	873.59	90.12	677.23	446.86	239.46	137.2	1100.41	976.4	944.69
661	GRMZM5G881123	9	104697754	104699121	CRA_Mean	104689176	SNP_9_104689176	LOC_Os03g18890.1	glycosyl transferase 8 domain containing protein, putative, expressed	0	0	0	0	0	0	0	0	0	0	0	0	0	0	0	0	0	0	0	0	0	0	0	0	0	0	0	0	0	0	0	0	0	0	0	0	0	0	0	0
662	GRMZM2G106357	9	108220888	108223101	CRA_2016SY	108240466	SNP_9_108240466	LOC_Os06g43140.1	GA16396-PA, putative, expressed	6.065	8.1645	13.805	5.555	9.91167	12.7329	9.95333	3.44	1.41	5.58	5.65	6.32	3.98	5.01	6.46	2.48	0.28	4.55	3.93	11.21	11.2	8.2	7.23	13.29	8.95	3.96	7.12	4.35	5.99	12.36	1.54	8.38	3.07	12.06	0	0	0	9.04	12.15	15.13
663	GRMZM2G405474	9	108226452	108228183	CRA_2016SY	108240466	SNP_9_108240466	LOC_Os06g44500.1	OsFBK17 - F-box domain and kelch repeat containing protein, expressed	63.0378	36.262	105.865	24.305	28.7725	7.57143	21.8533	80.22	42.18	97.23	129.9	64.58	87.34	39.38	51.3	28.5	40.09	41.51	30.37	43.23	48.23	45.77	106.08	96.91	61.86	62.19	15.36	15.27	63.33	18.49	17.27	11.64	17.38	30.71	66.94	69.47	46.34	26.77	31.1	47.89
664	GRMZM2G164283	9	135711490	135712823	CRN_2016SY	135746593	SNP_9_135746593	LOC_Os03g19310.1	glycosyltransferase, putative, expressed	0	1.925	0	0	0	0	0	0	0	0	0	0	0	0	0	0	0	0	0	0	0	0	0	0	0	0	0	0	0	5.18	0	0	0	0	0	0	0	0	9.47	0
665	GRMZM2G465213	9	135733673	135734672	CRN_2016SY	135746593	SNP_9_135746593	LOC_Os03g19310.1	glycosyltransferase, putative, expressed	0.0561111	0	0	0	0	0	0	0	0	0	0	0	0	0	0	0	1.01	0	0	0	0	0	0	0	0	0	0	0	0	0	0	0	0	0	0	0	0	0	0	0
666	GRMZM2G083301	9	141027308	141028930	CRN_Mean	141028857	SNP_9_141028857			0.0844444	0.6435	0.046	0.06	0.378333	0.292857	0	0	0	0	0	0	0	0	0.3	0	0.27	0	0	0	0	0	0	0.41	0.54	1.41	3.36	2.18	0	0	0	3.4	0	0	0	0	0	0	0	0
667	GRMZM2G083367	9	141030007	141031889	CRN_Mean	141028857	SNP_9_141028857	LOC_Os03g15800.1	B4-BTB2 - Bric-a-Brac, Tramtrack, Broad Complex BTB domain with B4 subfamily conserved sequence, expressed	41.2006	82.223	52.864	38.85	29.6375	18.7486	39.5433	51.31	62.39	37.69	50.02	31.46	46.87	46.41	47.76	30.89	56.58	34.66	38.24	43.77	31.52	30.37	37.3	36.07	28.3	70.74	105.69	82.77	53.61	80.93	42.69	99.4	38.26	86.89	68.94	63.22	40.47	98.89	106.72	132.42
668	GRMZM2G083402	9	141036908	141040085	CRN_Mean	141028857	SNP_9_141028857	LOC_Os03g15770.1	tyrosine protein kinase domain containing protein, putative, expressed	10.7128	42.7435	6.14	6.195	2.125	0.265714	1.36	10.12	0	12.1	13.1	13.65	15.46	9	12.08	5.16	0.12	8.77	11.86	25.72	18.45	15.42	8.86	9.85	3.11	1.81	44.63	33.96	3.66	42.11	2.04	46.86	0	85.01	11.91	12.78	4.69	60.08	65.98	123.32
669	GRMZM2G017831	9	148929810	148933147	CRD_2016SY;CRN_2016SY	148956154	SNP_9_148956154;SNP_9_148956257	LOC_Os03g10070.1	transcription initiation factor IIB, putative, expressed	31.3233	39.3405	49.336	45.2783	48.1983	70.2471	54.54	32.9	32.26	32.17	35.01	29.45	18.55	28.84	38.1	20.96	29.99	28.89	28.04	36.2	35.03	32.85	34.65	35.81	34.12	36.52	33.04	42.76	40.92	35.04	51.49	35.73	56.2	34.89	47.27	45.2	52.71	31.33	34.18	36.72
670	GRMZM2G017957	9	148934123	148938650	CRD_2016SY;CRN_2016SY	148956154	SNP_9_148956154;SNP_9_148956257	LOC_Os01g39790.1	esterase/lipase/thioesterase, putative, expressed	7.15944	291.552	27.788	54.7317	30.23	40.6114	55.2533	5.07	9.72	3.51	2.78	5.04	10.21	7.92	7.19	2.34	9.29	9.35	7.25	1.82	4.48	7.05	12.76	7.27	15.82	151.56	1099.66	908.73	37.1	992.18	235.74	1069.93	90.05	67.27	195.23	197.86	113.58	50.38	60.47	98.23
671	GRMZM2G059891	9	152235892	152238887	CRD_2015SY	152239467	SNP_9_152239467	LOC_Os03g04450.1	expressed protein	33.6844	49.6065	44.732	44.06	43.9117	45.4414	41.4	31.87	37.04	26.55	33	29.36	32.4	31.77	38.19	22.07	35.91	32.1	33.98	39.26	35.18	36.15	31.02	38.91	41.56	50.96	48.74	34.89	35.68	42.63	34.19	48.75	38.05	56.99	33.25	36.01	38.14	59.71	82.89	59.99
672	GRMZM2G059937	9	152240659	152244263	CRD_2015SY	152239467	SNP_9_152239467	LOC_Os03g04460.1	outer mitochondrial membrane porin, putative, expressed	89.3306	59.0265	78.575	69.13	75.3783	95.4029	75.3817	105.05	168.43	79.05	84.27	61.85	115.24	78.59	78.97	52.8	114.36	63.47	79.37	62.18	79.72	82.64	78.48	88.22	135.26	124.89	29.13	51.71	66.05	58.34	73.86	50.95	72.05	51.63	54.53	54.8	44.14	45.81	29.18	47.56
673	GRMZM2G358931	9	152252293	152255778	CRD_2015SY	152239467	SNP_9_152239467	LOC_Os03g04490.1	cyclin-dependent kinase inhibitor, putative, expressed	34.0861	23.9685	31.908	64.6433	52.6308	76.8729	55.1433	38.34	20.21	51.31	55.62	31.56	14.9	30.91	37.81	19.67	20.88	25.07	29.63	34.66	33.59	35.33	48.13	62.78	23.15	33.54	15.64	18.41	44	13.31	12.66	17.85	30.85	18.33	33.78	24.17	14.23	6.5	24.04	16.16
674	GRMZM2G126839	9	152259012	152266291	CRD_2015SY	152239467	SNP_9_152239467	LOC_Os03g04520.2	RNA recognition motif containing protein, putative, expressed	47.01	75.704	70.522	67.19	61.6908	63.8729	59.96	41.66	54.71	38.79	44.42	45.4	45.12	43.38	45.83	26.12	53.92	42.68	44.31	53.44	54.43	53.79	49.58	56.38	52.22	63	94	69.23	67.58	97.12	60.61	124.6	74.9	73.18	66.85	60.17	50.28	76.64	77.02	104.43
675	AC149818.2_FG006	9	152709300	152712095	CRN_2017SY	152760005	SNP_9_152760005	LOC_Os10g31000.1	ubiquitin-conjugating enzyme, putative, expressed	123.346	110.227	148.352	135.003	135.835	141.6	131.98	121.54	94.9	145.25	109.96	149.28	124.74	148.35	131.68	86.17	116.77	122.98	117.89	132.85	91.86	110.24	145.18	137.35	133.24	146.53	105.69	84.71	113.52	87.07	102.07	89.88	99.45	91.63	92.47	85.35	84.5	117.49	121.41	139.01
676	AC149818.2_FG007	9	152719947	152721236	CRN_2017SY	152760005	SNP_9_152760005	LOC_Os03g05460.1	expressed protein	8.95667	9.5445	16.312	15.3117	23.5142	18.8871	28.6967	7.92	8.48	4.91	5.67	10.78	17.17	5.17	6.03	4	7.14	7.6	5.51	8.88	11.94	10.34	12.73	10.56	16.39	20.65	2.49	4.89	24.24	3.33	8.46	2.52	10.4	3.99	21.19	12.32	14.65	0	9.07	0
677	AC149818.2_FG008	9	152726608	152728503	CRN_2017SY	152760005	SNP_9_152760005	LOC_Os03g05480.1	ZOS3-01 - C2H2 zinc finger protein, expressed	10.2506	19.8365	15.3	17.57	24.23	34.5686	23.825	9.47	9.59	9.28	17.65	10.02	18.66	8.36	9.6	6.79	8.91	10.21	9.62	13.68	7.05	8	7.05	8.86	11.71	20.2	25.74	22.19	17.59	23.46	17.39	30.24	18.64	10.75	10.6	17.79	20.96	24.79	24.52	20.65
678	AC149818.2_FG009	9	152747407	152748234	CRN_2017SY	152760005	SNP_9_152760005	LOC_Os03g05510.1	DUF260 domain containing protein, putative, expressed	5.89333	3.609	0	0	0	0.848571	0	20.39	0	32.26	15.75	0	15.63	2.72	4.05	4.54	0	0	0	0	4.79	3.82	1.27	0.86	0	0	0	0	0	0	0	0	0	0	0	0	0	0	40.77	0
679	AC149475.2_FG002	9	152751857	152754681	CRN_2017SY	152760005	SNP_9_152760005	LOC_Os03g05520.1	nicotiana lesion-inducing like, putative, expressed	473.438	232.084	409.778	618.453	755.503	1398.14	750.255	610.27	1180.52	269.46	230.38	409.55	650.78	405.06	346.9	283.4	1110.41	329.98	486.65	133.57	331.43	352.68	301.83	427.92	661.1	1916.66	153.13	206.81	751.84	244.53	420.05	43.74	476.06	11.13	12.23	0	123.15	0	27.52	37.25
680	AC149475.2_FG003	9	152756800	152761381	CRN_2017SY	152760005	SNP_9_152760005	LOC_Os11g40140.1	peptidase, T1 family, putative, expressed	405.916	269.666	289.962	338.965	425.102	687.927	592.605	482.49	719.94	435.51	374.33	428.16	588.38	381.49	320.97	268.75	637.23	326.23	372.62	215.24	328.89	354.79	280.69	384.26	406.51	658.56	291.36	242.81	425.09	223.65	399.78	214.69	419.67	136.26	191.2	198.53	277.48	134.69	218.04	162.26
681	AC149475.2_FG005	9	152791245	152801912	CRN_2017SY	152760005	SNP_9_152760005	LOC_Os03g05690.1	ZOS3-03 - C2H2 zinc finger protein, expressed	22.1611	44.078	28.118	48.8133	28.8117	30.5871	37.855	21.89	27.82	15.21	23.67	18.42	22.26	18.78	21.69	11.88	33	22.25	23.32	24.64	24.67	21.71	16.21	19.8	31.68	51.98	65.1	54.81	40.41	68.84	35.38	63.71	41.09	39.88	28.28	29.44	32.77	45.47	34.97	51.11
682	GRMZM2G158293	9	156233054	156240955	CRD_2017SY;CRD_Mean	156232348	SNP_9_156232348;SNP_9_156232348	LOC_Os03g39740.1	expressed protein	9.29833	5.318	10.917	17.9383	12.6883	14.6029	17.4383	10.37	19.91	5.27	3.31	5.76	19.39	6.94	6.59	7.03	21.44	14.75	10.53	1.31	5.14	6.15	7.57	6.39	9.52	38.89	0	2.49	27.42	0	10.96	0	24.57	0	0	0	2.03	0	0	0
683	GRMZM2G148090	9	156245115	156247188	CRD_2017SY;CRD_Mean	156232348	SNP_9_156232348;SNP_9_156232348	LOC_Os08g03310.3	zinc finger family protein, putative, expressed	0.425	193.042	4.096	13.5217	0	0	0	0	0	0	0	0	0	0	0	0	0	0	0	0	0.78	0.87	0	0	6	0	550.37	262.71	0	168.69	0	435.76	0	464.57	52.89	7.63	0	153.15	159	358.18
[truncated: 46 more columns]
